# Supplementary material for: Lifestyle and ADL Are Prioritized Factors Influencing All-Cause Mortality Risk Among Oldest Old: A Population-Based Cohort Study
Source: PubMed Central journal article supplement — Inquiry. 2024 Feb 27;61:00469580241235755. doi: 10.1177/00469580241235755 (PMC10901056; doi:10.1177/00469580241235755), 2024-02-27
Supplement: sj-pdf-1-inq-10.1177_00469580241235755.pdf [file sj-pdf-1-inq-10.1177_00469580241235755.pdf]

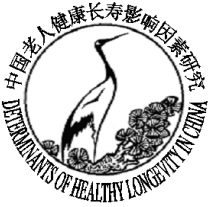

Interviews are based on voluntary participation

**Questionnaire Addressed to a Close Family Member of the Deceased  
Interviewees in Determinants of Healthy Longevity in China (2018)**

No.

**Note: This questionnaire is addressed to a family member (or a close friend if the family member is not available) of the deceased elder.**

Province code

County (district) code

Place of residence of the deceased elder at death

1. city 2. town 3. rural

Name of deceased elder \_\_\_\_\_

Name of proxy reporter \_\_\_\_\_ Signature of proxy reporter \_\_\_\_\_

**Relationship between deceased elder and proxy**

0. Parent 1. Spouse 2. Child 3. Spouse of child 4. Grandchild or grandchild's spouse 5. Relative 6. Neighbor 7. Community worker 8. Other

**Address of the deceased elder before death:**

\_\_\_\_\_ Detailed village or street address (including street, apartment #) district or town/township, county/city, \_\_\_\_\_

\_\_\_\_\_ province

Post Code

Tel No \_\_\_\_\_

Person to contact \_\_\_\_\_

Tel. No. of Community Office \_\_\_\_\_

Person to contact at Community Office \_\_\_\_\_

**Date at death of the deceased elder:**

Reported by family members \_\_\_\_\_ day \_\_\_\_\_ month \_\_\_\_\_ year

Validated date at death \_\_\_\_\_ day \_\_\_\_\_ month \_\_\_\_\_ year

**If the interview could not be conducted, the reason is:**

1. refusal 2. other (please specify) \_\_\_\_\_

**Signature and date (month and day):**

Interviewer \_\_\_\_\_; Check at city level \_\_\_\_\_;

Check at provincial level \_\_\_\_\_;

Check in Beijing \_\_\_\_\_.

| 1. Sex                                                                                                                                                                                                                                                                                                                | 1. male 2. female                                                                                                                                                                                                                                                                                                                                                                                                                                                                                                                                                                                                                                                                                                                                                                                                                                                                                                                                                                                                                                                                                                                                                                                                                                                                      | <input type="checkbox"/>                                                                                                                                                            |           |            |                                       |            |                                       |                                                                                                                                                                                                                             |  |  |  |  |  |                             |  |  |  |  |  |                                                                                                                          |  |  |  |  |  |                                                                                                                                                                                                                                                                                                                       |  |  |  |  |  |                                                                                                                                                                  |  |  |  |  |  |  |
|-----------------------------------------------------------------------------------------------------------------------------------------------------------------------------------------------------------------------------------------------------------------------------------------------------------------------|----------------------------------------------------------------------------------------------------------------------------------------------------------------------------------------------------------------------------------------------------------------------------------------------------------------------------------------------------------------------------------------------------------------------------------------------------------------------------------------------------------------------------------------------------------------------------------------------------------------------------------------------------------------------------------------------------------------------------------------------------------------------------------------------------------------------------------------------------------------------------------------------------------------------------------------------------------------------------------------------------------------------------------------------------------------------------------------------------------------------------------------------------------------------------------------------------------------------------------------------------------------------------------------|-------------------------------------------------------------------------------------------------------------------------------------------------------------------------------------|-----------|------------|---------------------------------------|------------|---------------------------------------|-----------------------------------------------------------------------------------------------------------------------------------------------------------------------------------------------------------------------------|--|--|--|--|--|-----------------------------|--|--|--|--|--|--------------------------------------------------------------------------------------------------------------------------|--|--|--|--|--|-----------------------------------------------------------------------------------------------------------------------------------------------------------------------------------------------------------------------------------------------------------------------------------------------------------------------|--|--|--|--|--|------------------------------------------------------------------------------------------------------------------------------------------------------------------|--|--|--|--|--|--|
| 2. Marital status before dying                                                                                                                                                                                                                                                                                        | 1. married and living with spouse<br>2. married but separated from spouse<br>3. divorced<br>4. widowed<br>5. never married                                                                                                                                                                                                                                                                                                                                                                                                                                                                                                                                                                                                                                                                                                                                                                                                                                                                                                                                                                                                                                                                                                                                                             | <input type="checkbox"/>                                                                                                                                                            |           |            |                                       |            |                                       |                                                                                                                                                                                                                             |  |  |  |  |  |                             |  |  |  |  |  |                                                                                                                          |  |  |  |  |  |                                                                                                                                                                                                                                                                                                                       |  |  |  |  |  |                                                                                                                                                                  |  |  |  |  |  |  |
| 2.1 Prior to death did the elder have a cohabiting partner with whom he/she lived but was not officially married?                                                                                                                                                                                                     | 1 yes 2 no<br>If yes, since ____ month ____year began to live together                                                                                                                                                                                                                                                                                                                                                                                                                                                                                                                                                                                                                                                                                                                                                                                                                                                                                                                                                                                                                                                                                                                                                                                                                 | <input type="checkbox"/><br><input type="checkbox"/> <input type="checkbox"/> <input type="checkbox"/> <input type="checkbox"/> , <input type="checkbox"/> <input type="checkbox"/> |           |            |                                       |            |                                       |                                                                                                                                                                                                                             |  |  |  |  |  |                             |  |  |  |  |  |                                                                                                                          |  |  |  |  |  |                                                                                                                                                                                                                                                                                                                       |  |  |  |  |  |                                                                                                                                                                  |  |  |  |  |  |  |
| 2.2. Prior to death did elder participate in the old-age insurance program?                                                                                                                                                                                                                                           | 1 yes 2 no                                                                                                                                                                                                                                                                                                                                                                                                                                                                                                                                                                                                                                                                                                                                                                                                                                                                                                                                                                                                                                                                                                                                                                                                                                                                             | <input type="checkbox"/>                                                                                                                                                            |           |            |                                       |            |                                       |                                                                                                                                                                                                                             |  |  |  |  |  |                             |  |  |  |  |  |                                                                                                                          |  |  |  |  |  |                                                                                                                                                                                                                                                                                                                       |  |  |  |  |  |                                                                                                                                                                  |  |  |  |  |  |  |
| 2.3. Every month how much pension did elder receive                                                                                                                                                                                                                                                                   | _____ yuan                                                                                                                                                                                                                                                                                                                                                                                                                                                                                                                                                                                                                                                                                                                                                                                                                                                                                                                                                                                                                                                                                                                                                                                                                                                                             | <input type="checkbox"/> <input type="checkbox"/> <input type="checkbox"/> <input type="checkbox"/> <input type="checkbox"/>                                                        |           |            |                                       |            |                                       |                                                                                                                                                                                                                             |  |  |  |  |  |                             |  |  |  |  |  |                                                                                                                          |  |  |  |  |  |                                                                                                                                                                                                                                                                                                                       |  |  |  |  |  |                                                                                                                                                                  |  |  |  |  |  |  |
| 2.4. Other household members living in the deceased persons' household prior to his/her death.<br><i>If age is unknown, please fill in 888.</i>                                                                                                                                                                       | <table border="1"> <thead> <tr> <th>Relationship with interviewee</th> <th>sex</th> <th>age</th> <th>education</th> <th>occupation</th> <th>Cigarettes smoked per day inside home</th> </tr> </thead> <tbody> <tr> <td colspan="6"><b>Relationship with interviewee:</b><br/>0 spouse 1 child 2 spouse of child 3 grandchild<br/>4 spouse of grandchild<br/>5 great grandchild or spouse of great grandchild<br/>6 sibling 7 parent or parent-in-law 8 other _____</td> </tr> <tr> <td colspan="6"><b>Sex:</b> 1 male 2 female</td> </tr> <tr> <td colspan="6"><b>Education level:</b><br/>1 Never attended school 2 Primary school<br/>3 Middle school 4 High school 5 College and above</td> </tr> <tr> <td colspan="6"><b>Occupation</b><br/>0 professional or technical personnel/doctors/teachers<br/>1 governmental, institutional or managerial personnel<br/>2 staff/service worker/industrial worker<br/>3 self-employer<br/>4 agriculture, forestry, animal husbandry, fishery<br/>5 housewife 6 military personnel<br/>7 unemployed 8 other</td> </tr> <tr> <td colspan="6"><b>Number of cigarettes other household member usually smokes per day inside home</b><br/>0 Don't smoke 1 More than 20/a pack 2 Less than a pack<br/>99 Don't know</td> </tr> </tbody> </table> | Relationship with interviewee                                                                                                                                                       | sex       | age        | education                             | occupation | Cigarettes smoked per day inside home | <b>Relationship with interviewee:</b><br>0 spouse 1 child 2 spouse of child 3 grandchild<br>4 spouse of grandchild<br>5 great grandchild or spouse of great grandchild<br>6 sibling 7 parent or parent-in-law 8 other _____ |  |  |  |  |  | <b>Sex:</b> 1 male 2 female |  |  |  |  |  | <b>Education level:</b><br>1 Never attended school 2 Primary school<br>3 Middle school 4 High school 5 College and above |  |  |  |  |  | <b>Occupation</b><br>0 professional or technical personnel/doctors/teachers<br>1 governmental, institutional or managerial personnel<br>2 staff/service worker/industrial worker<br>3 self-employer<br>4 agriculture, forestry, animal husbandry, fishery<br>5 housewife 6 military personnel<br>7 unemployed 8 other |  |  |  |  |  | <b>Number of cigarettes other household member usually smokes per day inside home</b><br>0 Don't smoke 1 More than 20/a pack 2 Less than a pack<br>99 Don't know |  |  |  |  |  |  |
| Relationship with interviewee                                                                                                                                                                                                                                                                                         | sex                                                                                                                                                                                                                                                                                                                                                                                                                                                                                                                                                                                                                                                                                                                                                                                                                                                                                                                                                                                                                                                                                                                                                                                                                                                                                    | age                                                                                                                                                                                 | education | occupation | Cigarettes smoked per day inside home |            |                                       |                                                                                                                                                                                                                             |  |  |  |  |  |                             |  |  |  |  |  |                                                                                                                          |  |  |  |  |  |                                                                                                                                                                                                                                                                                                                       |  |  |  |  |  |                                                                                                                                                                  |  |  |  |  |  |  |
| <b>Relationship with interviewee:</b><br>0 spouse 1 child 2 spouse of child 3 grandchild<br>4 spouse of grandchild<br>5 great grandchild or spouse of great grandchild<br>6 sibling 7 parent or parent-in-law 8 other _____                                                                                           |                                                                                                                                                                                                                                                                                                                                                                                                                                                                                                                                                                                                                                                                                                                                                                                                                                                                                                                                                                                                                                                                                                                                                                                                                                                                                        |                                                                                                                                                                                     |           |            |                                       |            |                                       |                                                                                                                                                                                                                             |  |  |  |  |  |                             |  |  |  |  |  |                                                                                                                          |  |  |  |  |  |                                                                                                                                                                                                                                                                                                                       |  |  |  |  |  |                                                                                                                                                                  |  |  |  |  |  |  |
| <b>Sex:</b> 1 male 2 female                                                                                                                                                                                                                                                                                           |                                                                                                                                                                                                                                                                                                                                                                                                                                                                                                                                                                                                                                                                                                                                                                                                                                                                                                                                                                                                                                                                                                                                                                                                                                                                                        |                                                                                                                                                                                     |           |            |                                       |            |                                       |                                                                                                                                                                                                                             |  |  |  |  |  |                             |  |  |  |  |  |                                                                                                                          |  |  |  |  |  |                                                                                                                                                                                                                                                                                                                       |  |  |  |  |  |                                                                                                                                                                  |  |  |  |  |  |  |
| <b>Education level:</b><br>1 Never attended school 2 Primary school<br>3 Middle school 4 High school 5 College and above                                                                                                                                                                                              |                                                                                                                                                                                                                                                                                                                                                                                                                                                                                                                                                                                                                                                                                                                                                                                                                                                                                                                                                                                                                                                                                                                                                                                                                                                                                        |                                                                                                                                                                                     |           |            |                                       |            |                                       |                                                                                                                                                                                                                             |  |  |  |  |  |                             |  |  |  |  |  |                                                                                                                          |  |  |  |  |  |                                                                                                                                                                                                                                                                                                                       |  |  |  |  |  |                                                                                                                                                                  |  |  |  |  |  |  |
| <b>Occupation</b><br>0 professional or technical personnel/doctors/teachers<br>1 governmental, institutional or managerial personnel<br>2 staff/service worker/industrial worker<br>3 self-employer<br>4 agriculture, forestry, animal husbandry, fishery<br>5 housewife 6 military personnel<br>7 unemployed 8 other |                                                                                                                                                                                                                                                                                                                                                                                                                                                                                                                                                                                                                                                                                                                                                                                                                                                                                                                                                                                                                                                                                                                                                                                                                                                                                        |                                                                                                                                                                                     |           |            |                                       |            |                                       |                                                                                                                                                                                                                             |  |  |  |  |  |                             |  |  |  |  |  |                                                                                                                          |  |  |  |  |  |                                                                                                                                                                                                                                                                                                                       |  |  |  |  |  |                                                                                                                                                                  |  |  |  |  |  |  |
| <b>Number of cigarettes other household member usually smokes per day inside home</b><br>0 Don't smoke 1 More than 20/a pack 2 Less than a pack<br>99 Don't know                                                                                                                                                      |                                                                                                                                                                                                                                                                                                                                                                                                                                                                                                                                                                                                                                                                                                                                                                                                                                                                                                                                                                                                                                                                                                                                                                                                                                                                                        |                                                                                                                                                                                     |           |            |                                       |            |                                       |                                                                                                                                                                                                                             |  |  |  |  |  |                             |  |  |  |  |  |                                                                                                                          |  |  |  |  |  |                                                                                                                                                                                                                                                                                                                       |  |  |  |  |  |                                                                                                                                                                  |  |  |  |  |  |  |
| 3 Main living arrangement in year prior to death? (choose one answer only)                                                                                                                                                                                                                                            | 1. Nursing home<br>2. Alone<br>3. With old spouse only<br>4. with married child (including grandchildren)<br>5. Other relative<br>8. Other (please note) _____                                                                                                                                                                                                                                                                                                                                                                                                                                                                                                                                                                                                                                                                                                                                                                                                                                                                                                                                                                                                                                                                                                                         | <input type="checkbox"/>                                                                                                                                                            |           |            |                                       |            |                                       |                                                                                                                                                                                                                             |  |  |  |  |  |                             |  |  |  |  |  |                                                                                                                          |  |  |  |  |  |                                                                                                                                                                                                                                                                                                                       |  |  |  |  |  |                                                                                                                                                                  |  |  |  |  |  |  |
| 4. Place of death                                                                                                                                                                                                                                                                                                     | 1. home 2. hospital 3. institution<br>4. other (please specify) _____                                                                                                                                                                                                                                                                                                                                                                                                                                                                                                                                                                                                                                                                                                                                                                                                                                                                                                                                                                                                                                                                                                                                                                                                                  | <input type="checkbox"/>                                                                                                                                                            |           |            |                                       |            |                                       |                                                                                                                                                                                                                             |  |  |  |  |  |                             |  |  |  |  |  |                                                                                                                          |  |  |  |  |  |                                                                                                                                                                                                                                                                                                                       |  |  |  |  |  |                                                                                                                                                                  |  |  |  |  |  |  |
| 5.1 Primary caregiver before dying (select one only)<br><br>(if answer is 8 or 9, please skip to question 6)                                                                                                                                                                                                          | 1. spouse<br>2. child(ren) and his/her/their spouse(s)<br>3. grandchild(ren) and his/her/their spouse(s)<br>4. other family member(s)<br>5. friend(s)<br>6. social service<br>7. housekeeper<br>8. nobody to take care<br>9. no need to take care                                                                                                                                                                                                                                                                                                                                                                                                                                                                                                                                                                                                                                                                                                                                                                                                                                                                                                                                                                                                                                      | <input type="checkbox"/>                                                                                                                                                            |           |            |                                       |            |                                       |                                                                                                                                                                                                                             |  |  |  |  |  |                             |  |  |  |  |  |                                                                                                                          |  |  |  |  |  |                                                                                                                                                                                                                                                                                                                       |  |  |  |  |  |                                                                                                                                                                  |  |  |  |  |  |  |

|                                                                                                                                                                                         |                                                                                                                                                                                                                                                |                                                                                                                                                                                                                                                                                                                                                                                                    |
|-----------------------------------------------------------------------------------------------------------------------------------------------------------------------------------------|------------------------------------------------------------------------------------------------------------------------------------------------------------------------------------------------------------------------------------------------|----------------------------------------------------------------------------------------------------------------------------------------------------------------------------------------------------------------------------------------------------------------------------------------------------------------------------------------------------------------------------------------------------|
| 5.1.1. Days of caregiving provided by the primary caregiver in the last month of life                                                                                                   | _____days                                                                                                                                                                                                                                      | <input type="checkbox"/> <input type="checkbox"/>                                                                                                                                                                                                                                                                                                                                                  |
| 5.2. Secondary caregiver before dying (select one only)<br><br>(if answer is 8 please skip to question 6)                                                                               | 1. Spouse<br>2. Child(ren) and his/her/their spouse(s)<br>3. Grandchild(ren) and his/her/their spouse(s)<br>4. Other family member(s)<br>5. Friend(s)<br>6. Social worker(s)<br>7. Housekeeper(s)<br>8. There is no second and third caregiver | <input type="checkbox"/>                                                                                                                                                                                                                                                                                                                                                                           |
| 5.2.1. Days of caregiving provided by the secondary caregiver in the last month of life                                                                                                 | _____days                                                                                                                                                                                                                                      | <input type="checkbox"/> <input type="checkbox"/>                                                                                                                                                                                                                                                                                                                                                  |
| 5.3. Third caregiver before death (select one only)                                                                                                                                     | 1. Spouse<br>2. Child(ren) and his/her/their spouse(s)<br>3. Grandchild(ren) and his/her/their spouse(s)<br>4. Other family member(s)<br>5. Friend(s)<br>6. Social worker(s)<br>7. Housekeeper(s)<br>8. There is no third caregiver            | <input type="checkbox"/>                                                                                                                                                                                                                                                                                                                                                                           |
| 5.3.1. Days of caregiving provided by the third caregiver in the last month of life                                                                                                     | _____days                                                                                                                                                                                                                                      | <input type="checkbox"/> <input type="checkbox"/>                                                                                                                                                                                                                                                                                                                                                  |
| 5.4. In general, how difficult was caregiving burden in the last month before dying for the family members (including yourself)?                                                        | 1. Very Exhausted 2. Quite Exhausted<br>3. Fair 4. Not at all<br>99. Don't know                                                                                                                                                                | <input type="checkbox"/>                                                                                                                                                                                                                                                                                                                                                                           |
| 6. Whether bedridden before dying                                                                                                                                                       | 1. no 2. yes. If yes, _____days                                                                                                                                                                                                                | <input type="checkbox"/> , <input type="checkbox"/> <input type="checkbox"/> <input type="checkbox"/> <input type="checkbox"/>                                                                                                                                                                                                                                                                     |
| 7-1. Since the last interview in 2014, how many times did the deceased elder suffer from serious illness that required hospitalization or caused him/her to be bedridden at home?       | (If no occurrences, fill 00. If bedridden the entire time, fill 88.)<br>_____time(s)                                                                                                                                                           | <input type="checkbox"/> <input type="checkbox"/>                                                                                                                                                                                                                                                                                                                                                  |
| 7-2 What kind of diseases did he/she suffer and for how many days being hospitalized or bedridden at home since last interview (please use the disease categories in question 8 below)? | first time _____ (disease), _____ days<br>second time _____ (disease), _____ days<br>third time _____ (disease), _____ days<br>(If more than three times, please ask for the last time.)                                                       | <input type="checkbox"/> <input type="checkbox"/> , <input type="checkbox"/> <input type="checkbox"/> <input type="checkbox"/><br><input type="checkbox"/> <input type="checkbox"/> , <input type="checkbox"/> <input type="checkbox"/> <input type="checkbox"/><br><input type="checkbox"/> <input type="checkbox"/> , <input type="checkbox"/> <input type="checkbox"/> <input type="checkbox"/> |
| 8 Did elder suffer from any of the following diseases:<br>0 no<br>1 yes                                                                                                                 | 01. Hypertension                                                                                                                                                                                                                               | <input type="checkbox"/>                                                                                                                                                                                                                                                                                                                                                                           |
|                                                                                                                                                                                         | 02. Diabetes                                                                                                                                                                                                                                   | <input type="checkbox"/>                                                                                                                                                                                                                                                                                                                                                                           |
|                                                                                                                                                                                         | 03. Heart Disease                                                                                                                                                                                                                              | <input type="checkbox"/>                                                                                                                                                                                                                                                                                                                                                                           |
|                                                                                                                                                                                         | 04. Stroke, CVD                                                                                                                                                                                                                                | <input type="checkbox"/>                                                                                                                                                                                                                                                                                                                                                                           |
|                                                                                                                                                                                         | 05. Bronchitis, emphysema, pneumonia, asthma                                                                                                                                                                                                   | <input type="checkbox"/>                                                                                                                                                                                                                                                                                                                                                                           |
|                                                                                                                                                                                         | 06. Tuberculosis                                                                                                                                                                                                                               | <input type="checkbox"/>                                                                                                                                                                                                                                                                                                                                                                           |
|                                                                                                                                                                                         | 07. Cataract                                                                                                                                                                                                                                   | <input type="checkbox"/>                                                                                                                                                                                                                                                                                                                                                                           |
|                                                                                                                                                                                         | 08. Glaucoma                                                                                                                                                                                                                                   | <input type="checkbox"/>                                                                                                                                                                                                                                                                                                                                                                           |
|                                                                                                                                                                                         | 09. Cancer                                                                                                                                                                                                                                     | <input type="checkbox"/>                                                                                                                                                                                                                                                                                                                                                                           |

|                                                                                   |                                                                                                                                                                                                                                                                                                                                                                                                                                                                                                                                                                                                                    |                                                                                                                              |
|-----------------------------------------------------------------------------------|--------------------------------------------------------------------------------------------------------------------------------------------------------------------------------------------------------------------------------------------------------------------------------------------------------------------------------------------------------------------------------------------------------------------------------------------------------------------------------------------------------------------------------------------------------------------------------------------------------------------|------------------------------------------------------------------------------------------------------------------------------|
|                                                                                   | 10. Prostate tumor                                                                                                                                                                                                                                                                                                                                                                                                                                                                                                                                                                                                 |                                                                                                                              |
|                                                                                   | 11. Gastric or duodenal ulcer                                                                                                                                                                                                                                                                                                                                                                                                                                                                                                                                                                                      | <input type="checkbox"/>                                                                                                     |
|                                                                                   | 12. Parkinson's Disease                                                                                                                                                                                                                                                                                                                                                                                                                                                                                                                                                                                            | <input type="checkbox"/>                                                                                                     |
|                                                                                   | 13. Bedsores                                                                                                                                                                                                                                                                                                                                                                                                                                                                                                                                                                                                       | <input type="checkbox"/>                                                                                                     |
|                                                                                   | 14. Arthritis                                                                                                                                                                                                                                                                                                                                                                                                                                                                                                                                                                                                      | <input type="checkbox"/>                                                                                                     |
|                                                                                   | 15. Dementia                                                                                                                                                                                                                                                                                                                                                                                                                                                                                                                                                                                                       | <input type="checkbox"/>                                                                                                     |
|                                                                                   | 16. Epilepsy                                                                                                                                                                                                                                                                                                                                                                                                                                                                                                                                                                                                       | <input type="checkbox"/>                                                                                                     |
|                                                                                   | 17. Cholecystitis, cholelith disease                                                                                                                                                                                                                                                                                                                                                                                                                                                                                                                                                                               | <input type="checkbox"/>                                                                                                     |
|                                                                                   | 18. Dyslipidemia                                                                                                                                                                                                                                                                                                                                                                                                                                                                                                                                                                                                   | <input type="checkbox"/>                                                                                                     |
|                                                                                   | 19. Rheumatism or rheumatoid disease                                                                                                                                                                                                                                                                                                                                                                                                                                                                                                                                                                               | <input type="checkbox"/>                                                                                                     |
|                                                                                   | 20. Chronic nephritis                                                                                                                                                                                                                                                                                                                                                                                                                                                                                                                                                                                              | <input type="checkbox"/>                                                                                                     |
|                                                                                   | 21. Mammary gland hyperplasia                                                                                                                                                                                                                                                                                                                                                                                                                                                                                                                                                                                      | <input type="checkbox"/>                                                                                                     |
|                                                                                   | 22. Uterine tumor                                                                                                                                                                                                                                                                                                                                                                                                                                                                                                                                                                                                  | <input type="checkbox"/>                                                                                                     |
|                                                                                   | 23. Prostatic hyperplasia                                                                                                                                                                                                                                                                                                                                                                                                                                                                                                                                                                                          | <input type="checkbox"/>                                                                                                     |
|                                                                                   | 24. Hepatitis                                                                                                                                                                                                                                                                                                                                                                                                                                                                                                                                                                                                      | <input type="checkbox"/>                                                                                                     |
| 25. Other (Please note)                                                           | <input type="checkbox"/>                                                                                                                                                                                                                                                                                                                                                                                                                                                                                                                                                                                           |                                                                                                                              |
| 9. What was the major cause of elder's death? (select one only)                   | 1 Infectious disease/parasitic disease<br>2 Neoplasm<br>3 Hematogenic organ or immune disease<br>4 Endocrine, nutrition, or metabolic disease<br>5 Mental and behavioral dysfunction<br>6 Nervous system disease<br>7 Eye and appendage disease<br>8 Ear and mastoid disease<br>9 Circulatory system disease<br>10 Respiratory system disease<br>11 Digestive system disease<br>12 Skin or subcutaneous tissue disease<br>13 Musculoskeletal system and connective tissue disease<br>14 Urogenital system disease<br>15 Injury, poisoning, accidental or other external causes<br>16 Other _____<br>99. Don't know | <input type="checkbox"/> <input type="checkbox"/>                                                                            |
| 10. Did the deceased elder get timely treatment when he/she was ill before dying? | 1.yes 2. no 3. was not ill                                                                                                                                                                                                                                                                                                                                                                                                                                                                                                                                                                                         | <input type="checkbox"/>                                                                                                     |
| 11. Main financial source before dying                                            | 1. retirement wage<br>2. spouse<br>3. child(ren)<br>4. grandchild(ren)<br>5. other relative(s)<br>6. local government or community<br>7. own work<br>8. other (please specify)_____                                                                                                                                                                                                                                                                                                                                                                                                                                | <input type="checkbox"/>                                                                                                     |
| 12. Household annual income per capita in the year before dying                   | _____ Yuan (RMB)                                                                                                                                                                                                                                                                                                                                                                                                                                                                                                                                                                                                   | <input type="checkbox"/> <input type="checkbox"/> <input type="checkbox"/> <input type="checkbox"/> <input type="checkbox"/> |
| 13. Were the following facilities available in the elder's home before            | 1. toilet                      0 no      1 yes<br>2. tap water                    0 no      1 yes                                                                                                                                                                                                                                                                                                                                                                                                                                                                                                                  | <input type="checkbox"/><br><input type="checkbox"/>                                                                         |

|                                                                                                                                                                           |                                                                                                                                                                                                                                                                          |                                                                                                                                                                                                         |  |  |  |  |  |  |  |  |  |  |
|---------------------------------------------------------------------------------------------------------------------------------------------------------------------------|--------------------------------------------------------------------------------------------------------------------------------------------------------------------------------------------------------------------------------------------------------------------------|---------------------------------------------------------------------------------------------------------------------------------------------------------------------------------------------------------|--|--|--|--|--|--|--|--|--|--|
| he/she died?                                                                                                                                                              | 3. bathing/showering facility    0 no    1 yes<br>4. heater(heating system)    0 no    1 yes<br>5. TV    0 no    1 yes<br>6. washing machine    0 no    1 yes<br>7. telephone    0 no    1 yes                                                                           | <input type="checkbox"/><br><input type="checkbox"/><br><input type="checkbox"/><br><input type="checkbox"/><br><input type="checkbox"/>                                                                |  |  |  |  |  |  |  |  |  |  |
| 14. Was there a doctor in the village?<br>(refers to rural deceased elders only)                                                                                          | 1. no 2. yes<br>If yes, village doctor was:<br>1. licensed with college degree<br>2. licensed without college degree<br>3. unlicensed                                                                                                                                    | <input type="checkbox"/><br><input type="checkbox"/>                                                                                                                                                    |  |  |  |  |  |  |  |  |  |  |
| 15. Mainly who paid the medical costs<br>for the deceased elder?                                                                                                          | 01. state Medicare fund<br>02. the deceased elder<br>03. spouse<br>04. child(ren)<br>05. cooperate Medicare fund<br>06. state or collective subsidy<br>07. medical insurance<br>08. no money to pay medical costs<br>09. was not ill<br>10. other (please specify) _____ | <input type="checkbox"/> <input type="checkbox"/>                                                                                                                                                       |  |  |  |  |  |  |  |  |  |  |
| 16. Total medical costs of the deceased<br>elder in the last year of life                                                                                                 | _____ Yuan (RMB)<br>in the cost, how much self-paid _____                                                                                                                                                                                                                | <table border="1" style="display: inline-table; vertical-align: middle;"><tr><td> </td><td> </td><td> </td><td> </td><td> </td></tr><tr><td> </td><td> </td><td> </td><td> </td><td> </td></tr></table> |  |  |  |  |  |  |  |  |  |  |
|                                                                                                                                                                           |                                                                                                                                                                                                                                                                          |                                                                                                                                                                                                         |  |  |  |  |  |  |  |  |  |  |
|                                                                                                                                                                           |                                                                                                                                                                                                                                                                          |                                                                                                                                                                                                         |  |  |  |  |  |  |  |  |  |  |
| 17-1. Functioning in bathing before<br>dying                                                                                                                              | 1. fully independent.<br>2. partially dependent. Days lasted _____<br>3. fully dependent. Days lasted _____                                                                                                                                                              | <input type="checkbox"/> <input type="checkbox"/> <input type="checkbox"/> <input type="checkbox"/> <input type="checkbox"/>                                                                            |  |  |  |  |  |  |  |  |  |  |
| 17-2. Functioning in dressing before<br>dying                                                                                                                             | 1. fully independent.<br>2. partially dependent. Days lasted _____<br>3. fully dependent. Days lasted _____                                                                                                                                                              | <input type="checkbox"/> <input type="checkbox"/> <input type="checkbox"/> <input type="checkbox"/> <input type="checkbox"/>                                                                            |  |  |  |  |  |  |  |  |  |  |
| 17-3. Functioning in using toilet before<br>dying                                                                                                                         | 1. fully independent.<br>2. partially dependent. Days lasted _____<br>3. fully dependent. Days lasted _____                                                                                                                                                              | <input type="checkbox"/> <input type="checkbox"/> <input type="checkbox"/> <input type="checkbox"/> <input type="checkbox"/>                                                                            |  |  |  |  |  |  |  |  |  |  |
| 17-4. Functioning in indoor<br>transferring before dying:                                                                                                                 | 1. fully independent.<br>2. partially dependent. Days lasted _____<br>3. fully dependent. Days lasted _____                                                                                                                                                              | <input type="checkbox"/> <input type="checkbox"/> <input type="checkbox"/> <input type="checkbox"/> <input type="checkbox"/>                                                                            |  |  |  |  |  |  |  |  |  |  |
| 17-5. Functioning in continence before<br>dying                                                                                                                           | 1. able to control.<br>2. occasional accidents. Days lasted _____<br>3. catheter was used or was incontinent. Days<br>lasted _____                                                                                                                                       | <input type="checkbox"/> <input type="checkbox"/> <input type="checkbox"/> <input type="checkbox"/> <input type="checkbox"/>                                                                            |  |  |  |  |  |  |  |  |  |  |
| 17-6. Functioning in self-feeding<br>before dying                                                                                                                         | 1. fully independent.<br>2. partially dependent. Days lasted _____<br>3. fully dependent. Days lasted _____                                                                                                                                                              | <input type="checkbox"/> <input type="checkbox"/> <input type="checkbox"/> <input type="checkbox"/> <input type="checkbox"/>                                                                            |  |  |  |  |  |  |  |  |  |  |
| 17-7. Days in fully dependent<br>functioning before dying                                                                                                                 | _____ days                                                                                                                                                                                                                                                               | <input type="checkbox"/> <input type="checkbox"/> <input type="checkbox"/> <input type="checkbox"/> <input type="checkbox"/>                                                                            |  |  |  |  |  |  |  |  |  |  |
| 17-8. Total cost for the caregiving<br>(includes nursing, cost for labor hours<br>lost, costs for home visits and, and so<br>on, but excluding cost for<br>prescriptions) | _____ Yuan (RMB)<br>(fill 99998, if more than 100,000)                                                                                                                                                                                                                   | <input type="checkbox"/> <input type="checkbox"/> <input type="checkbox"/> <input type="checkbox"/> <input type="checkbox"/> <input type="checkbox"/>                                                   |  |  |  |  |  |  |  |  |  |  |
| 17-9. Direct cost for the caregiving<br>(includes nursing, costs for home visits<br>and, but excluding cost for labor hours<br>lost and cost for prescriptions)           | _____ Yuan (RMB)<br>(fill 99998, if more than 100,000)                                                                                                                                                                                                                   | <input type="checkbox"/> <input type="checkbox"/> <input type="checkbox"/> <input type="checkbox"/> <input type="checkbox"/> <input type="checkbox"/>                                                   |  |  |  |  |  |  |  |  |  |  |
| 17-10. Who mainly paid those care                                                                                                                                         | 1 medical insurance 2 elder self                                                                                                                                                                                                                                         | <input type="checkbox"/>                                                                                                                                                                                |  |  |  |  |  |  |  |  |  |  |

|                                                                                                       |                                                                                                                                                                                                                                                                                                                 |                                                                                                       |
|-------------------------------------------------------------------------------------------------------|-----------------------------------------------------------------------------------------------------------------------------------------------------------------------------------------------------------------------------------------------------------------------------------------------------------------|-------------------------------------------------------------------------------------------------------|
| costs?                                                                                                | 3 spouse 4 children/grandchild<br>5 state/collectives 6 other_____                                                                                                                                                                                                                                              |                                                                                                       |
| 18. How many days before dying did the elder stay in bed longer than being out of bed in the daytime? | _____ days                                                                                                                                                                                                                                                                                                      | <input type="checkbox"/> <input type="checkbox"/> <input type="checkbox"/>                            |
| 19. Did the deceased elder smoke since the last interview?                                            | 1. no 2. yes;<br>If yes, _____ time(s) /per day                                                                                                                                                                                                                                                                 | <input type="checkbox"/> , <input type="checkbox"/> <input type="checkbox"/>                          |
| <b>Tobacco - Nicotine Dependence</b>                                                                  |                                                                                                                                                                                                                                                                                                                 |                                                                                                       |
| 20-1. Did the deceased elder drink alcohol since the last interview?                                  | 1. no 2. yes                                                                                                                                                                                                                                                                                                    | <input type="checkbox"/>                                                                              |
| 20-2. If so, what kind of alcohol?                                                                    | 1. very strong liquor 2. not very strong liquor<br>3. wine 4. rice wine<br>5. beer 6. other (specify)_____                                                                                                                                                                                                      | <input type="checkbox"/>                                                                              |
| 20-3. How much alcohol did the deceased elder drink per day?                                          | _____ liang                                                                                                                                                                                                                                                                                                     | <input type="checkbox"/> <input type="checkbox"/>                                                     |
| 21. Did the deceased elder give some advance directives?                                              | 1. no 2. yes; if yes, _____ days before death                                                                                                                                                                                                                                                                   | <input type="checkbox"/> , <input type="checkbox"/> <input type="checkbox"/> <input type="checkbox"/> |
| 22. Did the deceased elder ever tell you or other people about his/her dream of death?                | 1 no 2. yes 3. do not know                                                                                                                                                                                                                                                                                      | <input type="checkbox"/>                                                                              |
| 23. Did the deceased elder feel painful when death was coming?                                        | 1. very painful 2. relatively painful 3. so so 4. relatively peaceful 5. very peaceful 6. difficult to say                                                                                                                                                                                                      | <input type="checkbox"/>                                                                              |
| 24. Was the deceased elder unconscious before dying?                                                  | 1. no 2. yes; if yes, _____days unconscious                                                                                                                                                                                                                                                                     | <input type="checkbox"/> , <input type="checkbox"/> <input type="checkbox"/>                          |
| <b>Hearing loss</b>                                                                                   |                                                                                                                                                                                                                                                                                                                 |                                                                                                       |
| 25. Did the deceased elder have any difficulty with his/her hearing?                                  | 1 yes<br>2 no— <i>skip to C-1</i><br>9 Don't know.                                                                                                                                                                                                                                                              | <input type="checkbox"/>                                                                              |
| 26. In which ear(s) did the deceased elder have hearing difficulty?                                   | 1 left 2 right 3 both<br>9 Don't know.                                                                                                                                                                                                                                                                          | <input type="checkbox"/>                                                                              |
| 27. At what age did the deceased elder first notice a hearing difficulty?                             | 1 He/she had a hearing difficulty since he/she was born<br>2 His/her hearing difficulty developed during his/her childhood years (before the age of 15)<br>3 His/her hearing difficulty developed between the ages of 15 and 40<br>4 His/her hearing difficulty developed after the age of 40.<br>9 Don't know. | <input type="checkbox"/>                                                                              |
| 28. How quickly did the deceased elder's hearing difficulty develop?                                  | 1 Suddenly (over a few days)<br>2 Over a few months<br>3 Over several years<br>9 Don't know.                                                                                                                                                                                                                    | <input type="checkbox"/>                                                                              |

| <b>INFORMANT Questionnaire on Cognitive Decline for the deceased elderly in their last month of life (adopted from IQCODE scale of HRS/CHARLS)</b>                                |                                                                    | Code                     |
|-----------------------------------------------------------------------------------------------------------------------------------------------------------------------------------|--------------------------------------------------------------------|--------------------------|
| We hope you can remember the cognitive capacity of the deceased elder in the period of three-to-six months before death (must be answered by the INFORMANT, i.e. a family member) |                                                                    |                          |
| C-1 Could he or she remember his or her family members' and friends' faces?                                                                                                       | 1. Could      2. Could not<br>3. Don't know    9. refuse to answer | <input type="checkbox"/> |
| *C-2 Could he or she remember his or her family member's and friends' names?                                                                                                      | 1. Could      2. Could not<br>3. Don't know    9. Refuse to answer | <input type="checkbox"/> |
| *C-3 Could he or she remember his or her family members' and friends' addresses?                                                                                                  | 1. Could      2. Could not<br>3. Don't know    9. Refuse to answer | <input type="checkbox"/> |
| C-4 Could he or she remember things that happened recently?                                                                                                                       | 1. Could      2. Could not<br>3. Don't know    9. Refuse to answer | <input type="checkbox"/> |
| C-5 Could he or she recall conversations from a few days ago?                                                                                                                     | 1. Could      2. Could not<br>3. Don't know    9. Refuse to answer | <input type="checkbox"/> |
| C-6 Did he or she forget what to say when he or she talked in the middle of speaking?                                                                                             | 1. Did so      2. Did not<br>3. Don't know    9. Refuse to answer  | <input type="checkbox"/> |
| C-7 Could he or she remember his or her home address and telephone number?                                                                                                        | 1. Could      2. Could not<br>3. Don't know    9. Refuse to answer | <input type="checkbox"/> |
| C-8 Could he or she remember what day and month it was?                                                                                                                           | 1. Could      2. Could not<br>3. Don't know    9. Refuse to answer | <input type="checkbox"/> |
| C-9 Could he or she remember where his or her often-used things were usually kept?                                                                                                | 1. Could      2. Could not<br>3. Don't know    9. Refuse to answer | <input type="checkbox"/> |
| C-10 Could he or she remember where to find things which have been put in a different place from usual?                                                                           | 1. Could      2. Could not<br>3. Don't know    9. Refuse to answer | <input type="checkbox"/> |
| C-11 Could he or she adapt to new things in general?                                                                                                                              | 1. Could      2. Could not<br>3. Don't know    9. Refuse to answer | <input type="checkbox"/> |
| C-12 Could he or she know how to use household appliances (e.g. television or hammer)?                                                                                            | 1. Could      2. Could not<br>3. Don't know    9. Refuse to answer | <input type="checkbox"/> |
| C-13 Could he or she learn to use new household appliances?                                                                                                                       | 1. Could      2. Could not<br>3. Don't know    9. Refuse to answer | <input type="checkbox"/> |
| C-14 Could he or she remember things in childhood or his/her youth ?                                                                                                              | 1. Could      2. Could not<br>3. Don't know    9. Refuse to answer | <input type="checkbox"/> |
| C-15 Could he or she understand a story on the TV?                                                                                                                                | 1. Could      2. Could not<br>3. Don't know    9. Refuse to answer | <input type="checkbox"/> |
| C-16 Could he or she express his or her own thoughts by talking to other people?                                                                                                  | 1. Could      2. Could not<br>3. Don't know    9. Refuse to answer | <input type="checkbox"/> |
| C-17 Did he or she know about some important historical events?                                                                                                                   | 1. Could      2. Could not<br>3. Don't know    9. Refuse to answer | <input type="checkbox"/> |
| C-18 Could he or she make decisions on everyday matters?                                                                                                                          | 1. Could      2. Could not<br>3. Don't know    9. Refuse to answer | <input type="checkbox"/> |
| C-19 Could he or she handle money for shopping?                                                                                                                                   | 1. Could      2. Could not<br>3. Don't know    9. Refuse to answer | <input type="checkbox"/> |

|                                                                                               |                                                                      |                          |
|-----------------------------------------------------------------------------------------------|----------------------------------------------------------------------|--------------------------|
| C-20 Could he or she handle financial matters (e.g. the pension, dealing with the bank)?      | 1. Could      2. Could not<br>3. Don't know      9. Refuse to answer | <input type="checkbox"/> |
| C-21 Could he or she handle everyday arithmetic problems (e.g. knowing how much food to buy)? | 1. Could      2. Could not<br>3. Don't know      9. Refuse to answer | <input type="checkbox"/> |
| C-22 Could he or she understand what is happening and figure out how to handle it properly?   | 1. Could      2. Could not<br>3. Don't know      9. Refuse to answer | <input type="checkbox"/> |
