# Supplementary material for: Lifestyle and ADL Are Prioritized Factors Influencing All-Cause Mortality Risk Among Oldest Old: A Population-Based Cohort Study
Source: PubMed Central journal article supplement — Inquiry. 2024 Feb 27;61:00469580241235755. doi: 10.1177/00469580241235755 (PMC10901056; doi:10.1177/00469580241235755), 2024-02-27
Supplement: sj-pdf-2-inq-10.1177_00469580241235755.pdf [file sj-pdf-2-inq-10.1177_00469580241235755.pdf]

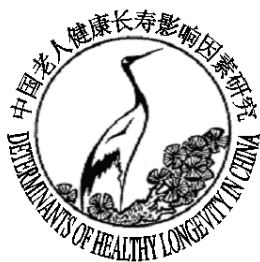

Interviews are based on voluntary participation

## Questionnaire for Interviews to the Surviving Participants (8th wave in 2017-2018)

Notes:

- (1) The shaded questions about characteristics that do not change such as education, occupation before retirement, childhood conditions and information about the history of the life course will not be asked again in the follow-up interviews for those previously recruited participants.
- (2) As compared with CLHLS previous waves' questionnaires, several questions were newly added PhenX measures closely related to healthy aging. They will be asked for all interviewees including previously and newly recruited participants.

### Guarantee for interviewee

*All individual information collected in this survey will be treated as strictly confidential. The record of your name and address will be used only in future follow-up surveys to enable us to contact with you. The computerized data resulting from this survey will not include your name and address. So, nobody will be able to identify any interviewee from the computerized data files. All of the questionnaires will be stored in the locked files containers.*

Questionnaire No.

       

Code within province (the four digit in the middle)

   

Note: the first two digits is provincial code (such as 11 for Beijing, 31 for Shanghai), the last two digits is the year of the first interview, and the four digit in the middle is the given code within province

Interviewee's name: \_\_\_\_\_

Current Address: \_\_\_\_\_

detailed village or street address (including street, apartment #, etc.)

\_\_\_\_\_ district or township    \_\_\_\_\_ county or city    \_\_\_\_\_ province

Post Code:

Tel No: \_\_\_\_\_

Contact person: \_\_\_\_\_

Tel. No. of Community Office \_\_\_\_\_

Person to contact at Community Office \_\_\_\_\_

### Interview Record

| Date and time of interview |     |            |          | Reasons for not finishing questionnaire     |                            |                                 |         |
|----------------------------|-----|------------|----------|---------------------------------------------|----------------------------|---------------------------------|---------|
| month                      | day | start time | end time | 1 the interviewee refused to be interviewed | 2 the interviewee has died | 3 the interviewee has emigrated | 4 other |
|                            |     |            |          |                                             |                            |                                 |         |
|                            |     |            |          |                                             |                            |                                 |         |
|                            |     |            |          |                                             |                            |                                 |         |

**Signature and date** (month and day):

Interviewer \_\_\_\_\_; check at city level \_\_\_\_\_;

check at provincial level \_\_\_\_\_; check in Beijing \_\_\_\_\_.

Category of interviewee

- I. Category of the interviewee:
- 1 Follow-up interviewee      2 Newly recruited interviewee.
- II. Current type of household registration (*hukou*) 1 Urban    2 Rural
- (Note: For where the type of *hukou* changed to “residential household” for both urban and rural residents, select the type of *hukou* before the change.)
- III. 1 Current residence area of interviewee      1 city      2 town      3 rural
- 2 How many years has the interviewee resided in current place
- IV. validated age (See H5)

General Instructions to interviewer

1. All questions marked with a ‘\*’ must be answered, if possible. The answers must come from the interviewees themselves, i.e., these questions may not be answered by other people. If the interviewee is not able to answer a question, please circle ‘not able to answer’. In addition, interviewers should encourage the elders to attempt to answer as many of the other questions (those without a ‘\*’) as possible.
2. If some of the questions without a ‘\*’ cannot be answered by the elders themselves, interviewers should ask their closest relative(s) or caregiver(s) to answer them. (The box ○ in the third column is to be checked whenever the question is not answered by the interviewee.) If no one can answer the question, please explain why in the margin.
3. Detailed instructions (including illustrations of definitions, how to measure, examples, etc.) are presented in the interviewers instruction booklet (in easily understandable Chinese language).
4. Interviewees who newly join the survey should attempt to answer all questions, including those appearing on a shaded background. Those who were interviewed in the previous survey should attempt to answer only the questions that do not appear on a shaded background.

| A. BASIC INFORMATION                                                               |                                                                                                                                                                        |   | Code                                                                                                                                                     |
|------------------------------------------------------------------------------------|------------------------------------------------------------------------------------------------------------------------------------------------------------------------|---|----------------------------------------------------------------------------------------------------------------------------------------------------------|
| A1 Sex                                                                             | 1 Male    2 Female                                                                                                                                                     | ○ | <input type="checkbox"/>                                                                                                                                 |
| If interviewee had 2014 visit, verify if it agrees with the name list              | 1 The same as in the list<br>2 Not the same                                                                                                                            |   | <input type="checkbox"/>                                                                                                                                 |
| A2 Ethnic group                                                                    | 1 Han    2 Hui    3 Zhuang    4 Yao<br>5 Korean    6 Manchu    7 Mongolia<br>8 Other                                                                                   | ○ | <input type="checkbox"/>                                                                                                                                 |
| A3 Current Age                                                                     | _____                                                                                                                                                                  | ○ | <input type="checkbox"/> <input type="checkbox"/> <input type="checkbox"/>                                                                               |
| A3.1 Animal year of interviewee’s birth                                            | 1 rat    2 ox    3 tiger      4 rabbit<br>5 dragon    6 snake    7 horse<br>8 sheep      9 monkey    10 rooster<br>11 dog      12 boar<br>The birth year matched _____ | ○ | <input type="checkbox"/> <input type="checkbox"/><br><input type="checkbox"/> <input type="checkbox"/> <input type="checkbox"/> <input type="checkbox"/> |
| If interviewee had 2014 visit, verify if the animal year agrees with the name list | 1 the same as in the list<br>2 not the same                                                                                                                            |   | <input type="checkbox"/>                                                                                                                                 |

|                                                                               |                                                                                                |                       |                                                                                                                                                                                                                                                                                                                |
|-------------------------------------------------------------------------------|------------------------------------------------------------------------------------------------|-----------------------|----------------------------------------------------------------------------------------------------------------------------------------------------------------------------------------------------------------------------------------------------------------------------------------------------------------|
| A3.2 Date of birth:<br>(a) Chinese calendar<br>(b) Western calendar           | year _____ month _____<br>year _____ month _____                                               | <input type="radio"/> | <input type="checkbox"/> <input type="checkbox"/> <input type="checkbox"/> <input type="checkbox"/> <input type="checkbox"/> <input type="checkbox"/><br><input type="checkbox"/> <input type="checkbox"/> <input type="checkbox"/> <input type="checkbox"/> <input type="checkbox"/> <input type="checkbox"/> |
| If interviewee had 2014 visit, verify if it agrees with the name list         | 1 the same as in the list<br>2 not the same                                                    |                       | <input type="checkbox"/>                                                                                                                                                                                                                                                                                       |
| A4.1 In which province were you born?                                         | province _____                                                                                 | <input type="radio"/> | <input type="checkbox"/> <input type="checkbox"/>                                                                                                                                                                                                                                                              |
| A4.2 In which county (city) were you born?                                    | 1 same as current address<br>2 other city or county                                            | <input type="radio"/> | <input type="checkbox"/>                                                                                                                                                                                                                                                                                       |
| A4.3 Was the place of birth an urban area or a rural area (at time of birth)? | 1 urban 2 rural                                                                                | <input type="radio"/> | <input type="checkbox"/>                                                                                                                                                                                                                                                                                       |
| A5.1 Co-residence                                                             | 1 with household member(s)<br>2 alone---skip to A5.3.0<br>3 in a nursing home---skip to A5.4.1 | <input type="radio"/> | <input type="checkbox"/>                                                                                                                                                                                                                                                                                       |
| A5.2 How many people are living with you? (excluding yourself)                | _____ person(s)                                                                                | <input type="radio"/> | <input type="checkbox"/> <input type="checkbox"/>                                                                                                                                                                                                                                                              |

**Current Environmental Tobacco Smoke Exposure (Phenx Code: 060700)**

| A5.3 Other members of your household<br>(Use back of paper for additional people, if necessary.)<br>If age is unknown, please fill in '88'.<br>Relationship with interviewee: | Relationship with interviewee | sex                      | age                                                                                                 | Education                | Cigarettes smoked per day inside home | Relationship with interviewee | sex                      | age                                                                                                 | Education                | Cigarettes smoked per day                                                  |
|-------------------------------------------------------------------------------------------------------------------------------------------------------------------------------|-------------------------------|--------------------------|-----------------------------------------------------------------------------------------------------|--------------------------|---------------------------------------|-------------------------------|--------------------------|-----------------------------------------------------------------------------------------------------|--------------------------|----------------------------------------------------------------------------|
| 0 spouse                                                                                                                                                                      | <input type="radio"/>         | <input type="checkbox"/> | <input type="checkbox"/> <input type="checkbox"/> <input type="checkbox"/> <input type="checkbox"/> | <input type="checkbox"/> | <input type="checkbox"/>              | <input type="checkbox"/>      | <input type="checkbox"/> | <input type="checkbox"/> <input type="checkbox"/> <input type="checkbox"/> <input type="checkbox"/> | <input type="checkbox"/> | <input type="checkbox"/> <input type="checkbox"/> <input type="checkbox"/> |
| 1 child                                                                                                                                                                       | <input type="radio"/>         | <input type="checkbox"/> | <input type="checkbox"/> <input type="checkbox"/> <input type="checkbox"/> <input type="checkbox"/> | <input type="checkbox"/> | <input type="checkbox"/>              | <input type="checkbox"/>      | <input type="checkbox"/> | <input type="checkbox"/> <input type="checkbox"/> <input type="checkbox"/> <input type="checkbox"/> | <input type="checkbox"/> | <input type="checkbox"/> <input type="checkbox"/> <input type="checkbox"/> |
| 2 spouse of child                                                                                                                                                             | <input type="radio"/>         | <input type="checkbox"/> | <input type="checkbox"/> <input type="checkbox"/> <input type="checkbox"/> <input type="checkbox"/> | <input type="checkbox"/> | <input type="checkbox"/>              | <input type="checkbox"/>      | <input type="checkbox"/> | <input type="checkbox"/> <input type="checkbox"/> <input type="checkbox"/> <input type="checkbox"/> | <input type="checkbox"/> | <input type="checkbox"/> <input type="checkbox"/> <input type="checkbox"/> |
| 3 grandchild                                                                                                                                                                  | <input type="radio"/>         | <input type="checkbox"/> | <input type="checkbox"/> <input type="checkbox"/> <input type="checkbox"/> <input type="checkbox"/> | <input type="checkbox"/> | <input type="checkbox"/>              | <input type="checkbox"/>      | <input type="checkbox"/> | <input type="checkbox"/> <input type="checkbox"/> <input type="checkbox"/> <input type="checkbox"/> | <input type="checkbox"/> | <input type="checkbox"/> <input type="checkbox"/> <input type="checkbox"/> |
| 4 spouse of grandchild                                                                                                                                                        | <input type="radio"/>         | <input type="checkbox"/> | <input type="checkbox"/> <input type="checkbox"/> <input type="checkbox"/> <input type="checkbox"/> | <input type="checkbox"/> | <input type="checkbox"/>              | <input type="checkbox"/>      | <input type="checkbox"/> | <input type="checkbox"/> <input type="checkbox"/> <input type="checkbox"/> <input type="checkbox"/> | <input type="checkbox"/> | <input type="checkbox"/> <input type="checkbox"/> <input type="checkbox"/> |
| 5 great grandchild or spouse of great grandchild                                                                                                                              | <input type="radio"/>         | <input type="checkbox"/> | <input type="checkbox"/> <input type="checkbox"/> <input type="checkbox"/> <input type="checkbox"/> | <input type="checkbox"/> | <input type="checkbox"/>              | <input type="checkbox"/>      | <input type="checkbox"/> | <input type="checkbox"/> <input type="checkbox"/> <input type="checkbox"/> <input type="checkbox"/> | <input type="checkbox"/> | <input type="checkbox"/> <input type="checkbox"/> <input type="checkbox"/> |
| 6 sibling                                                                                                                                                                     | <input type="radio"/>         | <input type="checkbox"/> | <input type="checkbox"/> <input type="checkbox"/> <input type="checkbox"/> <input type="checkbox"/> | <input type="checkbox"/> | <input type="checkbox"/>              | <input type="checkbox"/>      | <input type="checkbox"/> | <input type="checkbox"/> <input type="checkbox"/> <input type="checkbox"/> <input type="checkbox"/> | <input type="checkbox"/> | <input type="checkbox"/> <input type="checkbox"/> <input type="checkbox"/> |
| 7 parent or parent-in-law                                                                                                                                                     | <input type="radio"/>         | <input type="checkbox"/> | <input type="checkbox"/> <input type="checkbox"/> <input type="checkbox"/> <input type="checkbox"/> | <input type="checkbox"/> | <input type="checkbox"/>              | <input type="checkbox"/>      | <input type="checkbox"/> | <input type="checkbox"/> <input type="checkbox"/> <input type="checkbox"/> <input type="checkbox"/> | <input type="checkbox"/> | <input type="checkbox"/> <input type="checkbox"/> <input type="checkbox"/> |
| 8 other _____                                                                                                                                                                 | <input type="radio"/>         | <input type="checkbox"/> | <input type="checkbox"/> <input type="checkbox"/> <input type="checkbox"/> <input type="checkbox"/> | <input type="checkbox"/> | <input type="checkbox"/>              | <input type="checkbox"/>      | <input type="checkbox"/> | <input type="checkbox"/> <input type="checkbox"/> <input type="checkbox"/> <input type="checkbox"/> | <input type="checkbox"/> | <input type="checkbox"/> <input type="checkbox"/> <input type="checkbox"/> |
| <u>Sex</u> : 1 male 2 female                                                                                                                                                  | <input type="radio"/>         | <input type="checkbox"/> | <input type="checkbox"/> <input type="checkbox"/> <input type="checkbox"/> <input type="checkbox"/> | <input type="checkbox"/> | <input type="checkbox"/>              | <input type="checkbox"/>      | <input type="checkbox"/> | <input type="checkbox"/> <input type="checkbox"/> <input type="checkbox"/> <input type="checkbox"/> | <input type="checkbox"/> | <input type="checkbox"/> <input type="checkbox"/> <input type="checkbox"/> |
| <u>Education level</u> :                                                                                                                                                      | <input type="radio"/>         | <input type="checkbox"/> | <input type="checkbox"/> <input type="checkbox"/> <input type="checkbox"/> <input type="checkbox"/> | <input type="checkbox"/> | <input type="checkbox"/>              | <input type="checkbox"/>      | <input type="checkbox"/> | <input type="checkbox"/> <input type="checkbox"/> <input type="checkbox"/> <input type="checkbox"/> | <input type="checkbox"/> | <input type="checkbox"/> <input type="checkbox"/> <input type="checkbox"/> |
| 0 Never attended school                                                                                                                                                       | <input type="radio"/>         | <input type="checkbox"/> | <input type="checkbox"/> <input type="checkbox"/> <input type="checkbox"/> <input type="checkbox"/> | <input type="checkbox"/> | <input type="checkbox"/>              | <input type="checkbox"/>      | <input type="checkbox"/> | <input type="checkbox"/> <input type="checkbox"/> <input type="checkbox"/> <input type="checkbox"/> | <input type="checkbox"/> | <input type="checkbox"/> <input type="checkbox"/> <input type="checkbox"/> |
| 1 Some primary                                                                                                                                                                | <input type="radio"/>         | <input type="checkbox"/> | <input type="checkbox"/> <input type="checkbox"/> <input type="checkbox"/> <input type="checkbox"/> | <input type="checkbox"/> | <input type="checkbox"/>              | <input type="checkbox"/>      | <input type="checkbox"/> | <input type="checkbox"/> <input type="checkbox"/> <input type="checkbox"/> <input type="checkbox"/> | <input type="checkbox"/> | <input type="checkbox"/> <input type="checkbox"/> <input type="checkbox"/> |
| 2 Primary school                                                                                                                                                              | <input type="radio"/>         | <input type="checkbox"/> | <input type="checkbox"/> <input type="checkbox"/> <input type="checkbox"/> <input type="checkbox"/> | <input type="checkbox"/> | <input type="checkbox"/>              | <input type="checkbox"/>      | <input type="checkbox"/> | <input type="checkbox"/> <input type="checkbox"/> <input type="checkbox"/> <input type="checkbox"/> | <input type="checkbox"/> | <input type="checkbox"/> <input type="checkbox"/> <input type="checkbox"/> |
| 3 Middle school                                                                                                                                                               | <input type="radio"/>         | <input type="checkbox"/> | <input type="checkbox"/> <input type="checkbox"/> <input type="checkbox"/> <input type="checkbox"/> | <input type="checkbox"/> | <input type="checkbox"/>              | <input type="checkbox"/>      | <input type="checkbox"/> | <input type="checkbox"/> <input type="checkbox"/> <input type="checkbox"/> <input type="checkbox"/> | <input type="checkbox"/> | <input type="checkbox"/> <input type="checkbox"/> <input type="checkbox"/> |
| 4 High school                                                                                                                                                                 | <input type="radio"/>         | <input type="checkbox"/> | <input type="checkbox"/> <input type="checkbox"/> <input type="checkbox"/> <input type="checkbox"/> | <input type="checkbox"/> | <input type="checkbox"/>              | <input type="checkbox"/>      | <input type="checkbox"/> | <input type="checkbox"/> <input type="checkbox"/> <input type="checkbox"/> <input type="checkbox"/> | <input type="checkbox"/> | <input type="checkbox"/> <input type="checkbox"/> <input type="checkbox"/> |
| 5 Associate college                                                                                                                                                           | <input type="radio"/>         | <input type="checkbox"/> | <input type="checkbox"/> <input type="checkbox"/> <input type="checkbox"/> <input type="checkbox"/> | <input type="checkbox"/> | <input type="checkbox"/>              | <input type="checkbox"/>      | <input type="checkbox"/> | <input type="checkbox"/> <input type="checkbox"/> <input type="checkbox"/> <input type="checkbox"/> | <input type="checkbox"/> | <input type="checkbox"/> <input type="checkbox"/> <input type="checkbox"/> |
| <u>Number of cigarettes he/she usually smoke per day inside home:</u>                                                                                                         | <input type="radio"/>         | <input type="checkbox"/> | <input type="checkbox"/> <input type="checkbox"/> <input type="checkbox"/> <input type="checkbox"/> | <input type="checkbox"/> | <input type="checkbox"/>              | <input type="checkbox"/>      | <input type="checkbox"/> | <input type="checkbox"/> <input type="checkbox"/> <input type="checkbox"/> <input type="checkbox"/> | <input type="checkbox"/> | <input type="checkbox"/> <input type="checkbox"/> <input type="checkbox"/> |
| If unknown, please fill in "88".                                                                                                                                              | <input type="radio"/>         | <input type="checkbox"/> | <input type="checkbox"/> <input type="checkbox"/> <input type="checkbox"/> <input type="checkbox"/> | <input type="checkbox"/> | <input type="checkbox"/>              | <input type="checkbox"/>      | <input type="checkbox"/> | <input type="checkbox"/> <input type="checkbox"/> <input type="checkbox"/> <input type="checkbox"/> | <input type="checkbox"/> | <input type="checkbox"/> <input type="checkbox"/> <input type="checkbox"/> |
|                                                                                                                                                                               | <input type="radio"/>         | <input type="checkbox"/> | <input type="checkbox"/> <input type="checkbox"/> <input type="checkbox"/> <input type="checkbox"/> | <input type="checkbox"/> | <input type="checkbox"/>              | <input type="checkbox"/>      | <input type="checkbox"/> | <input type="checkbox"/> <input type="checkbox"/> <input type="checkbox"/> <input type="checkbox"/> | <input type="checkbox"/> | <input type="checkbox"/> <input type="checkbox"/> <input type="checkbox"/> |

|                                                                                                                                  |                                                                                                                                                                                                                                   |                       |                          |
|----------------------------------------------------------------------------------------------------------------------------------|-----------------------------------------------------------------------------------------------------------------------------------------------------------------------------------------------------------------------------------|-----------------------|--------------------------|
| A5.3.0 Is your house/apartment purchased/self-built/inherited/rented?                                                            | 1 purchased 2 self-built 3 inherited<br>4 welfare-oriented public housing<br>5 rented or subleased<br>6 others _____                                                                                                              | <input type="radio"/> | <input type="checkbox"/> |
| A5.3.1 Under whose name was your current house/apartment purchased/self-built/inherited?                                         | 1 self or spouse 2 child(ren)<br>3 grandchild(ren)<br>4 relative(s) 5 other                                                                                                                                                       | <input type="radio"/> | <input type="checkbox"/> |
| A5.3.2 Do you (and your spouse) have your own bedroom?                                                                           | 1 yes 2 no                                                                                                                                                                                                                        | <input type="radio"/> | <input type="checkbox"/> |
| <b>Characteristics of Current Residence</b> (PhenX code: 060100)                                                                 |                                                                                                                                                                                                                                   |                       |                          |
| A5.3.3 What type of dwelling is your home?                                                                                       | 1 Detached house<br>2 Duplex/Triplex<br>3 Row house<br>4 Low rise apartment (1-3 floors)<br>5 High rise apartment (>3 floors)<br>6 Mobile home / Trailer<br>7 other                                                               | <input type="radio"/> | <input type="checkbox"/> |
| A5.3.4 During the past 12 months, has there been water or dampness in your home from broken pipes, leaks, heavy rain, or floods? | 1 yes 2 no<br>8 don't know                                                                                                                                                                                                        | <input type="radio"/> | <input type="checkbox"/> |
| A5.3.5 Does your home frequently have a mildew odor or musty smell?                                                              | 1 yes 2 no<br>8 don't know                                                                                                                                                                                                        | <input type="radio"/> | <input type="checkbox"/> |
| A5.3.6 Which fuels are normally used for cooking in your home?                                                                   | 0 Never cooking<br>1 Gas: from underground pipes serving the neighborhood<br>2 Gas: bottled, tank, or LP<br>3 Electricity 4 Fuel oil, kerosene, etc<br>5 Coal or coke 6 Charcoal<br>7 Solar energy 8 Firewood or straw<br>9 other | <input type="radio"/> | <input type="checkbox"/> |
| A5.3.7 How is ventilation of the kitchen when cooking at home?                                                                   | 1 No ventilation<br>2 Kitchen ventilation 3 Fan<br>4 By opening window                                                                                                                                                            | <input type="radio"/> | <input type="checkbox"/> |
| <b>A5.4 Indoor air quality</b>                                                                                                   |                                                                                                                                                                                                                                   |                       |                          |
| A5.4.1 How often opening windows for ventilation in the last 12 months?                                                          | 1 Do not open windows<br>2 1-3 times per week 3 3-5 times per week<br>4 >5 times per week                                                                                                                                         |                       |                          |
| A5.4.1.1 Window open in Spring                                                                                                   |                                                                                                                                                                                                                                   | <input type="radio"/> | <input type="checkbox"/> |
| A5.4.1.2 Window open in Summer                                                                                                   |                                                                                                                                                                                                                                   | <input type="radio"/> | <input type="checkbox"/> |
| A5.4.1.3 Window open in Fall                                                                                                     |                                                                                                                                                                                                                                   | <input type="radio"/> | <input type="checkbox"/> |
| A5.4.1.4 Window open in Winter                                                                                                   |                                                                                                                                                                                                                                   | <input type="radio"/> | <input type="checkbox"/> |
| A5.4.2 How many meters is your home horizontal distance from the main traffic street?                                            | 1 <50 meters 2 50~100 meters<br>3 101~200 meters 4 201~300 meters<br>5 >300 meters                                                                                                                                                | <input type="radio"/> | <input type="checkbox"/> |
| A5.4.3 Does your home use air purifiers or activated carbon to improve indoor air quality?                                       | 1 No<br>2 Yes                                                                                                                                                                                                                     | <input type="radio"/> | <input type="checkbox"/> |

|                                                                                                                        |                                                                                                                                                                                                                   |                       |                                                                                                                                                       |
|------------------------------------------------------------------------------------------------------------------------|-------------------------------------------------------------------------------------------------------------------------------------------------------------------------------------------------------------------|-----------------------|-------------------------------------------------------------------------------------------------------------------------------------------------------|
| A5.5 Have you ever use following chemicals in house?                                                                   | 1 Rarely or never 2 Seldom<br>3 Sometimes 4 Often                                                                                                                                                                 |                       |                                                                                                                                                       |
| A5.5.1 Insecticide                                                                                                     |                                                                                                                                                                                                                   | <input type="radio"/> | <input type="checkbox"/>                                                                                                                              |
| A5.5.2 Repellents                                                                                                      |                                                                                                                                                                                                                   | <input type="radio"/> | <input type="checkbox"/>                                                                                                                              |
| A5.5.3 Anti-carries agent                                                                                              |                                                                                                                                                                                                                   | <input type="radio"/> | <input type="checkbox"/>                                                                                                                              |
| A5.5.4 Air freshener                                                                                                   |                                                                                                                                                                                                                   | <input type="radio"/> | <input type="checkbox"/>                                                                                                                              |
| A5.5.5 Air purifier                                                                                                    |                                                                                                                                                                                                                   | <input type="radio"/> | <input type="checkbox"/>                                                                                                                              |
| A5.5.6 Disinfectant                                                                                                    |                                                                                                                                                                                                                   | <input type="radio"/> | <input type="checkbox"/>                                                                                                                              |
| A5.5.7 Toilet cleaner                                                                                                  |                                                                                                                                                                                                                   | <input type="radio"/> | <input type="checkbox"/>                                                                                                                              |
| A5.5.8 Oil remover                                                                                                     |                                                                                                                                                                                                                   | <input type="radio"/> | <input type="checkbox"/>                                                                                                                              |
| <i>If living with family, skip to Part B; if living alone, skip to A5.8</i>                                            |                                                                                                                                                                                                                   |                       |                                                                                                                                                       |
| A5.6.0 What is the primary reason that you live in an institution (Elderly center, elderly home, welfare center, etc.) | 1 no child or child is unavailable for caregiving<br>2 don't want to bother children<br>3 no own house/apartment but want to separate with children<br>4 able to interact with other old persons<br>5 others_____ | <input type="radio"/> | <input type="checkbox"/>                                                                                                                              |
| A5.6.1 What is the average monthly cost for you living in an institution?                                              | _____ (Yuan) (if more than 10,000, please code 9998)                                                                                                                                                              | <input type="radio"/> | <input type="checkbox"/> <input type="checkbox"/> <input type="checkbox"/> <input type="checkbox"/>                                                   |
| A5.6.2 Who mainly pays the cost?                                                                                       | 1 self 2 spouse<br>3 children & their spouses<br>4 grandchildren & their spouses<br>5 state/collectives 6 others                                                                                                  | <input type="radio"/> | <input type="checkbox"/>                                                                                                                              |
| A5.7 If living in nursing home, since when? (skip to B1)                                                               | Year_____ month _____                                                                                                                                                                                             | <input type="radio"/> | <input type="checkbox"/> <input type="checkbox"/> <input type="checkbox"/> <input type="checkbox"/> <input type="checkbox"/> <input type="checkbox"/> |
| A5.8 What is the primary reason that you live alone?                                                                   | 1 No child or child is unavailable for caregiving<br>2 Don't want to bother children<br>3 Others_____                                                                                                             | <input type="radio"/> | <input type="checkbox"/>                                                                                                                              |
| A5.9 If living alone, since when?                                                                                      | Year_____ month _____                                                                                                                                                                                             | <input type="radio"/> | <input type="checkbox"/> <input type="checkbox"/> <input type="checkbox"/> <input type="checkbox"/> <input type="checkbox"/> <input type="checkbox"/> |

| <b>*B. LIFE EVALUATION AND PERSONALITY</b><br>(to be answered by interviewee <b>ONLY</b> ) |                                                                                                         |  | Code                     |
|--------------------------------------------------------------------------------------------|---------------------------------------------------------------------------------------------------------|--|--------------------------|
| <b>*B1. Life Satisfaction and Self-Rated Health</b>                                        |                                                                                                         |  |                          |
| * B1.1 How do you rate your life at present?                                               | 1 very good 2 good 3 so so 4 bad<br>5 very bad 8 not able to answer                                     |  | <input type="checkbox"/> |
| * B1.2 How do you rate your health at present?                                             | 1 very good 2 good 3 so so 4 bad<br>5 very bad 8 not able to answer                                     |  | <input type="checkbox"/> |
| * B1.2.1 How do you rate your health at present compared with one year ago?                | 1 much better 2 slightly better 3 almost the same<br>4 slightly worse 5 much worse 8 not able to answer |  | <input type="checkbox"/> |

| <b>*B2. Personality and Mood</b>                                                                                                                                               |                                                                       |  |                          |
|--------------------------------------------------------------------------------------------------------------------------------------------------------------------------------|-----------------------------------------------------------------------|--|--------------------------|
| * B2.1 Do you always look on the bright side of things?                                                                                                                        | 1 always 2 often 3 sometimes 4 seldom 5 never<br>8 not able to answer |  | <input type="checkbox"/> |
| * B2.2 Do you like to keep your belongings neat and clean?                                                                                                                     | 1 always 2 often 3 sometimes 4 seldom 5 never<br>8 not able to answer |  | <input type="checkbox"/> |
| * B2.3 Do you feel energized?                                                                                                                                                  | 1 always 2 often 3 sometimes 4 seldom 5 never<br>8 not able to answer |  | <input type="checkbox"/> |
| * B2.4 Have you been ashamed, regretful, or felt guilty about things you've done?                                                                                              | 1 always 2 often 3 sometimes 4 seldom 5 never<br>8 not able to answer |  | <input type="checkbox"/> |
| *B2.5 Are you angry at people or things you don't like around you?                                                                                                             | 1 always 2 often 3 sometimes 4 seldom 5 never<br>8 not able to answer |  | <input type="checkbox"/> |
| * B2.6 Can you make your own decisions concerning your personal affairs?                                                                                                       | 1 always 2 often 3 sometimes 4 seldom 5 never<br>8 not able to answer |  | <input type="checkbox"/> |
| *B2.7 Do you feel that people around you are not trustworthy?                                                                                                                  | 1 always 2 often 3 sometimes 4 seldom 5 never<br>8 not able to answer |  | <input type="checkbox"/> |
| * B2.8 Have you had a time in last 12 months lasting two weeks or more when you lost interest in most things like hobbies, work, or activities that usually give you pleasure? | 1 Yes 2 No<br>8 not able to answer                                    |  | <input type="checkbox"/> |
| <b>*B3 Depression (CESD) Scale</b>                                                                                                                                             |                                                                       |  |                          |
| *B3.1 Are you bothered by things that don't usually bother you?                                                                                                                | 1 always 2 often 3 sometimes 4 seldom 5 never<br>8 not able to answer |  | <input type="checkbox"/> |
| *B3.2 Do you have trouble focusing on what you were doing?                                                                                                                     | 1 always 2 often 3 sometimes 4 seldom 5 never<br>8 not able to answer |  | <input type="checkbox"/> |
| * B3.3 Do you feel sad, blue, or depressed?                                                                                                                                    | 1 always 2 often 3 sometimes 4 seldom 5 never<br>8 not able to answer |  | <input type="checkbox"/> |
| * B3.4 Do you feel the older you get, the more useless you are, and have trouble doing anything?                                                                               | 1 always 2 often 3 sometimes 4 seldom 5 never<br>8 not able to answer |  | <input type="checkbox"/> |
| *B3.5 Do you feel hopeful about the future?                                                                                                                                    | 1 always 2 often 3 sometimes 4 seldom 5 never<br>8 not able to answer |  | <input type="checkbox"/> |
| * B3.6 Do you often feel fearful or anxious?                                                                                                                                   | 1 always 2 often 3 sometimes 4 seldom 5 never<br>8 not able to answer |  | <input type="checkbox"/> |
| * B3.7 Are you as happy as when you were younger? ( <i>If you feel happier than when you were young, please fill in '1'</i> )                                                  | 1 always 2 often 3 sometimes 4 seldom 5 never<br>8 not able to answer |  | <input type="checkbox"/> |
| * B3.8 Do you often feel lonely and isolated?                                                                                                                                  | 1 always 2 often 3 sometimes 4 seldom 5 never<br>8 not able to answer |  | <input type="checkbox"/> |
| *B3.9 Do you feel you could not get "going"?                                                                                                                                   | 1 always 2 often 3 sometimes 4 seldom 5 never<br>8 not able to answer |  | <input type="checkbox"/> |
| B3.10-1 How about the quality of your sleep?                                                                                                                                   | 1 very good 2 good 3 so so 4 bad 5 very bad<br>8 not able to answer   |  | <input type="checkbox"/> |
| B3.10-2 How many hours do you sleep normally?                                                                                                                                  | _____ hours                                                           |  | <input type="text"/>     |

|                                                                                                                                           |                                                                                                                                                                                                                                                                                                                   |                          |
|-------------------------------------------------------------------------------------------------------------------------------------------|-------------------------------------------------------------------------------------------------------------------------------------------------------------------------------------------------------------------------------------------------------------------------------------------------------------------|--------------------------|
| <b>*B4 Anxiety Scale</b> (to be answered by interviewee <b>ONLY</b> )                                                                     |                                                                                                                                                                                                                                                                                                                   |                          |
| In the last two weeks, how often did you have following symptom?<br>0 never 1 for several days 2 more than half of days 3 almost everyday |                                                                                                                                                                                                                                                                                                                   |                          |
| B4.1 Feeling uneasy, worried and annoyed                                                                                                  |                                                                                                                                                                                                                                                                                                                   | <input type="checkbox"/> |
| B4.2 Cannot stop or cannot control worry                                                                                                  |                                                                                                                                                                                                                                                                                                                   | <input type="checkbox"/> |
| B4.3 Is worried too much about all kinds of things                                                                                        |                                                                                                                                                                                                                                                                                                                   | <input type="checkbox"/> |
| B4.4 Is very nervous and difficult to relax                                                                                               |                                                                                                                                                                                                                                                                                                                   | <input type="checkbox"/> |
| B4.5 Is very anxious, so cannot sit still                                                                                                 |                                                                                                                                                                                                                                                                                                                   | <input type="checkbox"/> |
| B4.6 Becomes easy to get annoyed or easily irritated                                                                                      |                                                                                                                                                                                                                                                                                                                   | <input type="checkbox"/> |
| B4.7 Feels like something terrible happens                                                                                                |                                                                                                                                                                                                                                                                                                                   | <input type="checkbox"/> |
| <b>(Questions B4.8 and B4.9 are for Interviewer ONLY)</b>                                                                                 |                                                                                                                                                                                                                                                                                                                   |                          |
| B4.8 Did respondents answer all the questions in the above anxiety section?                                                               | 1 yes 2 no 3 partly                                                                                                                                                                                                                                                                                               | <input type="checkbox"/> |
| B4.9 If cannot answer all questions or partially, please explain the main reason (select one only)                                        | 1 visual impairment but can hear<br>2 hearing impairment but can see<br>3 both visual and hearing impairment<br>4 paralysis<br>5 did not wish to participate<br>6 cannot understand questions due to dementia<br>7 cannot be interviewed due to illness<br>8 cannot understand questions<br>9 other reasons _____ | <input type="checkbox"/> |

|                                                                                      |                                        |                                                   |
|--------------------------------------------------------------------------------------|----------------------------------------|---------------------------------------------------|
| <b>C. MINI MENTAL STATE EXAMINATION (MMSE)</b>                                       |                                        | Code                                              |
| <b>*C1 ORIENTATION</b> (to be answered by interviewee <b>ONLY</b> )                  |                                        |                                                   |
| * C1.1 What time of day is it right now (morning, afternoon, evening)?               | 1 correct 0 wrong 8 not able to answer | <input type="checkbox"/>                          |
| * C1.2 What is the month (Western or Chinese calendar) right now?                    | 1 correct 0 wrong 8 not able to answer | <input type="checkbox"/>                          |
| * C1.3 What is the date (Chinese calendar day and month) of the mid-autumn festival? | 1 correct 0 wrong 8 not able to answer | <input type="checkbox"/>                          |
| * C1.4 What is the season right now, spring, summer, fall, winter?                   | 1 correct 0 wrong 8 not able to answer | <input type="checkbox"/>                          |
| * C1.5 What is the name of this district or town?                                    | 1 correct 0 wrong 8 not able to answer | <input type="checkbox"/>                          |
| * C1.6 Please name as many kinds of food as possible in 1 minute.                    | _____ (kinds of food)                  | <input type="checkbox"/> <input type="checkbox"/> |
| <b>*C2 REGISTRATION</b> (to be answered by interviewee <b>ONLY</b> )                 |                                        |                                                   |
| * C2.1 I am now going to test your memory. I will mention                            |                                        |                                                   |

|                                                                                                                                                                                                                                                                                                                                                                              |                                                                                                                                                                                                                                                                                                                                                   |                                                                                                                                                     |
|------------------------------------------------------------------------------------------------------------------------------------------------------------------------------------------------------------------------------------------------------------------------------------------------------------------------------------------------------------------------------|---------------------------------------------------------------------------------------------------------------------------------------------------------------------------------------------------------------------------------------------------------------------------------------------------------------------------------------------------|-----------------------------------------------------------------------------------------------------------------------------------------------------|
| <p>three objects.<br/>(Mention the following three objects without pausing:)</p> <p>table, apple, clothes</p> <p>Please repeat these three objects.<br/>(Evaluation based on first attempt only.)<br/>--- If all three questions are answered correct, please skip to C3.1</p> <p>table<br/>apple<br/>clothes</p>                                                            | <p>1 correct      0 wrong<br/>8 not able to answer</p> <p>_____<br/>_____<br/>_____</p>                                                                                                                                                                                                                                                           | <p><input type="checkbox"/><br/><input type="checkbox"/><br/><input type="checkbox"/></p>                                                           |
| <p>*C2.2 If answers are insufficient or incorrect on the first attempt, repeat the names of all objects until the interviewee is able to name all three of them (6 attempts at maximum). Write the number of attempts (e.g., '1', if all three objects are repeated correctly on first attempt). Write '7' if interviewee cannot repeat the names even after 6 attempts.</p> | <p>_____ attempts</p>                                                                                                                                                                                                                                                                                                                             | <p><input type="checkbox"/></p>                                                                                                                     |
| <p><b>*C3 ATTENTION AND CALCULATION (to be answered by interviewee ONLY)</b></p>                                                                                                                                                                                                                                                                                             |                                                                                                                                                                                                                                                                                                                                                   |                                                                                                                                                     |
| <p>* C3.1 I will ask you to spend 3 dollars from 20 dollars, then you must spend 3 dollars from the number you arrived at and continue to spend 3 dollars until you are asked to stop.</p>                                                                                                                                                                                   |                                                                                                                                                                                                                                                                                                                                                   |                                                                                                                                                     |
| <p>(Circle '1' each time the difference is 3 – even if a former answer was wrong. If the interviewee forgets the last number, the interviewer should repeat it, but then circle '0' even if the answer was correct. Maximum score = 5 correct answers.)</p>                                                                                                                  | <p>1<sup>st</sup>    1 correct    0 wrong    8 not able to answer<br/>2<sup>nd</sup>    1 correct    0 wrong    8 not able to answer<br/>3<sup>rd</sup>    1 correct    0 wrong    8 not able to answer<br/>4<sup>th</sup>    1 correct    0 wrong    8 not able to answer<br/>5<sup>th</sup>    1 correct    0 wrong    8 not able to answer</p> | <p><input type="checkbox"/><br/><input type="checkbox"/><br/><input type="checkbox"/><br/><input type="checkbox"/><br/><input type="checkbox"/></p> |
| <p>* C3.2 Ask the interviewee to draw the figure on B Card.<br/>(Circle '1' if all the sides and angles are correct and if the figure in the middle is a quadrangle. Otherwise, circle '0'.)</p>                                                                                                                                                                             | <p>1 correct      0 wrong<br/>8 can't use pen to draw the figure<br/>9 not able to do this (disabled)</p>                                                                                                                                                                                                                                         | <p><input type="checkbox"/></p>                                                                                                                     |
| <p><b>*C4 RECALL (to be answered by interviewee ONLY)</b></p>                                                                                                                                                                                                                                                                                                                |                                                                                                                                                                                                                                                                                                                                                   |                                                                                                                                                     |



|                                                                                                                                                                                                                                                                                                                                                                                                                                                                               |                                                                                                 |                                                                                                 |
|-------------------------------------------------------------------------------------------------------------------------------------------------------------------------------------------------------------------------------------------------------------------------------------------------------------------------------------------------------------------------------------------------------------------------------------------------------------------------------|-------------------------------------------------------------------------------------------------|-------------------------------------------------------------------------------------------------|
| <p>* C4.1 Please repeat the three words (in any order) that I asked you to repeat a little while ago.<br/>(Note the correct or the wrong answers as the scores.)</p> <p>table<br/>apple<br/>clothes</p>                                                                                                                                                                                                                                                                       | <p>1 correct      0 wrong      8 not able to do this</p> <p>_____</p> <p>_____</p> <p>_____</p> | <p><input type="checkbox"/></p> <p><input type="checkbox"/></p> <p><input type="checkbox"/></p> |
| <p>*C5 LANGUAGE (to be answered by interviewee <b>ONLY</b>)</p>                                                                                                                                                                                                                                                                                                                                                                                                               |                                                                                                 |                                                                                                 |
| <p>* C5.1 Give the interviewee a pen and then a watch and ask what these objects are called (1 point for each correct answer).</p> <p>pen<br/>watch</p>                                                                                                                                                                                                                                                                                                                       | <p>1 correct      0 wrong      8 not able to answer</p> <p>_____</p> <p>_____</p>               | <p><input type="checkbox"/></p> <p><input type="checkbox"/></p>                                 |
| <p>* C5.2 I will now ask you to repeat the following sentence:<br/><br/>‘What you plant, what you will get.’<br/>(Circle ‘1’ only if repeated correctly on the first attempt.)</p>                                                                                                                                                                                                                                                                                            | <p>1 correct      0 wrong      8 not able to answer</p>                                         | <p><input type="checkbox"/></p>                                                                 |
| <p>* C5.3 I will give you a piece of paper. You must take the paper using your right hand, fold it in the middle using both hands, and place the paper on the floor.<br/><br/>(Read the text aloud and hand a piece of paper to the interviewee. Give the paper directly to the interviewee. Do not repeat the instructions and do not offer any help. Note every movement as correct if it is made in the correct order.)</p> <p>right hand<br/>folding<br/>on the floor</p> | <p>1 correct      0 wrong      8 not able to do</p> <p>_____</p> <p>_____</p> <p>_____</p>      | <p><input type="checkbox"/></p> <p><input type="checkbox"/></p> <p><input type="checkbox"/></p> |
| <p align="center"><i>(Questions C5.4 and C5.5 are for Interviewer ONLY)</i></p>                                                                                                                                                                                                                                                                                                                                                                                               |                                                                                                 |                                                                                                 |
| <p>C5.4 Was the interviewee able to answer the questions in sections B and C?</p>                                                                                                                                                                                                                                                                                                                                                                                             | <p>1 yes --- Skip to C6    2 no    3 partly</p>                                                 | <p><input type="checkbox"/></p>                                                                 |

|                                                                      |                                                                                                                                                                                                                                                                                                                                                                                     |                          |
|----------------------------------------------------------------------|-------------------------------------------------------------------------------------------------------------------------------------------------------------------------------------------------------------------------------------------------------------------------------------------------------------------------------------------------------------------------------------|--------------------------|
| C5.5 If 'no' or 'partly', what is the main reason? (select one only) | 1 visually impaired, but can hear<br>2 hearing impaired, but can see<br>3 visually and hearing impaired<br>4 paralyzed<br>5 did not wish to participate<br>6 could not understand because of cognitive impairment<br>7 not able to participate at the moment because of some temporary illness such as a cold<br>8 could not understand question<br>9 other (please explain): _____ | <input type="checkbox"/> |
|----------------------------------------------------------------------|-------------------------------------------------------------------------------------------------------------------------------------------------------------------------------------------------------------------------------------------------------------------------------------------------------------------------------------------------------------------------------------|--------------------------|

| <b>* C6. Community Screening Instrument for Dementia (CSI-D; cognition)</b>                                                                                                                         |                                                                                      |                          |
|-----------------------------------------------------------------------------------------------------------------------------------------------------------------------------------------------------|--------------------------------------------------------------------------------------|--------------------------|
| *C6.1 What do people usually use to cut vegetables?                                                                                                                                                 | 1. kitchen knife (correct)<br>2. not correct<br>8. don't know<br>9. refuse to answer | <input type="checkbox"/> |
| *C6.2 Do apples grow on the tree or in the soil?                                                                                                                                                    | 1. on the tree (correct)<br>2. not correct<br>8. don't know<br>9. refuse to answer   | <input type="checkbox"/> |
| *C6.3 Who is the President of the P.R.C right now?                                                                                                                                                  | 1. Xi Jinping (correct)<br>2. not correct<br>8. don't know<br>9. refuse to answer    | <input type="checkbox"/> |
| *C6.4 Interviewer points to his or her elbow and says "What do we call this?"                                                                                                                       | 1. elbow (correct)<br>2. incorrect<br>8. unable to answer<br>9. refuse to answer     | <input type="checkbox"/> |
| *C6.5 What do you do with a hammer? (Acceptable Answer is: To drive a nail into something, or alike)                                                                                                | 1. correct<br>2. incorrect<br>8. unable to answer<br>9. refuse to answer             | <input type="checkbox"/> |
| *C6.6 Where is the local market/store?                                                                                                                                                              | 1. correct<br>2. incorrect<br>8. unable to answer<br>9. refuse to answer             | <input type="checkbox"/> |
| *C6.7 Is it now morning, afternoon or evening? (Note: Interviewer determines whether the respondent's answer is correct or not according to the present time when the interview is being conducted) | 1. correct<br>2. incorrect<br>8. unable to answer<br>9. refuse to answer             | <input type="checkbox"/> |
| *C6.8 Please point first to the window and then to the door.                                                                                                                                        | 1. correct<br>2. incorrect<br>8. unable to answer<br>9. refuse to answer             | <input type="checkbox"/> |

|                      |      |
|----------------------|------|
| <b>D. LIFE STYLE</b> | Code |
|----------------------|------|

|                                                                                                                                                                               |                                                                         |                                                                                                            |                          |                          |                          |                                                   |
|-------------------------------------------------------------------------------------------------------------------------------------------------------------------------------|-------------------------------------------------------------------------|------------------------------------------------------------------------------------------------------------|--------------------------|--------------------------|--------------------------|---------------------------------------------------|
| D1                                                                                                                                                                            | Please tell us the staple food you eat.                                 | 1 rice<br>2 corn (maize)<br>3 wheat (noodles, bread, etc.)<br>4 half rice and half wheat<br>5 other: _____ |                          |                          |                          | <input type="checkbox"/>                          |
| D2                                                                                                                                                                            | How much of the above food do you normally eat per day?                 | _____ liang                                                                                                |                          |                          |                          | <input type="checkbox"/> <input type="checkbox"/> |
| D3.1                                                                                                                                                                          | Do you eat fresh fruit?                                                 | 1 everyday or almost everyday<br>2 quite often<br>3 occasionally<br>4 rarely or never                      |                          |                          |                          | <input type="checkbox"/>                          |
| D3.2                                                                                                                                                                          | Do you eat fresh vegetables?                                            | 1 everyday or almost everyday<br>2 quite often<br>3 occasionally<br>4 rarely or never                      |                          |                          |                          | <input type="checkbox"/>                          |
| D3.3                                                                                                                                                                          | What kind of grease do you mainly use for cooking?                      | 1 vegetable grease<br>2 gingili grease<br>3 lard<br>4 other animal's fat                                   |                          |                          |                          | <input type="checkbox"/>                          |
| D3.4                                                                                                                                                                          | what kind of flavor do you mainly have?                                 | 1 Insipidity    2 Salty    3 Sweet<br>4 Hot            5 Crude<br>6 Do not have all the above tastes       |                          |                          |                          | <input type="checkbox"/>                          |
| D4                                                                                                                                                                            | Please tell me what other kinds of food you normally eat and how often. | around age 60                                                                                              | at present               |                          | around age 60            | at present                                        |
| 1 almost everyday<br>2 not every day, but at least once per week<br>3 not every week, but at least once per month<br>4 not every month, but occasionally<br>5 rarely or never | meat                                                                    |                                                                                                            |                          | <input type="checkbox"/> | <input type="checkbox"/> | <input type="checkbox"/>                          |
|                                                                                                                                                                               | fish                                                                    |                                                                                                            |                          | <input type="checkbox"/> | <input type="checkbox"/> | <input type="checkbox"/>                          |
|                                                                                                                                                                               | eggs                                                                    |                                                                                                            |                          | <input type="checkbox"/> | <input type="checkbox"/> | <input type="checkbox"/>                          |
|                                                                                                                                                                               | food made from beans (tofu, etc.)                                       |                                                                                                            |                          | <input type="checkbox"/> | <input type="checkbox"/> | <input type="checkbox"/>                          |
|                                                                                                                                                                               | salt-preserved vegetables                                               |                                                                                                            |                          | <input type="checkbox"/> | <input type="checkbox"/> | <input type="checkbox"/>                          |
|                                                                                                                                                                               | sugar                                                                   |                                                                                                            |                          | <input type="checkbox"/> | <input type="checkbox"/> | <input type="checkbox"/>                          |
|                                                                                                                                                                               | tea                                                                     |                                                                                                            |                          | <input type="checkbox"/> | <input type="checkbox"/> | <input type="checkbox"/>                          |
|                                                                                                                                                                               | garlic                                                                  |                                                                                                            |                          | <input type="checkbox"/> | <input type="checkbox"/> | <input type="checkbox"/>                          |
|                                                                                                                                                                               | Milk products                                                           |                                                                                                            |                          | <input type="checkbox"/> | <input type="checkbox"/> | <input type="checkbox"/>                          |
|                                                                                                                                                                               | Nut (peanut, walnut, etc)                                               |                                                                                                            |                          | <input type="checkbox"/> | <input type="checkbox"/> | <input type="checkbox"/>                          |
| Mushroom or algae                                                                                                                                                             |                                                                         |                                                                                                            | <input type="checkbox"/> | <input type="checkbox"/> | <input type="checkbox"/> |                                                   |

|                                                                          |                                                                                                                                                                                       |                                                                                                             |                                    |                       |                          |                                                                            |
|--------------------------------------------------------------------------|---------------------------------------------------------------------------------------------------------------------------------------------------------------------------------------|-------------------------------------------------------------------------------------------------------------|------------------------------------|-----------------------|--------------------------|----------------------------------------------------------------------------|
|                                                                          | Vitamins (A/C/E,) products                                                                                                                                                            |                                                                                                             |                                    | <input type="radio"/> | <input type="checkbox"/> | <input type="checkbox"/>                                                   |
|                                                                          | Medicinal plant                                                                                                                                                                       |                                                                                                             |                                    | <input type="radio"/> | <input type="checkbox"/> | <input type="checkbox"/>                                                   |
|                                                                          |                                                                                                                                                                                       | around age 60                                                                                               | at present                         |                       | around age 60            | at present                                                                 |
| D4.a                                                                     | What type of tea did you mainly drink at present?                                                                                                                                     |                                                                                                             |                                    |                       |                          |                                                                            |
| D4.b                                                                     | What type of tea did you mainly drink around age 60?                                                                                                                                  |                                                                                                             |                                    |                       |                          |                                                                            |
|                                                                          | 1. Green tea; 2. Red tea (black tea);<br>3. Oolong tea; 4. White tea;<br>5. Yellow tea; 6. Dark tea (Pu-erh tea);<br>7. Compressed tea; 8. Scented tea;<br>9. Others, please specify: |                                                                                                             |                                    |                       |                          |                                                                            |
| D5                                                                       | What kind of water do you usually drink?                                                                                                                                              | 1 boiled water                                                                                              | 2 un-boiled water                  | <input type="radio"/> |                          | <input type="checkbox"/>                                                   |
| D6                                                                       | Such water is (was):                                                                                                                                                                  | childhood                                                                                                   | around age 60                      | at present            | <input type="radio"/>    | childhood age 60 present                                                   |
|                                                                          | 1 water from a well<br>2 water from a river or lake<br>3 water from a spring<br>4 water from a pond or pool<br>5 tap water                                                            |                                                                                                             |                                    |                       | <input type="radio"/>    | <input type="checkbox"/> <input type="checkbox"/> <input type="checkbox"/> |
| D7.1                                                                     | Do you smoke at the present time?                                                                                                                                                     | 1 yes                                                                                                       | 2 no. <i>If "No", skip to D7.8</i> | <input type="radio"/> |                          | <input type="checkbox"/>                                                   |
| D7.2                                                                     | Did you smoke in the past?                                                                                                                                                            | 1 yes                                                                                                       | 2 no                               | <input type="radio"/> |                          | <input type="checkbox"/>                                                   |
| <i>If the answers of both D7.1 and D7.2 is 'No', please skip to D8.1</i> |                                                                                                                                                                                       |                                                                                                             |                                    |                       |                          |                                                                            |
| D7.3                                                                     | How old were you when you began to smoke?                                                                                                                                             | age _____                                                                                                   |                                    | <input type="radio"/> |                          | <input type="checkbox"/> <input type="checkbox"/> <input type="checkbox"/> |
| D7.4                                                                     | How old were you when you stopped smoking if you don't smoke at present?                                                                                                              | age _____<br><i>If still smoking now, please code 999; If don't remember when stopped, please code 888.</i> |                                    | <input type="radio"/> |                          | <input type="checkbox"/> <input type="checkbox"/> <input type="checkbox"/> |
| D7.5                                                                     | If you smoke at the present, how many times per day on average do you smoke?                                                                                                          | times _____                                                                                                 |                                    | <input type="radio"/> |                          | <input type="checkbox"/> <input type="checkbox"/>                          |
| <b>Tobacco - Nicotine Dependence (PhenX code: 031001)</b>                |                                                                                                                                                                                       |                                                                                                             |                                    |                       |                          |                                                                            |
| D7.6                                                                     | How soon after you wake up do you smoke your first cigarette?                                                                                                                         | 1 Within 5 minutes<br>2 6-30 minutes<br>3 31-60 minutes<br>4 After 60 minutes                               |                                    | <input type="radio"/> |                          | <input type="checkbox"/>                                                   |
| D8.1                                                                     | Do you drink alcohol at the present time?                                                                                                                                             | 1 yes                                                                                                       | 2 no. <i>If "no", skip to 8.7</i>  | <input type="radio"/> |                          | <input type="checkbox"/>                                                   |
| D8.2                                                                     | Did you drink alcohol in the past?                                                                                                                                                    | 1 yes                                                                                                       | 2 no                               | <input type="radio"/> |                          | <input type="checkbox"/>                                                   |

| <i>If the answers of both D8.1 and D8.2 is 'no', please skip to D9.1</i>                                            |                                                                                                                                                              |                       |                                                                            |
|---------------------------------------------------------------------------------------------------------------------|--------------------------------------------------------------------------------------------------------------------------------------------------------------|-----------------------|----------------------------------------------------------------------------|
| D8.3 How old were you when you began to drink alcohol?                                                              | age _____                                                                                                                                                    | <input type="radio"/> | <input type="checkbox"/> <input type="checkbox"/> <input type="checkbox"/> |
| D8.4 How old were you when stopped drinking alcohol if you don't drink alcohol at present?                          | age _____<br><i>If still smoking now, please code 999; If don't remember when stopped, please code 888.</i>                                                  | <input type="radio"/> | <input type="checkbox"/> <input type="checkbox"/> <input type="checkbox"/> |
| D8.5 If you drink alcohol at the present time, what kind of alcohol do you drink?                                   | 1 very strong liquor ( $\geq 38\%$ )<br>2 not very strong liquor ( $< 38\%$ )<br>3 wine 4 rice wine 5 beer 6 others                                          | <input type="radio"/> | <input type="checkbox"/>                                                   |
| D8.6 If you drink alcohol at the present time, how much alcohol per day on average do you drink?                    | _____ liang                                                                                                                                                  | <input type="radio"/> | <input type="checkbox"/> <input type="checkbox"/>                          |
| <b>Alcohol - Lifetime Abuse and Dependence</b> (PhenX code#: 030501)                                                |                                                                                                                                                              |                       |                                                                            |
| D8.7 When you stop, cut down, or go without drinking, do you feel anxious for most of the day for 2 days or longer? | 1 yes 2 no 9 not applicable                                                                                                                                  | <input type="radio"/> | <input type="checkbox"/>                                                   |
| D9.1 Do you do exercises regularly at present?                                                                      | 1 yes 2 no                                                                                                                                                   | <input type="radio"/> | <input type="checkbox"/>                                                   |
| D9.2 Did you do exercises regularly in the past?                                                                    | 1 yes 2 no                                                                                                                                                   | <input type="radio"/> | <input type="checkbox"/>                                                   |
| <i>If the answers of D9.1 and D9.2 are both 'no', please skip to D10.1</i>                                          |                                                                                                                                                              |                       |                                                                            |
| D9.3 How old were you when you began to do exercises?                                                               | age _____                                                                                                                                                    | <input type="radio"/> | <input type="checkbox"/> <input type="checkbox"/> <input type="checkbox"/> |
| D9.4 How old were you when you stopped doing exercises if you don't do exercises at present?                        | age _____<br><i>If still doing exercise now, please code 999; If don't remember when stopped, Please code 888.</i>                                           | <input type="radio"/> | <input type="checkbox"/> <input type="checkbox"/> <input type="checkbox"/> |
| D10.1 Have you done physical labor regularly?                                                                       | 1 yes 2 no---skip to D11                                                                                                                                     | <input type="radio"/> | <input type="checkbox"/> <input type="checkbox"/> <input type="checkbox"/> |
| D10.2 If yes, from which age                                                                                        | from age _____                                                                                                                                               | <input type="radio"/> | <input type="checkbox"/> <input type="checkbox"/> <input type="checkbox"/> |
| D10.3 to which age?                                                                                                 | to age _____                                                                                                                                                 | <input type="radio"/> | <input type="checkbox"/> <input type="checkbox"/> <input type="checkbox"/> |
| D11 Do you now perform the following activities regularly? (please choose one from frequency on the right)          | 1 almost everyday<br>2 not every day, but at least once a week<br>3 not every week, but at least once a month<br>4 not every month, but sometimes<br>5 never |                       |                                                                            |

|                                                                                 |                                                             |   |   |   |   |                       |                                                   |
|---------------------------------------------------------------------------------|-------------------------------------------------------------|---|---|---|---|-----------------------|---------------------------------------------------|
| D11.1 Housework (cooking, taking care of kids)                                  | 1                                                           | 2 | 3 | 4 | 5 | <input type="radio"/> | <input type="checkbox"/>                          |
| D11.2 Outdoor activities                                                        |                                                             |   |   |   |   | <input type="radio"/> |                                                   |
| D11.2a Tai Ji                                                                   | 1                                                           | 2 | 3 | 4 | 5 | <input type="radio"/> | <input type="checkbox"/>                          |
| D11.2b Square dance                                                             | 1                                                           | 2 | 3 | 4 | 5 | <input type="radio"/> | <input type="checkbox"/>                          |
| D11.2c Visit and interact with friends                                          | 1                                                           | 2 | 3 | 4 | 5 | <input type="radio"/> | <input type="checkbox"/>                          |
| D11.2d Other outdoor activity                                                   | 1                                                           | 2 | 3 | 4 | 5 | <input type="radio"/> | <input type="checkbox"/>                          |
| D11.3 Garden work                                                               | 1                                                           | 2 | 3 | 4 | 5 | <input type="radio"/> | <input type="checkbox"/>                          |
| D11.4 Read newspapers/books                                                     | 1                                                           | 2 | 3 | 4 | 5 | <input type="radio"/> | <input type="checkbox"/>                          |
| D11.5 Raise domestic animals                                                    | 1                                                           | 2 | 3 | 4 | 5 | <input type="radio"/> | <input type="checkbox"/>                          |
| D11.6 Play cards and/or mah-jong                                                | 1                                                           | 2 | 3 | 4 | 5 | <input type="radio"/> | <input type="checkbox"/>                          |
| D11.7 Watch TV and/or listen to radio                                           | 1                                                           | 2 | 3 | 4 | 5 | <input type="radio"/> | <input type="checkbox"/>                          |
| D11.8 Social activities (organized)                                             | 1                                                           | 2 | 3 | 4 | 5 | <input type="radio"/> | <input type="checkbox"/>                          |
| D12 How many tours beyond home city/county have you made in the past two years? | _____ times (if you have not made the tour, please code 00) |   |   |   |   | <input type="radio"/> | <input type="checkbox"/> <input type="checkbox"/> |

| E. ACTIVITIES OF DAILY LIVING (ADL) AND INSTRUMENTAL ACTIVITIES OF DAILY LIVING (IADL)                                                                                          |                                                                                                                                                                                                                                                                                           | Code                                                                                                |
|---------------------------------------------------------------------------------------------------------------------------------------------------------------------------------|-------------------------------------------------------------------------------------------------------------------------------------------------------------------------------------------------------------------------------------------------------------------------------------------|-----------------------------------------------------------------------------------------------------|
| For each area of functioning listed below, check the description that applies. (The word 'assistance' means supervision, direction, or personal assistance.)                    |                                                                                                                                                                                                                                                                                           |                                                                                                     |
| E0. For at least the last 6 months have you been limited in activities people usually do, because of a health problem? (If limited specify whether strongly limited or limited) | 1. Yes, strongly limited<br>2. Yes, limited<br>3. Not limited                                                                                                                                                                                                                             | <input type="checkbox"/>                                                                            |
| E1 <b>Bathing</b> – either sponge bath, tub bath, shower or washing the body                                                                                                    | 1 receives no assistance (gets in and out of tub alone if tub is usual means of bathing)--- <i>skip to E2</i><br>2 receives assistance in bathing only for part of the body (such as back or a leg)<br>3 receives assistance in bathing more than one part of the body (or doesn't bathe) | <input type="checkbox"/>                                                                            |
| E1.0 If receiving assistance, for how long?                                                                                                                                     | _____ days                                                                                                                                                                                                                                                                                | <input type="checkbox"/> <input type="checkbox"/> <input type="checkbox"/> <input type="checkbox"/> |

|                                                                                                                                                       |                                                                                                                                                                                                                                                                                                                                                                                                                                                      |                       |                                                                                                     |
|-------------------------------------------------------------------------------------------------------------------------------------------------------|------------------------------------------------------------------------------------------------------------------------------------------------------------------------------------------------------------------------------------------------------------------------------------------------------------------------------------------------------------------------------------------------------------------------------------------------------|-----------------------|-----------------------------------------------------------------------------------------------------|
| <p>E2 <b>Dressing</b> – gets clothes from closets and drawers – including underwear, outer garments and fasteners (including suspenders, if worn)</p> | <p>1 gets clothes and gets completely dressed without assistance--- <i>skip to E3</i><br/> 2 gets clothes and gets dressed without assistance except for tying shoes<br/> 3 receives assistance in getting clothes or in getting dressed, or stays partly or completely undressed</p>                                                                                                                                                                | <input type="radio"/> | <input type="checkbox"/>                                                                            |
| <p>E2.0 If receiving assistance, for how long?</p>                                                                                                    | <p>_____ days</p>                                                                                                                                                                                                                                                                                                                                                                                                                                    | <input type="radio"/> | <input type="checkbox"/> <input type="checkbox"/> <input type="checkbox"/> <input type="checkbox"/> |
| <p>E3 <b>Toilet</b> – going to the toilet; cleaning oneself afterwards</p>                                                                            | <p>1 goes to the toilet, cleans self, and arranges clothes without assistance (may use object for support such as cane, walker, or wheelchair)--- <i>skip to E4</i><br/> 2 can partly manage on his/her own, and receives assistance in going to the toilet or in cleaning self or in arranging clothes afterwards or in use of night bedpan or commode<br/> 3 bedridden and needs complete assistance in use of night bedpan or commode in bed.</p> | <input type="radio"/> | <input type="checkbox"/>                                                                            |
| <p>E3.0 If receiving assistance, for how long?</p>                                                                                                    | <p>_____ days</p>                                                                                                                                                                                                                                                                                                                                                                                                                                    | <input type="radio"/> | <input type="checkbox"/> <input type="checkbox"/> <input type="checkbox"/> <input type="checkbox"/> |
| <p>E4 <b>Indoor Transfer</b></p>                                                                                                                      | <p>1 gets in and out of bed as well as in and out of a chair without assistance (may use object for support such as cane or walker)--- <i>skip to E5</i><br/> 2 gets in and out of bed or chair with assistance<br/> 3 bedridden</p>                                                                                                                                                                                                                 | <input type="radio"/> | <input type="checkbox"/>                                                                            |
| <p>E4.0 If receiving assistance, for how long?</p>                                                                                                    | <p>_____ days</p>                                                                                                                                                                                                                                                                                                                                                                                                                                    | <input type="radio"/> | <input type="checkbox"/> <input type="checkbox"/> <input type="checkbox"/> <input type="checkbox"/> |
| <p>E5 <b>Continance</b></p>                                                                                                                           | <p>1 has complete control of urination and bowel movement without assistance--- <i>skip to E6</i><br/> 2 has occasional ‘accidents’<br/> 3 supervision helps keep urine or bowel control; catheter is used or elder is incontinent</p>                                                                                                                                                                                                               | <input type="radio"/> | <input type="checkbox"/>                                                                            |
| <p>E5.0 If has occasional ‘accidents’ or needs supervision, for how long?</p>                                                                         | <p>_____ days</p>                                                                                                                                                                                                                                                                                                                                                                                                                                    | <input type="radio"/> | <input type="checkbox"/> <input type="checkbox"/> <input type="checkbox"/> <input type="checkbox"/> |

|                                                                                                                                                |                                                                                                                                                                                                                                                    |                       |                                                                                                                              |
|------------------------------------------------------------------------------------------------------------------------------------------------|----------------------------------------------------------------------------------------------------------------------------------------------------------------------------------------------------------------------------------------------------|-----------------------|------------------------------------------------------------------------------------------------------------------------------|
| E6 <b>Eating</b>                                                                                                                               | 1 feeds self without assistance--- <i>skip to E6.1</i><br>2 feeds self, with some help<br>3 receives assistance in feeding or is fed partly or completely intravenously                                                                            | <input type="radio"/> | <input type="checkbox"/>                                                                                                     |
| E6.0 If receiving assistance, for how long?                                                                                                    | _____ days                                                                                                                                                                                                                                         | <input type="radio"/> | <input type="checkbox"/> <input type="checkbox"/> <input type="checkbox"/> <input type="checkbox"/>                          |
| <b><i>If the respondent chooses all 1 for E1 to E6, skip to E6.6</i></b>                                                                       |                                                                                                                                                                                                                                                    |                       |                                                                                                                              |
| E6.1 Who is the primary caregiver when you need assistance in above bathing, dressing, toileting, indoor transferring, continence, and eating? | 1 spouse<br>2 son<br>3 daughter-in-law<br>4 daughter<br>5 son-in-law<br>6 unmarried son and daughter<br>7 grandchild(ren)<br>8 relative(s)<br>9 friends and neighbors<br>10 social services<br>11 housekeeper<br>12 nobody ( <i>skip to E6.6</i> ) | <input type="radio"/> | <input type="checkbox"/> <input type="checkbox"/>                                                                            |
| E6.2 What is your primary caregiver's attitude when she/he takes care of you?                                                                  | 1 willing to do<br>2 impatience<br>3 need respite care<br>4 unwilling to do<br>5 don't know                                                                                                                                                        | <input type="radio"/> | <input type="checkbox"/>                                                                                                     |
| E6.3 How much is the total direct cost last week paid for these caregiving?                                                                    | _____ Yuan ( <i>if more than 100,000, please code 99998</i> )                                                                                                                                                                                      | <input type="radio"/> | <input type="checkbox"/> <input type="checkbox"/> <input type="checkbox"/> <input type="checkbox"/> <input type="checkbox"/> |
| E6.4 Who mainly pay the above cost?                                                                                                            | 1 self 2 spouse<br>3 children & their spouses<br>4 grandchildren & their spouses<br>5 state/collective 6 others                                                                                                                                    | <input type="radio"/> | <input type="checkbox"/>                                                                                                     |
| E6.5 Do you think the helps that you received in above six tasks could meet your needs?                                                        | 1 fully meet<br>2 so so<br>3 unmeet                                                                                                                                                                                                                |                       |                                                                                                                              |
| E6.6 How many persons among your children, grandchildren and their spouses helped you in above six tasks last week?                            | _____ persons ( <i>If nobody, fill 0 and skip to E7</i> )                                                                                                                                                                                          | <input type="radio"/> | <input type="checkbox"/>                                                                                                     |
| E6.7 How many hours in total did your children, grandchildren and their spouses help you last week?                                            | _____ hours                                                                                                                                                                                                                                        | <input type="radio"/> | <input type="checkbox"/>                                                                                                     |
| E7 Can you visit your neighbors by yourself?                                                                                                   | 1 yes, independently<br>2 yes, but need some help<br>3 no, can't                                                                                                                                                                                   | <input type="radio"/> | <input type="checkbox"/>                                                                                                     |
| E8 Can you go shopping by yourself?                                                                                                            | 1 yes, independently<br>2 yes, but need some help<br>3 no, can't                                                                                                                                                                                   | <input type="radio"/> | <input type="checkbox"/>                                                                                                     |



|                                                                      |                                                                  |                       |                          |
|----------------------------------------------------------------------|------------------------------------------------------------------|-----------------------|--------------------------|
| E9 Can you cook a meal by yourself whenever necessary?               | 1 yes, independently<br>2 yes, but need some help<br>3 no, can't | <input type="radio"/> | <input type="checkbox"/> |
| E10 Can you wash clothing by yourself whenever necessary?            | 1 yes, independently<br>2 yes, but need some help<br>3 no, can't | <input type="radio"/> | <input type="checkbox"/> |
| E11 Can you walk continuously for 1 kilometer at a time by yourself? | 1 yes, independently<br>2 yes, but need some help<br>3 no, can't | <input type="radio"/> | <input type="checkbox"/> |
| E12 Can you lift a weight of 5kg, such as a heavy bag of groceries?  | 1 yes, independently<br>2 yes, but need some help<br>3 no, can't | <input type="radio"/> | <input type="checkbox"/> |
| E13 Can you continuously crouch and stand up three times?            | 1 yes, independently<br>2 yes, but need some help<br>3 no, can't | <input type="radio"/> | <input type="checkbox"/> |
| E14 Can you take public transportation by yourself?                  | 1 yes, independently<br>2 yes, but need some help<br>3 no, can't | <input type="radio"/> | <input type="checkbox"/> |

| F. PERSONAL BACKGROUND                                                |                                                                                                                                                                                                                                                                                                                               |                       | Code                                                                                                                         |
|-----------------------------------------------------------------------|-------------------------------------------------------------------------------------------------------------------------------------------------------------------------------------------------------------------------------------------------------------------------------------------------------------------------------|-----------------------|------------------------------------------------------------------------------------------------------------------------------|
| F1 How many years did you attend school?                              | _____ (if never, please code 00)                                                                                                                                                                                                                                                                                              | <input type="radio"/> | <input type="checkbox"/> <input type="checkbox"/>                                                                            |
| F2 What was your primary occupation before age 60?                    | 0 professional or technical personnel/doctors/teachers<br>1 governmental, institutional or managerial personnel<br>2 staff/service worker/industrial worker<br>3 self-employer<br>4 agriculture, forestry, animal husbandry, fishery<br>5 housewife<br>6 military personnel<br>7 unemployed<br>8 other, please specify: _____ | <input type="radio"/> | <input type="checkbox"/>                                                                                                     |
| F2.1 Do you have a pension for retirement?                            | 1 retired (worker) 2 retired (cadre)<br>3 no ---skip to F3.1                                                                                                                                                                                                                                                                  | <input type="radio"/> | <input type="checkbox"/>                                                                                                     |
| F2.1.1 Are you retired now?                                           | 1 retired (worker) 2 retired (cadre)<br>3 no ---skip to F3.1                                                                                                                                                                                                                                                                  | <input type="radio"/> | <input type="checkbox"/>                                                                                                     |
| F2.2.0 In which year did you retire if you have already retired?      | _____ year                                                                                                                                                                                                                                                                                                                    | <input type="radio"/> | <input type="checkbox"/> <input type="checkbox"/> <input type="checkbox"/> <input type="checkbox"/>                          |
| F2. 2.2.1 What is your monthly pension?                               | _____ Yuan                                                                                                                                                                                                                                                                                                                    | <input type="radio"/> | <input type="checkbox"/> <input type="checkbox"/> <input type="checkbox"/> <input type="checkbox"/> <input type="checkbox"/> |
| F2.3 If you have retired, are you still engaged in paid jobs now?     | 1 yes 2 no                                                                                                                                                                                                                                                                                                                    | <input type="radio"/> | <input type="checkbox"/>                                                                                                     |
| <b><i>If having a pension for retirement, please skip to F3.1</i></b> |                                                                                                                                                                                                                                                                                                                               |                       |                                                                                                                              |

|                                                                                                                                                          |                                                                                                                                                                                   |                       |                                                                                                                                                                                                                                                                                                                  |
|----------------------------------------------------------------------------------------------------------------------------------------------------------|-----------------------------------------------------------------------------------------------------------------------------------------------------------------------------------|-----------------------|------------------------------------------------------------------------------------------------------------------------------------------------------------------------------------------------------------------------------------------------------------------------------------------------------------------|
| F2.4 Do you participated in public old age insurance?                                                                                                    | 1 yes 2 no---skip to F2.7                                                                                                                                                         | <input type="radio"/> | <input type="checkbox"/>                                                                                                                                                                                                                                                                                         |
| F2.5 What is the annual payment if participate in public old age insurance program?<br>--paid by individual:<br>--subsidy from collective or government: | ____ Yuan<br>____ Yuan                                                                                                                                                            | <input type="radio"/> | <input type="checkbox"/> <input type="checkbox"/> <input type="checkbox"/> <input type="checkbox"/> <input type="checkbox"/><br><input type="checkbox"/> <input type="checkbox"/> <input type="checkbox"/> <input type="checkbox"/> <input type="checkbox"/>                                                     |
| F2.5.b When did you initially participate in public old age insurance program?                                                                           | ____ Year<br>____ Month                                                                                                                                                           | <input type="radio"/> | <input type="checkbox"/> <input type="checkbox"/> <input type="checkbox"/> <input type="checkbox"/><br><input type="checkbox"/> <input type="checkbox"/>                                                                                                                                                         |
| F2.6 What is your monthly pension from old age insurance at present?                                                                                     | ____ Yuan---skip to F3.1                                                                                                                                                          | <input type="radio"/> | <input type="checkbox"/> <input type="checkbox"/> <input type="checkbox"/> <input type="checkbox"/> <input type="checkbox"/>                                                                                                                                                                                     |
| F2.7 What's the reason that you did not participate in public old age insurance program?                                                                 | 1 not worth<br>2 not necessary<br>3 cannot afford to the payment<br>8 don't know                                                                                                  | <input type="radio"/> | <input type="checkbox"/>                                                                                                                                                                                                                                                                                         |
| F3.1 What is your primary means of financial support?                                                                                                    | 1 retirement wages<br>2 spouse 3 child(ren)<br>4 grandchild(ren) 5 relative(s)<br>6 local government or community<br>7 work<br>8 other, please specify: _____                     | <input type="radio"/> | <input type="checkbox"/>                                                                                                                                                                                                                                                                                         |
| F3.2 What is your other means of financial support? (multiple choices but limit to 5 choices)                                                            | 1 retirement wages<br>2 spouse 3 child(ren)<br>4 grandchild(ren) 5 relative(s)<br>6 local government or community<br>7 work<br>8 other, please specify: _____<br>9 no other means | <input type="radio"/> | <input type="checkbox"/> <input type="checkbox"/> <input type="checkbox"/> <input type="checkbox"/> <input type="checkbox"/>                                                                                                                                                                                     |
| F3.3 Does all of your financial support sufficiently pay your daily costs?                                                                               | 1 yes 2 no                                                                                                                                                                        | <input type="radio"/> | <input type="checkbox"/>                                                                                                                                                                                                                                                                                         |
| F3.4 How do you rate your economic status compared with others in your local area?                                                                       | 1 very rich 2 rich 3 so so<br>4 poor 5 very poor 8 didn't answer                                                                                                                  | <input type="radio"/> | <input type="checkbox"/>                                                                                                                                                                                                                                                                                         |
| F3.5 What was the income per capita of your household last year?                                                                                         | ____ Yuan (if more than 100,000, please code 99998)                                                                                                                               | <input type="radio"/> | <input type="checkbox"/> <input type="checkbox"/> <input type="checkbox"/> <input type="checkbox"/> <input type="checkbox"/>                                                                                                                                                                                     |
| F4.1 Current marital status:                                                                                                                             | 1 married and living with spouse<br>2 married but not living with spouse<br>3 divorced<br>4 widowed<br>5 never married---skip to F5                                               | <input type="radio"/> | <input type="checkbox"/>                                                                                                                                                                                                                                                                                         |
| F4.1a. Do you have cohabited partner but not formally married at present?                                                                                | 1. Yes; 2. No ---skip to F5<br>If yes, cohabited in __month __year                                                                                                                | <input type="radio"/> | <input type="checkbox"/> <input type="checkbox"/> <input type="checkbox"/> <input type="checkbox"/> <input type="checkbox"/><br><input type="checkbox"/> <input type="checkbox"/> , <input type="checkbox"/> <input type="checkbox"/> <input type="checkbox"/> <input type="checkbox"/> <input type="checkbox"/> |
| F4.2 How many times have you been married?                                                                                                               | ____, if answer 0-- skip to F5                                                                                                                                                    | <input type="radio"/> | <input type="checkbox"/> <input type="checkbox"/>                                                                                                                                                                                                                                                                |

|                                                                         |                                                                                     |                                                                                                                                                                                                                                                                                                                               |                       |                                                   |
|-------------------------------------------------------------------------|-------------------------------------------------------------------------------------|-------------------------------------------------------------------------------------------------------------------------------------------------------------------------------------------------------------------------------------------------------------------------------------------------------------------------------|-----------------------|---------------------------------------------------|
| F4.3 Please tell me your relationship with your spouse in each marriage |                                                                                     |                                                                                                                                                                                                                                                                                                                               |                       |                                                   |
|                                                                         | 1 <sup>st</sup> marriage                                                            | 1 good 2 so so 3 bad                                                                                                                                                                                                                                                                                                          | <input type="radio"/> | <input type="checkbox"/>                          |
|                                                                         | 2 <sup>nd</sup> marriage                                                            | 1 good 2 so so 3 bad                                                                                                                                                                                                                                                                                                          | <input type="radio"/> | <input type="checkbox"/>                          |
|                                                                         | 3 <sup>rd</sup> marriage                                                            | 1 good 2 so so 3 bad                                                                                                                                                                                                                                                                                                          | <input type="radio"/> | <input type="checkbox"/>                          |
|                                                                         | 4 <sup>th</sup> marriage                                                            | 1 good 2 so so 3 bad                                                                                                                                                                                                                                                                                                          | <input type="radio"/> | <input type="checkbox"/>                          |
| F4.4                                                                    | How many years did your last spouse attend school?                                  | _____                                                                                                                                                                                                                                                                                                                         | <input type="radio"/> | <input type="checkbox"/> <input type="checkbox"/> |
|                                                                         |                                                                                     | <i>If she/he never attended school, please '00')</i>                                                                                                                                                                                                                                                                          |                       |                                                   |
| F4.5                                                                    | What was your last spouse's main occupation before age 60?                          | 0 professional or technical personnel/doctors/teachers<br>1 governmental, institutional or managerial personnel<br>2 staff/service worker/industrial worker<br>3 self-employer<br>4 agriculture, forestry, animal husbandry, fishery<br>5 housewife<br>6 military personnel<br>7 unemployed<br>8 other, please specify: _____ | <input type="radio"/> | <input type="checkbox"/>                          |
| F4.6                                                                    | Does your spouse have a paid job at present?                                        | 1 Yes, full time<br>2 Yes, part time 3 No                                                                                                                                                                                                                                                                                     | <input type="radio"/> | <input type="checkbox"/>                          |
| F4.7                                                                    | How do you rate your spouse's health at present?                                    | 1 very good 2 good 3 so so<br>4 bad 5 very bad                                                                                                                                                                                                                                                                                |                       | <input type="checkbox"/>                          |
| F5                                                                      | When you are sick, who usually takes care of you?                                   | 1 spouse<br>2 son<br>3 daughter-in-law<br>4 daughter<br>5 son-in-law<br>6 son and daughter<br>7 grandchildren and their spouses<br>8 other family members<br>9 friends<br>10 social services<br>11 live-in caregiver<br>12 nobody                                                                                             | <input type="radio"/> | <input type="checkbox"/> <input type="checkbox"/> |
| F6.1                                                                    | Can you get adequate medical service when you are sick?                             | 1 yes ( <i>skip to F6.2</i> )<br>2 no                                                                                                                                                                                                                                                                                         | <input type="radio"/> | <input type="checkbox"/>                          |
| F6.1.0                                                                  | What's the primary reason that you didn't go to the hospital when it was necessary? | 1 no money to pay for expenses<br>2 far away<br>3 inconvenient in movement<br>4 nobody with whom to go<br>5 didn't want to go<br>6 other _____                                                                                                                                                                                | <input type="radio"/> | <input type="checkbox"/>                          |

|          |                                                                                                                                        |                                                                                                                                                                                                                                                                                                                  |                       |                                                                                                                                                                                                                                                              |
|----------|----------------------------------------------------------------------------------------------------------------------------------------|------------------------------------------------------------------------------------------------------------------------------------------------------------------------------------------------------------------------------------------------------------------------------------------------------------------|-----------------------|--------------------------------------------------------------------------------------------------------------------------------------------------------------------------------------------------------------------------------------------------------------|
| F6.2     | Could you get adequate medical service when you were sick at around age 60?                                                            | 1 yes 2 no 8 didn't answer                                                                                                                                                                                                                                                                                       | <input type="radio"/> | <input type="checkbox"/>                                                                                                                                                                                                                                     |
| F6.3     | Could you get adequate medical service when you were sick in childhood?                                                                | 1 yes 2 no 8 didn't answer                                                                                                                                                                                                                                                                                       | <input type="radio"/> | <input type="checkbox"/>                                                                                                                                                                                                                                     |
| F6.4     | Do you have following social security and commercialized insurances at present?<br><br><i>If yes, fill in '1'; if no, fill in '0'.</i> | 0 None<br>1 retirement pension<br>2 public old-age insurance<br>3 commercialized old age insurance<br>4 public free medical services<br>5 medical insurance for urban workers and residents<br>6 the new rural cooperative medical insurance<br>7 commercial medical insurance<br>8 other (please specify) _____ | <input type="radio"/> | <input type="checkbox"/><br><input type="checkbox"/><br><input type="checkbox"/><br><input type="checkbox"/><br><input type="checkbox"/><br><input type="checkbox"/><br><input type="checkbox"/><br><input type="checkbox"/>                                 |
| F6.5.1   | How much did you spend on outpatient costs last year?                                                                                  | _____ Yuan ( <i>if more than 100,000, please code 99998</i> )<br>Of which paid by family (self, spouse, children, etc.)<br>_____ Yuan                                                                                                                                                                            | <input type="radio"/> | <input type="checkbox"/> <input type="checkbox"/> <input type="checkbox"/> <input type="checkbox"/> <input type="checkbox"/><br><input type="checkbox"/> <input type="checkbox"/> <input type="checkbox"/> <input type="checkbox"/> <input type="checkbox"/> |
| F6.5.1.a | How much did you spend on inpatient costs last year?                                                                                   | _____ Yuan ( <i>if more than 100,000, please code 99998</i> )<br>Of which paid by family (self, spouse, children, etc.)<br>_____ Yuan                                                                                                                                                                            | <input type="radio"/> | <input type="checkbox"/> <input type="checkbox"/> <input type="checkbox"/> <input type="checkbox"/> <input type="checkbox"/><br><input type="checkbox"/> <input type="checkbox"/> <input type="checkbox"/> <input type="checkbox"/> <input type="checkbox"/> |
| F6.5.2   | Who mainly pays these costs?                                                                                                           | 1 medical insurance for urban workers and residents<br>2 the new rural cooperative medical insurance<br>3 commercial medical insurance<br>4 self<br>5 spouse<br>6 children/grandchildren<br>7 no money to pay<br>8 others                                                                                        | <input type="radio"/> | <input type="checkbox"/>                                                                                                                                                                                                                                     |
| F6.5.2.a | How far from your home to the nearest hospital?                                                                                        | _____ kilometres                                                                                                                                                                                                                                                                                                 |                       |                                                                                                                                                                                                                                                              |
| F6.5.2.b | Do you have regular physical examination once every year?                                                                              | 1 yes 2 no                                                                                                                                                                                                                                                                                                       |                       |                                                                                                                                                                                                                                                              |
| F6.6     | Did you frequently go to bed hungry as a child?                                                                                        | 1 yes 2 no 8 didn't answer                                                                                                                                                                                                                                                                                       | <input type="radio"/> | <input type="checkbox"/>                                                                                                                                                                                                                                     |
| F7.1     | Is your mother alive?                                                                                                                  | 1 yes 2 no--( <i>skip to F7.2.2</i> )<br>( <i>If the elder can't tell the exact age, the interviewer should help her/him recall an approximate one</i> )                                                                                                                                                         | <input type="radio"/> | <input type="checkbox"/>                                                                                                                                                                                                                                     |

|        |                                                  |                                                                                                                                                                                                                                                                                                                               |                       |                                                                            |
|--------|--------------------------------------------------|-------------------------------------------------------------------------------------------------------------------------------------------------------------------------------------------------------------------------------------------------------------------------------------------------------------------------------|-----------------------|----------------------------------------------------------------------------|
| F7.2.1 | If so, how old is she?                           | _____ age --- (skip to F8.1)                                                                                                                                                                                                                                                                                                  | <input type="radio"/> | <input type="checkbox"/> <input type="checkbox"/> <input type="checkbox"/> |
| F7.2.2 | If not, how old was she when she died?           | _____ age (interviewers should help respondent to recall the age, see the survey manual)                                                                                                                                                                                                                                      | <input type="radio"/> | <input type="checkbox"/> <input type="checkbox"/> <input type="checkbox"/> |
| F7.3   | If she is dead, how old were you when she died?  | _____ age<br><i>(If the elder can't tell the exact age, the interviewer should help her/him recall an approximate one)</i>                                                                                                                                                                                                    | <input type="radio"/> | <input type="checkbox"/> <input type="checkbox"/> <input type="checkbox"/> |
| F7.4   | How many years did your mother attend school?    | _____ years<br><i>(If she never attended school, fill '00'.)</i>                                                                                                                                                                                                                                                              | <input type="radio"/> | <input type="checkbox"/> <input type="checkbox"/>                          |
| F8.1   | Is your father alive?                            | 1 yes 2 no --- (skip to F8.2.2)                                                                                                                                                                                                                                                                                               | <input type="radio"/> | <input type="checkbox"/>                                                   |
| F8.2.1 | If so, how old is he?                            | _____ age --- (skip to F8.4)<br><i>(If the elder can't tell the exact age, the interviewer should help her/him recall an approximate one)</i>                                                                                                                                                                                 | <input type="radio"/> | <input type="checkbox"/> <input type="checkbox"/> <input type="checkbox"/> |
| F8.2.2 | If not, how old was he when he died?             | _____ age                                                                                                                                                                                                                                                                                                                     | <input type="radio"/> | <input type="checkbox"/> <input type="checkbox"/> <input type="checkbox"/> |
| F8.3   | If he is dead, how old were you when he died?    | _____ age<br><i>(If the elder can't tell the exact age, the interviewer should help her/him recall an approximate one)</i>                                                                                                                                                                                                    | <input type="radio"/> | <input type="checkbox"/> <input type="checkbox"/> <input type="checkbox"/> |
| F8.4   | The main occupation of your father before age 60 | 0 professional or technical personnel/doctors/teachers<br>1 governmental, institutional or managerial personnel<br>2 staff/service worker/industrial worker<br>3 self-employer<br>4 agriculture, forestry, animal husbandry, fishery<br>5 housewife<br>6 military personnel<br>7 unemployed<br>8 other, please specify: _____ | <input type="radio"/> | <input type="checkbox"/>                                                   |

| <p>F8.5 What was your father's occupation when you were a child?</p>                                                                                                                                                                                                                                                                                                                                                                                                                                                                                                                                                                                                                                                                                                                                                                                                                                                        | <p>0 professional or technical personnel/doctors/teachers<br/>         1 governmental, institutional or managerial personnel<br/>         2 staff/service worker/industrial worker<br/>         3 self-employer<br/>         4 agriculture, forestry, animal husbandry, fishery<br/>         5 housewife 6 military personnel<br/>         7 unemployed 8 other</p>                                                                                                                                                                                                                                                                                                                                                                                                                                                                                                                                                                                                                                                                                                                       | <input type="radio"/>    | <input type="checkbox"/>                                                                              |                          |                          |                          |                          |                 |               |           |   |  |  |  |  |  |  |   |  |   |  |  |  |  |  |   |  |  |                                                                                                                                                                                                                                                                                                                                                                                                                                                                                                                                                                                                                                                                                                                                                        |  |             |     |        |                |                  |               |           |   |                          |                          |                          |                          |                          |                          |                          |   |                          |                          |                          |                          |                          |                          |                          |  |  |  |  |   |  |  |  |  |  |  |  |   |  |  |  |  |  |  |  |   |  |  |  |  |  |  |  |    |  |  |  |  |  |  |  |                                                                                                                                                                                                                                                                                                                                                                                                                                                                                                                                                                                                                                                                                                                                                                                                                                                                                                                                                                                                                                                                                                                                                                                                                                                                                                                                                                                                                                                                                                                                                                                                                                                                                                                                                                                                                                                                                                                                                                                                                                                                                                                                                                                                                                                                                                                                                                                                                                                                                                                                                                                                                                                                                                                                                                                                                                  |  |             |     |              |     |           |        |               |   |                          |                          |                          |                          |                          |                          |                          |   |                          |                          |                          |                          |                          |                          |                          |   |                          |                          |                          |                          |                          |                          |                          |   |                          |                          |                          |                          |                          |                          |                          |   |                          |                          |                          |                          |                          |                          |                          |   |                          |                          |                          |                          |                          |                          |                          |   |                          |                          |                          |                          |                          |                          |                          |   |                          |                          |                          |                          |                          |                          |                          |   |                          |                          |                          |                          |                          |                          |                          |    |                          |                          |                          |                          |                          |                          |                          |
|-----------------------------------------------------------------------------------------------------------------------------------------------------------------------------------------------------------------------------------------------------------------------------------------------------------------------------------------------------------------------------------------------------------------------------------------------------------------------------------------------------------------------------------------------------------------------------------------------------------------------------------------------------------------------------------------------------------------------------------------------------------------------------------------------------------------------------------------------------------------------------------------------------------------------------|-------------------------------------------------------------------------------------------------------------------------------------------------------------------------------------------------------------------------------------------------------------------------------------------------------------------------------------------------------------------------------------------------------------------------------------------------------------------------------------------------------------------------------------------------------------------------------------------------------------------------------------------------------------------------------------------------------------------------------------------------------------------------------------------------------------------------------------------------------------------------------------------------------------------------------------------------------------------------------------------------------------------------------------------------------------------------------------------|--------------------------|-------------------------------------------------------------------------------------------------------|--------------------------|--------------------------|--------------------------|--------------------------|-----------------|---------------|-----------|---|--|--|--|--|--|--|---|--|---|--|--|--|--|--|---|--|--|--------------------------------------------------------------------------------------------------------------------------------------------------------------------------------------------------------------------------------------------------------------------------------------------------------------------------------------------------------------------------------------------------------------------------------------------------------------------------------------------------------------------------------------------------------------------------------------------------------------------------------------------------------------------------------------------------------------------------------------------------------|--|-------------|-----|--------|----------------|------------------|---------------|-----------|---|--------------------------|--------------------------|--------------------------|--------------------------|--------------------------|--------------------------|--------------------------|---|--------------------------|--------------------------|--------------------------|--------------------------|--------------------------|--------------------------|--------------------------|--|--|--|--|---|--|--|--|--|--|--|--|---|--|--|--|--|--|--|--|---|--|--|--|--|--|--|--|----|--|--|--|--|--|--|--|----------------------------------------------------------------------------------------------------------------------------------------------------------------------------------------------------------------------------------------------------------------------------------------------------------------------------------------------------------------------------------------------------------------------------------------------------------------------------------------------------------------------------------------------------------------------------------------------------------------------------------------------------------------------------------------------------------------------------------------------------------------------------------------------------------------------------------------------------------------------------------------------------------------------------------------------------------------------------------------------------------------------------------------------------------------------------------------------------------------------------------------------------------------------------------------------------------------------------------------------------------------------------------------------------------------------------------------------------------------------------------------------------------------------------------------------------------------------------------------------------------------------------------------------------------------------------------------------------------------------------------------------------------------------------------------------------------------------------------------------------------------------------------------------------------------------------------------------------------------------------------------------------------------------------------------------------------------------------------------------------------------------------------------------------------------------------------------------------------------------------------------------------------------------------------------------------------------------------------------------------------------------------------------------------------------------------------------------------------------------------------------------------------------------------------------------------------------------------------------------------------------------------------------------------------------------------------------------------------------------------------------------------------------------------------------------------------------------------------------------------------------------------------------------------------------------------------|--|-------------|-----|--------------|-----|-----------|--------|---------------|---|--------------------------|--------------------------|--------------------------|--------------------------|--------------------------|--------------------------|--------------------------|---|--------------------------|--------------------------|--------------------------|--------------------------|--------------------------|--------------------------|--------------------------|---|--------------------------|--------------------------|--------------------------|--------------------------|--------------------------|--------------------------|--------------------------|---|--------------------------|--------------------------|--------------------------|--------------------------|--------------------------|--------------------------|--------------------------|---|--------------------------|--------------------------|--------------------------|--------------------------|--------------------------|--------------------------|--------------------------|---|--------------------------|--------------------------|--------------------------|--------------------------|--------------------------|--------------------------|--------------------------|---|--------------------------|--------------------------|--------------------------|--------------------------|--------------------------|--------------------------|--------------------------|---|--------------------------|--------------------------|--------------------------|--------------------------|--------------------------|--------------------------|--------------------------|---|--------------------------|--------------------------|--------------------------|--------------------------|--------------------------|--------------------------|--------------------------|----|--------------------------|--------------------------|--------------------------|--------------------------|--------------------------|--------------------------|--------------------------|
| <p>F8.6 How many years of schooling did your father receive?</p>                                                                                                                                                                                                                                                                                                                                                                                                                                                                                                                                                                                                                                                                                                                                                                                                                                                            | <p>_____</p> <p>(If he never attended school, fill '00'.)</p>                                                                                                                                                                                                                                                                                                                                                                                                                                                                                                                                                                                                                                                                                                                                                                                                                                                                                                                                                                                                                             | <input type="radio"/>    | <input type="checkbox"/> <input type="checkbox"/>                                                     |                          |                          |                          |                          |                 |               |           |   |  |  |  |  |  |  |   |  |   |  |  |  |  |  |   |  |  |                                                                                                                                                                                                                                                                                                                                                                                                                                                                                                                                                                                                                                                                                                                                                        |  |             |     |        |                |                  |               |           |   |                          |                          |                          |                          |                          |                          |                          |   |                          |                          |                          |                          |                          |                          |                          |  |  |  |  |   |  |  |  |  |  |  |  |   |  |  |  |  |  |  |  |   |  |  |  |  |  |  |  |    |  |  |  |  |  |  |  |                                                                                                                                                                                                                                                                                                                                                                                                                                                                                                                                                                                                                                                                                                                                                                                                                                                                                                                                                                                                                                                                                                                                                                                                                                                                                                                                                                                                                                                                                                                                                                                                                                                                                                                                                                                                                                                                                                                                                                                                                                                                                                                                                                                                                                                                                                                                                                                                                                                                                                                                                                                                                                                                                                                                                                                                                                  |  |             |     |              |     |           |        |               |   |                          |                          |                          |                          |                          |                          |                          |   |                          |                          |                          |                          |                          |                          |                          |   |                          |                          |                          |                          |                          |                          |                          |   |                          |                          |                          |                          |                          |                          |                          |   |                          |                          |                          |                          |                          |                          |                          |   |                          |                          |                          |                          |                          |                          |                          |   |                          |                          |                          |                          |                          |                          |                          |   |                          |                          |                          |                          |                          |                          |                          |   |                          |                          |                          |                          |                          |                          |                          |    |                          |                          |                          |                          |                          |                          |                          |
| <p>F9.1 What is your birth order among all of your biological siblings?</p>                                                                                                                                                                                                                                                                                                                                                                                                                                                                                                                                                                                                                                                                                                                                                                                                                                                 | <p>_____</p> <p>(If you have no sibling, fill '01' and skip to F10.)</p>                                                                                                                                                                                                                                                                                                                                                                                                                                                                                                                                                                                                                                                                                                                                                                                                                                                                                                                                                                                                                  | <input type="radio"/>    | <input type="checkbox"/> <input type="checkbox"/>                                                     |                          |                          |                          |                          |                 |               |           |   |  |  |  |  |  |  |   |  |   |  |  |  |  |  |   |  |  |                                                                                                                                                                                                                                                                                                                                                                                                                                                                                                                                                                                                                                                                                                                                                        |  |             |     |        |                |                  |               |           |   |                          |                          |                          |                          |                          |                          |                          |   |                          |                          |                          |                          |                          |                          |                          |  |  |  |  |   |  |  |  |  |  |  |  |   |  |  |  |  |  |  |  |   |  |  |  |  |  |  |  |    |  |  |  |  |  |  |  |                                                                                                                                                                                                                                                                                                                                                                                                                                                                                                                                                                                                                                                                                                                                                                                                                                                                                                                                                                                                                                                                                                                                                                                                                                                                                                                                                                                                                                                                                                                                                                                                                                                                                                                                                                                                                                                                                                                                                                                                                                                                                                                                                                                                                                                                                                                                                                                                                                                                                                                                                                                                                                                                                                                                                                                                                                  |  |             |     |              |     |           |        |               |   |                          |                          |                          |                          |                          |                          |                          |   |                          |                          |                          |                          |                          |                          |                          |   |                          |                          |                          |                          |                          |                          |                          |   |                          |                          |                          |                          |                          |                          |                          |   |                          |                          |                          |                          |                          |                          |                          |   |                          |                          |                          |                          |                          |                          |                          |   |                          |                          |                          |                          |                          |                          |                          |   |                          |                          |                          |                          |                          |                          |                          |   |                          |                          |                          |                          |                          |                          |                          |    |                          |                          |                          |                          |                          |                          |                          |
| <p>F9.2 Please tell me about your biological brothers and sisters who live elsewhere or have died, by birth order.</p> <p><b>Sex:</b> 1 male 2 female<br/> <b>Alive or not:</b> 1 yes 2 no<br/> <b>Age:</b> <i>If alive, fill in the age at present. If dead, fill in the age at death.</i><br/> <b>Residence:</b><br/>         1 in the same village/neighborhood<br/>         2 in the same township/district<br/>         3 in the same county/city<br/>         4 in a county/city nearby<br/>         5 elsewhere<br/>         8 unknown<br/> <b>Frequent visits?</b> 1 yes 2 no<br/> <b>Frequent communication?</b> 1 yes 2 no</p> <p><i>(If alive, fill in the place where she/he lives at present. If dead, fill in the place where she/he lived before her/his death.)</i><br/> <i>(If the elder can't remember the exact age of a sibling, the interviewer should help her/him recall an approximate one)</i></p> | <table border="1"> <thead> <tr> <th></th> <th>birth order</th> <th>sex</th> <th>alive or not</th> <th>age</th> <th>residence</th> <th>frequent visits</th> <th>communication</th> </tr> </thead> <tbody> <tr><td>1</td><td></td><td></td><td></td><td></td><td></td><td></td><td></td></tr> <tr><td>2</td><td></td><td></td><td></td><td></td><td></td><td></td><td></td></tr> <tr><td>3</td><td></td><td></td><td></td><td></td><td></td><td></td><td></td></tr> <tr><td>4</td><td></td><td></td><td></td><td></td><td></td><td></td><td></td></tr> <tr><td>5</td><td></td><td></td><td></td><td></td><td></td><td></td><td></td></tr> <tr><td>6</td><td></td><td></td><td></td><td></td><td></td><td></td><td></td></tr> <tr><td>7</td><td></td><td></td><td></td><td></td><td></td><td></td><td></td></tr> <tr><td>8</td><td></td><td></td><td></td><td></td><td></td><td></td><td></td></tr> <tr><td>9</td><td></td><td></td><td></td><td></td><td></td><td></td><td></td></tr> <tr><td>10</td><td></td><td></td><td></td><td></td><td></td><td></td><td></td></tr> </tbody> </table> |                          | birth order                                                                                           | sex                      | alive or not             | age                      | residence                | frequent visits | communication | 1         |   |  |  |  |  |  |  | 2 |  |   |  |  |  |  |  | 3 |  |  |                                                                                                                                                                                                                                                                                                                                                                                                                                                                                                                                                                                                                                                                                                                                                        |  |             |     |        | 4              |                  |               |           |   |                          |                          |                          | 5                        |                          |                          |                          |   |                          |                          |                          | 6                        |                          |                          |                          |  |  |  |  | 7 |  |  |  |  |  |  |  | 8 |  |  |  |  |  |  |  | 9 |  |  |  |  |  |  |  | 10 |  |  |  |  |  |  |  | <table border="1"> <thead> <tr> <th></th> <th>birth order</th> <th>sex</th> <th>alive or not</th> <th>age</th> <th>residence</th> <th>visits</th> <th>communication</th> </tr> </thead> <tbody> <tr><td>1</td><td><input type="checkbox"/></td><td><input type="checkbox"/></td><td><input type="checkbox"/></td><td><input type="checkbox"/></td><td><input type="checkbox"/></td><td><input type="checkbox"/></td><td><input type="checkbox"/></td></tr> <tr><td>2</td><td><input type="checkbox"/></td><td><input type="checkbox"/></td><td><input type="checkbox"/></td><td><input type="checkbox"/></td><td><input type="checkbox"/></td><td><input type="checkbox"/></td><td><input type="checkbox"/></td></tr> <tr><td>3</td><td><input type="checkbox"/></td><td><input type="checkbox"/></td><td><input type="checkbox"/></td><td><input type="checkbox"/></td><td><input type="checkbox"/></td><td><input type="checkbox"/></td><td><input type="checkbox"/></td></tr> <tr><td>4</td><td><input type="checkbox"/></td><td><input type="checkbox"/></td><td><input type="checkbox"/></td><td><input type="checkbox"/></td><td><input type="checkbox"/></td><td><input type="checkbox"/></td><td><input type="checkbox"/></td></tr> <tr><td>5</td><td><input type="checkbox"/></td><td><input type="checkbox"/></td><td><input type="checkbox"/></td><td><input type="checkbox"/></td><td><input type="checkbox"/></td><td><input type="checkbox"/></td><td><input type="checkbox"/></td></tr> <tr><td>6</td><td><input type="checkbox"/></td><td><input type="checkbox"/></td><td><input type="checkbox"/></td><td><input type="checkbox"/></td><td><input type="checkbox"/></td><td><input type="checkbox"/></td><td><input type="checkbox"/></td></tr> <tr><td>7</td><td><input type="checkbox"/></td><td><input type="checkbox"/></td><td><input type="checkbox"/></td><td><input type="checkbox"/></td><td><input type="checkbox"/></td><td><input type="checkbox"/></td><td><input type="checkbox"/></td></tr> <tr><td>8</td><td><input type="checkbox"/></td><td><input type="checkbox"/></td><td><input type="checkbox"/></td><td><input type="checkbox"/></td><td><input type="checkbox"/></td><td><input type="checkbox"/></td><td><input type="checkbox"/></td></tr> <tr><td>9</td><td><input type="checkbox"/></td><td><input type="checkbox"/></td><td><input type="checkbox"/></td><td><input type="checkbox"/></td><td><input type="checkbox"/></td><td><input type="checkbox"/></td><td><input type="checkbox"/></td></tr> <tr><td>10</td><td><input type="checkbox"/></td><td><input type="checkbox"/></td><td><input type="checkbox"/></td><td><input type="checkbox"/></td><td><input type="checkbox"/></td><td><input type="checkbox"/></td><td><input type="checkbox"/></td></tr> </tbody> </table> |  | birth order | sex | alive or not | age | residence | visits | communication | 1 | <input type="checkbox"/> | <input type="checkbox"/> | <input type="checkbox"/> | <input type="checkbox"/> | <input type="checkbox"/> | <input type="checkbox"/> | <input type="checkbox"/> | 2 | <input type="checkbox"/> | <input type="checkbox"/> | <input type="checkbox"/> | <input type="checkbox"/> | <input type="checkbox"/> | <input type="checkbox"/> | <input type="checkbox"/> | 3 | <input type="checkbox"/> | <input type="checkbox"/> | <input type="checkbox"/> | <input type="checkbox"/> | <input type="checkbox"/> | <input type="checkbox"/> | <input type="checkbox"/> | 4 | <input type="checkbox"/> | <input type="checkbox"/> | <input type="checkbox"/> | <input type="checkbox"/> | <input type="checkbox"/> | <input type="checkbox"/> | <input type="checkbox"/> | 5 | <input type="checkbox"/> | <input type="checkbox"/> | <input type="checkbox"/> | <input type="checkbox"/> | <input type="checkbox"/> | <input type="checkbox"/> | <input type="checkbox"/> | 6 | <input type="checkbox"/> | <input type="checkbox"/> | <input type="checkbox"/> | <input type="checkbox"/> | <input type="checkbox"/> | <input type="checkbox"/> | <input type="checkbox"/> | 7 | <input type="checkbox"/> | <input type="checkbox"/> | <input type="checkbox"/> | <input type="checkbox"/> | <input type="checkbox"/> | <input type="checkbox"/> | <input type="checkbox"/> | 8 | <input type="checkbox"/> | <input type="checkbox"/> | <input type="checkbox"/> | <input type="checkbox"/> | <input type="checkbox"/> | <input type="checkbox"/> | <input type="checkbox"/> | 9 | <input type="checkbox"/> | <input type="checkbox"/> | <input type="checkbox"/> | <input type="checkbox"/> | <input type="checkbox"/> | <input type="checkbox"/> | <input type="checkbox"/> | 10 | <input type="checkbox"/> | <input type="checkbox"/> | <input type="checkbox"/> | <input type="checkbox"/> | <input type="checkbox"/> | <input type="checkbox"/> | <input type="checkbox"/> |
|                                                                                                                                                                                                                                                                                                                                                                                                                                                                                                                                                                                                                                                                                                                                                                                                                                                                                                                             | birth order                                                                                                                                                                                                                                                                                                                                                                                                                                                                                                                                                                                                                                                                                                                                                                                                                                                                                                                                                                                                                                                                               | sex                      | alive or not                                                                                          | age                      | residence                | frequent visits          | communication            |                 |               |           |   |  |  |  |  |  |  |   |  |   |  |  |  |  |  |   |  |  |                                                                                                                                                                                                                                                                                                                                                                                                                                                                                                                                                                                                                                                                                                                                                        |  |             |     |        |                |                  |               |           |   |                          |                          |                          |                          |                          |                          |                          |   |                          |                          |                          |                          |                          |                          |                          |  |  |  |  |   |  |  |  |  |  |  |  |   |  |  |  |  |  |  |  |   |  |  |  |  |  |  |  |    |  |  |  |  |  |  |  |                                                                                                                                                                                                                                                                                                                                                                                                                                                                                                                                                                                                                                                                                                                                                                                                                                                                                                                                                                                                                                                                                                                                                                                                                                                                                                                                                                                                                                                                                                                                                                                                                                                                                                                                                                                                                                                                                                                                                                                                                                                                                                                                                                                                                                                                                                                                                                                                                                                                                                                                                                                                                                                                                                                                                                                                                                  |  |             |     |              |     |           |        |               |   |                          |                          |                          |                          |                          |                          |                          |   |                          |                          |                          |                          |                          |                          |                          |   |                          |                          |                          |                          |                          |                          |                          |   |                          |                          |                          |                          |                          |                          |                          |   |                          |                          |                          |                          |                          |                          |                          |   |                          |                          |                          |                          |                          |                          |                          |   |                          |                          |                          |                          |                          |                          |                          |   |                          |                          |                          |                          |                          |                          |                          |   |                          |                          |                          |                          |                          |                          |                          |    |                          |                          |                          |                          |                          |                          |                          |
| 1                                                                                                                                                                                                                                                                                                                                                                                                                                                                                                                                                                                                                                                                                                                                                                                                                                                                                                                           |                                                                                                                                                                                                                                                                                                                                                                                                                                                                                                                                                                                                                                                                                                                                                                                                                                                                                                                                                                                                                                                                                           |                          |                                                                                                       |                          |                          |                          |                          |                 |               |           |   |  |  |  |  |  |  |   |  |   |  |  |  |  |  |   |  |  |                                                                                                                                                                                                                                                                                                                                                                                                                                                                                                                                                                                                                                                                                                                                                        |  |             |     |        |                |                  |               |           |   |                          |                          |                          |                          |                          |                          |                          |   |                          |                          |                          |                          |                          |                          |                          |  |  |  |  |   |  |  |  |  |  |  |  |   |  |  |  |  |  |  |  |   |  |  |  |  |  |  |  |    |  |  |  |  |  |  |  |                                                                                                                                                                                                                                                                                                                                                                                                                                                                                                                                                                                                                                                                                                                                                                                                                                                                                                                                                                                                                                                                                                                                                                                                                                                                                                                                                                                                                                                                                                                                                                                                                                                                                                                                                                                                                                                                                                                                                                                                                                                                                                                                                                                                                                                                                                                                                                                                                                                                                                                                                                                                                                                                                                                                                                                                                                  |  |             |     |              |     |           |        |               |   |                          |                          |                          |                          |                          |                          |                          |   |                          |                          |                          |                          |                          |                          |                          |   |                          |                          |                          |                          |                          |                          |                          |   |                          |                          |                          |                          |                          |                          |                          |   |                          |                          |                          |                          |                          |                          |                          |   |                          |                          |                          |                          |                          |                          |                          |   |                          |                          |                          |                          |                          |                          |                          |   |                          |                          |                          |                          |                          |                          |                          |   |                          |                          |                          |                          |                          |                          |                          |    |                          |                          |                          |                          |                          |                          |                          |
| 2                                                                                                                                                                                                                                                                                                                                                                                                                                                                                                                                                                                                                                                                                                                                                                                                                                                                                                                           |                                                                                                                                                                                                                                                                                                                                                                                                                                                                                                                                                                                                                                                                                                                                                                                                                                                                                                                                                                                                                                                                                           |                          |                                                                                                       |                          |                          |                          |                          |                 |               |           |   |  |  |  |  |  |  |   |  |   |  |  |  |  |  |   |  |  |                                                                                                                                                                                                                                                                                                                                                                                                                                                                                                                                                                                                                                                                                                                                                        |  |             |     |        |                |                  |               |           |   |                          |                          |                          |                          |                          |                          |                          |   |                          |                          |                          |                          |                          |                          |                          |  |  |  |  |   |  |  |  |  |  |  |  |   |  |  |  |  |  |  |  |   |  |  |  |  |  |  |  |    |  |  |  |  |  |  |  |                                                                                                                                                                                                                                                                                                                                                                                                                                                                                                                                                                                                                                                                                                                                                                                                                                                                                                                                                                                                                                                                                                                                                                                                                                                                                                                                                                                                                                                                                                                                                                                                                                                                                                                                                                                                                                                                                                                                                                                                                                                                                                                                                                                                                                                                                                                                                                                                                                                                                                                                                                                                                                                                                                                                                                                                                                  |  |             |     |              |     |           |        |               |   |                          |                          |                          |                          |                          |                          |                          |   |                          |                          |                          |                          |                          |                          |                          |   |                          |                          |                          |                          |                          |                          |                          |   |                          |                          |                          |                          |                          |                          |                          |   |                          |                          |                          |                          |                          |                          |                          |   |                          |                          |                          |                          |                          |                          |                          |   |                          |                          |                          |                          |                          |                          |                          |   |                          |                          |                          |                          |                          |                          |                          |   |                          |                          |                          |                          |                          |                          |                          |    |                          |                          |                          |                          |                          |                          |                          |
| 3                                                                                                                                                                                                                                                                                                                                                                                                                                                                                                                                                                                                                                                                                                                                                                                                                                                                                                                           |                                                                                                                                                                                                                                                                                                                                                                                                                                                                                                                                                                                                                                                                                                                                                                                                                                                                                                                                                                                                                                                                                           |                          |                                                                                                       |                          |                          |                          |                          |                 |               |           |   |  |  |  |  |  |  |   |  |   |  |  |  |  |  |   |  |  |                                                                                                                                                                                                                                                                                                                                                                                                                                                                                                                                                                                                                                                                                                                                                        |  |             |     |        |                |                  |               |           |   |                          |                          |                          |                          |                          |                          |                          |   |                          |                          |                          |                          |                          |                          |                          |  |  |  |  |   |  |  |  |  |  |  |  |   |  |  |  |  |  |  |  |   |  |  |  |  |  |  |  |    |  |  |  |  |  |  |  |                                                                                                                                                                                                                                                                                                                                                                                                                                                                                                                                                                                                                                                                                                                                                                                                                                                                                                                                                                                                                                                                                                                                                                                                                                                                                                                                                                                                                                                                                                                                                                                                                                                                                                                                                                                                                                                                                                                                                                                                                                                                                                                                                                                                                                                                                                                                                                                                                                                                                                                                                                                                                                                                                                                                                                                                                                  |  |             |     |              |     |           |        |               |   |                          |                          |                          |                          |                          |                          |                          |   |                          |                          |                          |                          |                          |                          |                          |   |                          |                          |                          |                          |                          |                          |                          |   |                          |                          |                          |                          |                          |                          |                          |   |                          |                          |                          |                          |                          |                          |                          |   |                          |                          |                          |                          |                          |                          |                          |   |                          |                          |                          |                          |                          |                          |                          |   |                          |                          |                          |                          |                          |                          |                          |   |                          |                          |                          |                          |                          |                          |                          |    |                          |                          |                          |                          |                          |                          |                          |
| 4                                                                                                                                                                                                                                                                                                                                                                                                                                                                                                                                                                                                                                                                                                                                                                                                                                                                                                                           |                                                                                                                                                                                                                                                                                                                                                                                                                                                                                                                                                                                                                                                                                                                                                                                                                                                                                                                                                                                                                                                                                           |                          |                                                                                                       |                          |                          |                          |                          |                 |               |           |   |  |  |  |  |  |  |   |  |   |  |  |  |  |  |   |  |  |                                                                                                                                                                                                                                                                                                                                                                                                                                                                                                                                                                                                                                                                                                                                                        |  |             |     |        |                |                  |               |           |   |                          |                          |                          |                          |                          |                          |                          |   |                          |                          |                          |                          |                          |                          |                          |  |  |  |  |   |  |  |  |  |  |  |  |   |  |  |  |  |  |  |  |   |  |  |  |  |  |  |  |    |  |  |  |  |  |  |  |                                                                                                                                                                                                                                                                                                                                                                                                                                                                                                                                                                                                                                                                                                                                                                                                                                                                                                                                                                                                                                                                                                                                                                                                                                                                                                                                                                                                                                                                                                                                                                                                                                                                                                                                                                                                                                                                                                                                                                                                                                                                                                                                                                                                                                                                                                                                                                                                                                                                                                                                                                                                                                                                                                                                                                                                                                  |  |             |     |              |     |           |        |               |   |                          |                          |                          |                          |                          |                          |                          |   |                          |                          |                          |                          |                          |                          |                          |   |                          |                          |                          |                          |                          |                          |                          |   |                          |                          |                          |                          |                          |                          |                          |   |                          |                          |                          |                          |                          |                          |                          |   |                          |                          |                          |                          |                          |                          |                          |   |                          |                          |                          |                          |                          |                          |                          |   |                          |                          |                          |                          |                          |                          |                          |   |                          |                          |                          |                          |                          |                          |                          |    |                          |                          |                          |                          |                          |                          |                          |
| 5                                                                                                                                                                                                                                                                                                                                                                                                                                                                                                                                                                                                                                                                                                                                                                                                                                                                                                                           |                                                                                                                                                                                                                                                                                                                                                                                                                                                                                                                                                                                                                                                                                                                                                                                                                                                                                                                                                                                                                                                                                           |                          |                                                                                                       |                          |                          |                          |                          |                 |               |           |   |  |  |  |  |  |  |   |  |   |  |  |  |  |  |   |  |  |                                                                                                                                                                                                                                                                                                                                                                                                                                                                                                                                                                                                                                                                                                                                                        |  |             |     |        |                |                  |               |           |   |                          |                          |                          |                          |                          |                          |                          |   |                          |                          |                          |                          |                          |                          |                          |  |  |  |  |   |  |  |  |  |  |  |  |   |  |  |  |  |  |  |  |   |  |  |  |  |  |  |  |    |  |  |  |  |  |  |  |                                                                                                                                                                                                                                                                                                                                                                                                                                                                                                                                                                                                                                                                                                                                                                                                                                                                                                                                                                                                                                                                                                                                                                                                                                                                                                                                                                                                                                                                                                                                                                                                                                                                                                                                                                                                                                                                                                                                                                                                                                                                                                                                                                                                                                                                                                                                                                                                                                                                                                                                                                                                                                                                                                                                                                                                                                  |  |             |     |              |     |           |        |               |   |                          |                          |                          |                          |                          |                          |                          |   |                          |                          |                          |                          |                          |                          |                          |   |                          |                          |                          |                          |                          |                          |                          |   |                          |                          |                          |                          |                          |                          |                          |   |                          |                          |                          |                          |                          |                          |                          |   |                          |                          |                          |                          |                          |                          |                          |   |                          |                          |                          |                          |                          |                          |                          |   |                          |                          |                          |                          |                          |                          |                          |   |                          |                          |                          |                          |                          |                          |                          |    |                          |                          |                          |                          |                          |                          |                          |
| 6                                                                                                                                                                                                                                                                                                                                                                                                                                                                                                                                                                                                                                                                                                                                                                                                                                                                                                                           |                                                                                                                                                                                                                                                                                                                                                                                                                                                                                                                                                                                                                                                                                                                                                                                                                                                                                                                                                                                                                                                                                           |                          |                                                                                                       |                          |                          |                          |                          |                 |               |           |   |  |  |  |  |  |  |   |  |   |  |  |  |  |  |   |  |  |                                                                                                                                                                                                                                                                                                                                                                                                                                                                                                                                                                                                                                                                                                                                                        |  |             |     |        |                |                  |               |           |   |                          |                          |                          |                          |                          |                          |                          |   |                          |                          |                          |                          |                          |                          |                          |  |  |  |  |   |  |  |  |  |  |  |  |   |  |  |  |  |  |  |  |   |  |  |  |  |  |  |  |    |  |  |  |  |  |  |  |                                                                                                                                                                                                                                                                                                                                                                                                                                                                                                                                                                                                                                                                                                                                                                                                                                                                                                                                                                                                                                                                                                                                                                                                                                                                                                                                                                                                                                                                                                                                                                                                                                                                                                                                                                                                                                                                                                                                                                                                                                                                                                                                                                                                                                                                                                                                                                                                                                                                                                                                                                                                                                                                                                                                                                                                                                  |  |             |     |              |     |           |        |               |   |                          |                          |                          |                          |                          |                          |                          |   |                          |                          |                          |                          |                          |                          |                          |   |                          |                          |                          |                          |                          |                          |                          |   |                          |                          |                          |                          |                          |                          |                          |   |                          |                          |                          |                          |                          |                          |                          |   |                          |                          |                          |                          |                          |                          |                          |   |                          |                          |                          |                          |                          |                          |                          |   |                          |                          |                          |                          |                          |                          |                          |   |                          |                          |                          |                          |                          |                          |                          |    |                          |                          |                          |                          |                          |                          |                          |
| 7                                                                                                                                                                                                                                                                                                                                                                                                                                                                                                                                                                                                                                                                                                                                                                                                                                                                                                                           |                                                                                                                                                                                                                                                                                                                                                                                                                                                                                                                                                                                                                                                                                                                                                                                                                                                                                                                                                                                                                                                                                           |                          |                                                                                                       |                          |                          |                          |                          |                 |               |           |   |  |  |  |  |  |  |   |  |   |  |  |  |  |  |   |  |  |                                                                                                                                                                                                                                                                                                                                                                                                                                                                                                                                                                                                                                                                                                                                                        |  |             |     |        |                |                  |               |           |   |                          |                          |                          |                          |                          |                          |                          |   |                          |                          |                          |                          |                          |                          |                          |  |  |  |  |   |  |  |  |  |  |  |  |   |  |  |  |  |  |  |  |   |  |  |  |  |  |  |  |    |  |  |  |  |  |  |  |                                                                                                                                                                                                                                                                                                                                                                                                                                                                                                                                                                                                                                                                                                                                                                                                                                                                                                                                                                                                                                                                                                                                                                                                                                                                                                                                                                                                                                                                                                                                                                                                                                                                                                                                                                                                                                                                                                                                                                                                                                                                                                                                                                                                                                                                                                                                                                                                                                                                                                                                                                                                                                                                                                                                                                                                                                  |  |             |     |              |     |           |        |               |   |                          |                          |                          |                          |                          |                          |                          |   |                          |                          |                          |                          |                          |                          |                          |   |                          |                          |                          |                          |                          |                          |                          |   |                          |                          |                          |                          |                          |                          |                          |   |                          |                          |                          |                          |                          |                          |                          |   |                          |                          |                          |                          |                          |                          |                          |   |                          |                          |                          |                          |                          |                          |                          |   |                          |                          |                          |                          |                          |                          |                          |   |                          |                          |                          |                          |                          |                          |                          |    |                          |                          |                          |                          |                          |                          |                          |
| 8                                                                                                                                                                                                                                                                                                                                                                                                                                                                                                                                                                                                                                                                                                                                                                                                                                                                                                                           |                                                                                                                                                                                                                                                                                                                                                                                                                                                                                                                                                                                                                                                                                                                                                                                                                                                                                                                                                                                                                                                                                           |                          |                                                                                                       |                          |                          |                          |                          |                 |               |           |   |  |  |  |  |  |  |   |  |   |  |  |  |  |  |   |  |  |                                                                                                                                                                                                                                                                                                                                                                                                                                                                                                                                                                                                                                                                                                                                                        |  |             |     |        |                |                  |               |           |   |                          |                          |                          |                          |                          |                          |                          |   |                          |                          |                          |                          |                          |                          |                          |  |  |  |  |   |  |  |  |  |  |  |  |   |  |  |  |  |  |  |  |   |  |  |  |  |  |  |  |    |  |  |  |  |  |  |  |                                                                                                                                                                                                                                                                                                                                                                                                                                                                                                                                                                                                                                                                                                                                                                                                                                                                                                                                                                                                                                                                                                                                                                                                                                                                                                                                                                                                                                                                                                                                                                                                                                                                                                                                                                                                                                                                                                                                                                                                                                                                                                                                                                                                                                                                                                                                                                                                                                                                                                                                                                                                                                                                                                                                                                                                                                  |  |             |     |              |     |           |        |               |   |                          |                          |                          |                          |                          |                          |                          |   |                          |                          |                          |                          |                          |                          |                          |   |                          |                          |                          |                          |                          |                          |                          |   |                          |                          |                          |                          |                          |                          |                          |   |                          |                          |                          |                          |                          |                          |                          |   |                          |                          |                          |                          |                          |                          |                          |   |                          |                          |                          |                          |                          |                          |                          |   |                          |                          |                          |                          |                          |                          |                          |   |                          |                          |                          |                          |                          |                          |                          |    |                          |                          |                          |                          |                          |                          |                          |
| 9                                                                                                                                                                                                                                                                                                                                                                                                                                                                                                                                                                                                                                                                                                                                                                                                                                                                                                                           |                                                                                                                                                                                                                                                                                                                                                                                                                                                                                                                                                                                                                                                                                                                                                                                                                                                                                                                                                                                                                                                                                           |                          |                                                                                                       |                          |                          |                          |                          |                 |               |           |   |  |  |  |  |  |  |   |  |   |  |  |  |  |  |   |  |  |                                                                                                                                                                                                                                                                                                                                                                                                                                                                                                                                                                                                                                                                                                                                                        |  |             |     |        |                |                  |               |           |   |                          |                          |                          |                          |                          |                          |                          |   |                          |                          |                          |                          |                          |                          |                          |  |  |  |  |   |  |  |  |  |  |  |  |   |  |  |  |  |  |  |  |   |  |  |  |  |  |  |  |    |  |  |  |  |  |  |  |                                                                                                                                                                                                                                                                                                                                                                                                                                                                                                                                                                                                                                                                                                                                                                                                                                                                                                                                                                                                                                                                                                                                                                                                                                                                                                                                                                                                                                                                                                                                                                                                                                                                                                                                                                                                                                                                                                                                                                                                                                                                                                                                                                                                                                                                                                                                                                                                                                                                                                                                                                                                                                                                                                                                                                                                                                  |  |             |     |              |     |           |        |               |   |                          |                          |                          |                          |                          |                          |                          |   |                          |                          |                          |                          |                          |                          |                          |   |                          |                          |                          |                          |                          |                          |                          |   |                          |                          |                          |                          |                          |                          |                          |   |                          |                          |                          |                          |                          |                          |                          |   |                          |                          |                          |                          |                          |                          |                          |   |                          |                          |                          |                          |                          |                          |                          |   |                          |                          |                          |                          |                          |                          |                          |   |                          |                          |                          |                          |                          |                          |                          |    |                          |                          |                          |                          |                          |                          |                          |
| 10                                                                                                                                                                                                                                                                                                                                                                                                                                                                                                                                                                                                                                                                                                                                                                                                                                                                                                                          |                                                                                                                                                                                                                                                                                                                                                                                                                                                                                                                                                                                                                                                                                                                                                                                                                                                                                                                                                                                                                                                                                           |                          |                                                                                                       |                          |                          |                          |                          |                 |               |           |   |  |  |  |  |  |  |   |  |   |  |  |  |  |  |   |  |  |                                                                                                                                                                                                                                                                                                                                                                                                                                                                                                                                                                                                                                                                                                                                                        |  |             |     |        |                |                  |               |           |   |                          |                          |                          |                          |                          |                          |                          |   |                          |                          |                          |                          |                          |                          |                          |  |  |  |  |   |  |  |  |  |  |  |  |   |  |  |  |  |  |  |  |   |  |  |  |  |  |  |  |    |  |  |  |  |  |  |  |                                                                                                                                                                                                                                                                                                                                                                                                                                                                                                                                                                                                                                                                                                                                                                                                                                                                                                                                                                                                                                                                                                                                                                                                                                                                                                                                                                                                                                                                                                                                                                                                                                                                                                                                                                                                                                                                                                                                                                                                                                                                                                                                                                                                                                                                                                                                                                                                                                                                                                                                                                                                                                                                                                                                                                                                                                  |  |             |     |              |     |           |        |               |   |                          |                          |                          |                          |                          |                          |                          |   |                          |                          |                          |                          |                          |                          |                          |   |                          |                          |                          |                          |                          |                          |                          |   |                          |                          |                          |                          |                          |                          |                          |   |                          |                          |                          |                          |                          |                          |                          |   |                          |                          |                          |                          |                          |                          |                          |   |                          |                          |                          |                          |                          |                          |                          |   |                          |                          |                          |                          |                          |                          |                          |   |                          |                          |                          |                          |                          |                          |                          |    |                          |                          |                          |                          |                          |                          |                          |
|                                                                                                                                                                                                                                                                                                                                                                                                                                                                                                                                                                                                                                                                                                                                                                                                                                                                                                                             | birth order                                                                                                                                                                                                                                                                                                                                                                                                                                                                                                                                                                                                                                                                                                                                                                                                                                                                                                                                                                                                                                                                               | sex                      | alive or not                                                                                          | age                      | residence                | visits                   | communication            |                 |               |           |   |  |  |  |  |  |  |   |  |   |  |  |  |  |  |   |  |  |                                                                                                                                                                                                                                                                                                                                                                                                                                                                                                                                                                                                                                                                                                                                                        |  |             |     |        |                |                  |               |           |   |                          |                          |                          |                          |                          |                          |                          |   |                          |                          |                          |                          |                          |                          |                          |  |  |  |  |   |  |  |  |  |  |  |  |   |  |  |  |  |  |  |  |   |  |  |  |  |  |  |  |    |  |  |  |  |  |  |  |                                                                                                                                                                                                                                                                                                                                                                                                                                                                                                                                                                                                                                                                                                                                                                                                                                                                                                                                                                                                                                                                                                                                                                                                                                                                                                                                                                                                                                                                                                                                                                                                                                                                                                                                                                                                                                                                                                                                                                                                                                                                                                                                                                                                                                                                                                                                                                                                                                                                                                                                                                                                                                                                                                                                                                                                                                  |  |             |     |              |     |           |        |               |   |                          |                          |                          |                          |                          |                          |                          |   |                          |                          |                          |                          |                          |                          |                          |   |                          |                          |                          |                          |                          |                          |                          |   |                          |                          |                          |                          |                          |                          |                          |   |                          |                          |                          |                          |                          |                          |                          |   |                          |                          |                          |                          |                          |                          |                          |   |                          |                          |                          |                          |                          |                          |                          |   |                          |                          |                          |                          |                          |                          |                          |   |                          |                          |                          |                          |                          |                          |                          |    |                          |                          |                          |                          |                          |                          |                          |
| 1                                                                                                                                                                                                                                                                                                                                                                                                                                                                                                                                                                                                                                                                                                                                                                                                                                                                                                                           | <input type="checkbox"/>                                                                                                                                                                                                                                                                                                                                                                                                                                                                                                                                                                                                                                                                                                                                                                                                                                                                                                                                                                                                                                                                  | <input type="checkbox"/> | <input type="checkbox"/>                                                                              | <input type="checkbox"/> | <input type="checkbox"/> | <input type="checkbox"/> | <input type="checkbox"/> |                 |               |           |   |  |  |  |  |  |  |   |  |   |  |  |  |  |  |   |  |  |                                                                                                                                                                                                                                                                                                                                                                                                                                                                                                                                                                                                                                                                                                                                                        |  |             |     |        |                |                  |               |           |   |                          |                          |                          |                          |                          |                          |                          |   |                          |                          |                          |                          |                          |                          |                          |  |  |  |  |   |  |  |  |  |  |  |  |   |  |  |  |  |  |  |  |   |  |  |  |  |  |  |  |    |  |  |  |  |  |  |  |                                                                                                                                                                                                                                                                                                                                                                                                                                                                                                                                                                                                                                                                                                                                                                                                                                                                                                                                                                                                                                                                                                                                                                                                                                                                                                                                                                                                                                                                                                                                                                                                                                                                                                                                                                                                                                                                                                                                                                                                                                                                                                                                                                                                                                                                                                                                                                                                                                                                                                                                                                                                                                                                                                                                                                                                                                  |  |             |     |              |     |           |        |               |   |                          |                          |                          |                          |                          |                          |                          |   |                          |                          |                          |                          |                          |                          |                          |   |                          |                          |                          |                          |                          |                          |                          |   |                          |                          |                          |                          |                          |                          |                          |   |                          |                          |                          |                          |                          |                          |                          |   |                          |                          |                          |                          |                          |                          |                          |   |                          |                          |                          |                          |                          |                          |                          |   |                          |                          |                          |                          |                          |                          |                          |   |                          |                          |                          |                          |                          |                          |                          |    |                          |                          |                          |                          |                          |                          |                          |
| 2                                                                                                                                                                                                                                                                                                                                                                                                                                                                                                                                                                                                                                                                                                                                                                                                                                                                                                                           | <input type="checkbox"/>                                                                                                                                                                                                                                                                                                                                                                                                                                                                                                                                                                                                                                                                                                                                                                                                                                                                                                                                                                                                                                                                  | <input type="checkbox"/> | <input type="checkbox"/>                                                                              | <input type="checkbox"/> | <input type="checkbox"/> | <input type="checkbox"/> | <input type="checkbox"/> |                 |               |           |   |  |  |  |  |  |  |   |  |   |  |  |  |  |  |   |  |  |                                                                                                                                                                                                                                                                                                                                                                                                                                                                                                                                                                                                                                                                                                                                                        |  |             |     |        |                |                  |               |           |   |                          |                          |                          |                          |                          |                          |                          |   |                          |                          |                          |                          |                          |                          |                          |  |  |  |  |   |  |  |  |  |  |  |  |   |  |  |  |  |  |  |  |   |  |  |  |  |  |  |  |    |  |  |  |  |  |  |  |                                                                                                                                                                                                                                                                                                                                                                                                                                                                                                                                                                                                                                                                                                                                                                                                                                                                                                                                                                                                                                                                                                                                                                                                                                                                                                                                                                                                                                                                                                                                                                                                                                                                                                                                                                                                                                                                                                                                                                                                                                                                                                                                                                                                                                                                                                                                                                                                                                                                                                                                                                                                                                                                                                                                                                                                                                  |  |             |     |              |     |           |        |               |   |                          |                          |                          |                          |                          |                          |                          |   |                          |                          |                          |                          |                          |                          |                          |   |                          |                          |                          |                          |                          |                          |                          |   |                          |                          |                          |                          |                          |                          |                          |   |                          |                          |                          |                          |                          |                          |                          |   |                          |                          |                          |                          |                          |                          |                          |   |                          |                          |                          |                          |                          |                          |                          |   |                          |                          |                          |                          |                          |                          |                          |   |                          |                          |                          |                          |                          |                          |                          |    |                          |                          |                          |                          |                          |                          |                          |
| 3                                                                                                                                                                                                                                                                                                                                                                                                                                                                                                                                                                                                                                                                                                                                                                                                                                                                                                                           | <input type="checkbox"/>                                                                                                                                                                                                                                                                                                                                                                                                                                                                                                                                                                                                                                                                                                                                                                                                                                                                                                                                                                                                                                                                  | <input type="checkbox"/> | <input type="checkbox"/>                                                                              | <input type="checkbox"/> | <input type="checkbox"/> | <input type="checkbox"/> | <input type="checkbox"/> |                 |               |           |   |  |  |  |  |  |  |   |  |   |  |  |  |  |  |   |  |  |                                                                                                                                                                                                                                                                                                                                                                                                                                                                                                                                                                                                                                                                                                                                                        |  |             |     |        |                |                  |               |           |   |                          |                          |                          |                          |                          |                          |                          |   |                          |                          |                          |                          |                          |                          |                          |  |  |  |  |   |  |  |  |  |  |  |  |   |  |  |  |  |  |  |  |   |  |  |  |  |  |  |  |    |  |  |  |  |  |  |  |                                                                                                                                                                                                                                                                                                                                                                                                                                                                                                                                                                                                                                                                                                                                                                                                                                                                                                                                                                                                                                                                                                                                                                                                                                                                                                                                                                                                                                                                                                                                                                                                                                                                                                                                                                                                                                                                                                                                                                                                                                                                                                                                                                                                                                                                                                                                                                                                                                                                                                                                                                                                                                                                                                                                                                                                                                  |  |             |     |              |     |           |        |               |   |                          |                          |                          |                          |                          |                          |                          |   |                          |                          |                          |                          |                          |                          |                          |   |                          |                          |                          |                          |                          |                          |                          |   |                          |                          |                          |                          |                          |                          |                          |   |                          |                          |                          |                          |                          |                          |                          |   |                          |                          |                          |                          |                          |                          |                          |   |                          |                          |                          |                          |                          |                          |                          |   |                          |                          |                          |                          |                          |                          |                          |   |                          |                          |                          |                          |                          |                          |                          |    |                          |                          |                          |                          |                          |                          |                          |
| 4                                                                                                                                                                                                                                                                                                                                                                                                                                                                                                                                                                                                                                                                                                                                                                                                                                                                                                                           | <input type="checkbox"/>                                                                                                                                                                                                                                                                                                                                                                                                                                                                                                                                                                                                                                                                                                                                                                                                                                                                                                                                                                                                                                                                  | <input type="checkbox"/> | <input type="checkbox"/>                                                                              | <input type="checkbox"/> | <input type="checkbox"/> | <input type="checkbox"/> | <input type="checkbox"/> |                 |               |           |   |  |  |  |  |  |  |   |  |   |  |  |  |  |  |   |  |  |                                                                                                                                                                                                                                                                                                                                                                                                                                                                                                                                                                                                                                                                                                                                                        |  |             |     |        |                |                  |               |           |   |                          |                          |                          |                          |                          |                          |                          |   |                          |                          |                          |                          |                          |                          |                          |  |  |  |  |   |  |  |  |  |  |  |  |   |  |  |  |  |  |  |  |   |  |  |  |  |  |  |  |    |  |  |  |  |  |  |  |                                                                                                                                                                                                                                                                                                                                                                                                                                                                                                                                                                                                                                                                                                                                                                                                                                                                                                                                                                                                                                                                                                                                                                                                                                                                                                                                                                                                                                                                                                                                                                                                                                                                                                                                                                                                                                                                                                                                                                                                                                                                                                                                                                                                                                                                                                                                                                                                                                                                                                                                                                                                                                                                                                                                                                                                                                  |  |             |     |              |     |           |        |               |   |                          |                          |                          |                          |                          |                          |                          |   |                          |                          |                          |                          |                          |                          |                          |   |                          |                          |                          |                          |                          |                          |                          |   |                          |                          |                          |                          |                          |                          |                          |   |                          |                          |                          |                          |                          |                          |                          |   |                          |                          |                          |                          |                          |                          |                          |   |                          |                          |                          |                          |                          |                          |                          |   |                          |                          |                          |                          |                          |                          |                          |   |                          |                          |                          |                          |                          |                          |                          |    |                          |                          |                          |                          |                          |                          |                          |
| 5                                                                                                                                                                                                                                                                                                                                                                                                                                                                                                                                                                                                                                                                                                                                                                                                                                                                                                                           | <input type="checkbox"/>                                                                                                                                                                                                                                                                                                                                                                                                                                                                                                                                                                                                                                                                                                                                                                                                                                                                                                                                                                                                                                                                  | <input type="checkbox"/> | <input type="checkbox"/>                                                                              | <input type="checkbox"/> | <input type="checkbox"/> | <input type="checkbox"/> | <input type="checkbox"/> |                 |               |           |   |  |  |  |  |  |  |   |  |   |  |  |  |  |  |   |  |  |                                                                                                                                                                                                                                                                                                                                                                                                                                                                                                                                                                                                                                                                                                                                                        |  |             |     |        |                |                  |               |           |   |                          |                          |                          |                          |                          |                          |                          |   |                          |                          |                          |                          |                          |                          |                          |  |  |  |  |   |  |  |  |  |  |  |  |   |  |  |  |  |  |  |  |   |  |  |  |  |  |  |  |    |  |  |  |  |  |  |  |                                                                                                                                                                                                                                                                                                                                                                                                                                                                                                                                                                                                                                                                                                                                                                                                                                                                                                                                                                                                                                                                                                                                                                                                                                                                                                                                                                                                                                                                                                                                                                                                                                                                                                                                                                                                                                                                                                                                                                                                                                                                                                                                                                                                                                                                                                                                                                                                                                                                                                                                                                                                                                                                                                                                                                                                                                  |  |             |     |              |     |           |        |               |   |                          |                          |                          |                          |                          |                          |                          |   |                          |                          |                          |                          |                          |                          |                          |   |                          |                          |                          |                          |                          |                          |                          |   |                          |                          |                          |                          |                          |                          |                          |   |                          |                          |                          |                          |                          |                          |                          |   |                          |                          |                          |                          |                          |                          |                          |   |                          |                          |                          |                          |                          |                          |                          |   |                          |                          |                          |                          |                          |                          |                          |   |                          |                          |                          |                          |                          |                          |                          |    |                          |                          |                          |                          |                          |                          |                          |
| 6                                                                                                                                                                                                                                                                                                                                                                                                                                                                                                                                                                                                                                                                                                                                                                                                                                                                                                                           | <input type="checkbox"/>                                                                                                                                                                                                                                                                                                                                                                                                                                                                                                                                                                                                                                                                                                                                                                                                                                                                                                                                                                                                                                                                  | <input type="checkbox"/> | <input type="checkbox"/>                                                                              | <input type="checkbox"/> | <input type="checkbox"/> | <input type="checkbox"/> | <input type="checkbox"/> |                 |               |           |   |  |  |  |  |  |  |   |  |   |  |  |  |  |  |   |  |  |                                                                                                                                                                                                                                                                                                                                                                                                                                                                                                                                                                                                                                                                                                                                                        |  |             |     |        |                |                  |               |           |   |                          |                          |                          |                          |                          |                          |                          |   |                          |                          |                          |                          |                          |                          |                          |  |  |  |  |   |  |  |  |  |  |  |  |   |  |  |  |  |  |  |  |   |  |  |  |  |  |  |  |    |  |  |  |  |  |  |  |                                                                                                                                                                                                                                                                                                                                                                                                                                                                                                                                                                                                                                                                                                                                                                                                                                                                                                                                                                                                                                                                                                                                                                                                                                                                                                                                                                                                                                                                                                                                                                                                                                                                                                                                                                                                                                                                                                                                                                                                                                                                                                                                                                                                                                                                                                                                                                                                                                                                                                                                                                                                                                                                                                                                                                                                                                  |  |             |     |              |     |           |        |               |   |                          |                          |                          |                          |                          |                          |                          |   |                          |                          |                          |                          |                          |                          |                          |   |                          |                          |                          |                          |                          |                          |                          |   |                          |                          |                          |                          |                          |                          |                          |   |                          |                          |                          |                          |                          |                          |                          |   |                          |                          |                          |                          |                          |                          |                          |   |                          |                          |                          |                          |                          |                          |                          |   |                          |                          |                          |                          |                          |                          |                          |   |                          |                          |                          |                          |                          |                          |                          |    |                          |                          |                          |                          |                          |                          |                          |
| 7                                                                                                                                                                                                                                                                                                                                                                                                                                                                                                                                                                                                                                                                                                                                                                                                                                                                                                                           | <input type="checkbox"/>                                                                                                                                                                                                                                                                                                                                                                                                                                                                                                                                                                                                                                                                                                                                                                                                                                                                                                                                                                                                                                                                  | <input type="checkbox"/> | <input type="checkbox"/>                                                                              | <input type="checkbox"/> | <input type="checkbox"/> | <input type="checkbox"/> | <input type="checkbox"/> |                 |               |           |   |  |  |  |  |  |  |   |  |   |  |  |  |  |  |   |  |  |                                                                                                                                                                                                                                                                                                                                                                                                                                                                                                                                                                                                                                                                                                                                                        |  |             |     |        |                |                  |               |           |   |                          |                          |                          |                          |                          |                          |                          |   |                          |                          |                          |                          |                          |                          |                          |  |  |  |  |   |  |  |  |  |  |  |  |   |  |  |  |  |  |  |  |   |  |  |  |  |  |  |  |    |  |  |  |  |  |  |  |                                                                                                                                                                                                                                                                                                                                                                                                                                                                                                                                                                                                                                                                                                                                                                                                                                                                                                                                                                                                                                                                                                                                                                                                                                                                                                                                                                                                                                                                                                                                                                                                                                                                                                                                                                                                                                                                                                                                                                                                                                                                                                                                                                                                                                                                                                                                                                                                                                                                                                                                                                                                                                                                                                                                                                                                                                  |  |             |     |              |     |           |        |               |   |                          |                          |                          |                          |                          |                          |                          |   |                          |                          |                          |                          |                          |                          |                          |   |                          |                          |                          |                          |                          |                          |                          |   |                          |                          |                          |                          |                          |                          |                          |   |                          |                          |                          |                          |                          |                          |                          |   |                          |                          |                          |                          |                          |                          |                          |   |                          |                          |                          |                          |                          |                          |                          |   |                          |                          |                          |                          |                          |                          |                          |   |                          |                          |                          |                          |                          |                          |                          |    |                          |                          |                          |                          |                          |                          |                          |
| 8                                                                                                                                                                                                                                                                                                                                                                                                                                                                                                                                                                                                                                                                                                                                                                                                                                                                                                                           | <input type="checkbox"/>                                                                                                                                                                                                                                                                                                                                                                                                                                                                                                                                                                                                                                                                                                                                                                                                                                                                                                                                                                                                                                                                  | <input type="checkbox"/> | <input type="checkbox"/>                                                                              | <input type="checkbox"/> | <input type="checkbox"/> | <input type="checkbox"/> | <input type="checkbox"/> |                 |               |           |   |  |  |  |  |  |  |   |  |   |  |  |  |  |  |   |  |  |                                                                                                                                                                                                                                                                                                                                                                                                                                                                                                                                                                                                                                                                                                                                                        |  |             |     |        |                |                  |               |           |   |                          |                          |                          |                          |                          |                          |                          |   |                          |                          |                          |                          |                          |                          |                          |  |  |  |  |   |  |  |  |  |  |  |  |   |  |  |  |  |  |  |  |   |  |  |  |  |  |  |  |    |  |  |  |  |  |  |  |                                                                                                                                                                                                                                                                                                                                                                                                                                                                                                                                                                                                                                                                                                                                                                                                                                                                                                                                                                                                                                                                                                                                                                                                                                                                                                                                                                                                                                                                                                                                                                                                                                                                                                                                                                                                                                                                                                                                                                                                                                                                                                                                                                                                                                                                                                                                                                                                                                                                                                                                                                                                                                                                                                                                                                                                                                  |  |             |     |              |     |           |        |               |   |                          |                          |                          |                          |                          |                          |                          |   |                          |                          |                          |                          |                          |                          |                          |   |                          |                          |                          |                          |                          |                          |                          |   |                          |                          |                          |                          |                          |                          |                          |   |                          |                          |                          |                          |                          |                          |                          |   |                          |                          |                          |                          |                          |                          |                          |   |                          |                          |                          |                          |                          |                          |                          |   |                          |                          |                          |                          |                          |                          |                          |   |                          |                          |                          |                          |                          |                          |                          |    |                          |                          |                          |                          |                          |                          |                          |
| 9                                                                                                                                                                                                                                                                                                                                                                                                                                                                                                                                                                                                                                                                                                                                                                                                                                                                                                                           | <input type="checkbox"/>                                                                                                                                                                                                                                                                                                                                                                                                                                                                                                                                                                                                                                                                                                                                                                                                                                                                                                                                                                                                                                                                  | <input type="checkbox"/> | <input type="checkbox"/>                                                                              | <input type="checkbox"/> | <input type="checkbox"/> | <input type="checkbox"/> | <input type="checkbox"/> |                 |               |           |   |  |  |  |  |  |  |   |  |   |  |  |  |  |  |   |  |  |                                                                                                                                                                                                                                                                                                                                                                                                                                                                                                                                                                                                                                                                                                                                                        |  |             |     |        |                |                  |               |           |   |                          |                          |                          |                          |                          |                          |                          |   |                          |                          |                          |                          |                          |                          |                          |  |  |  |  |   |  |  |  |  |  |  |  |   |  |  |  |  |  |  |  |   |  |  |  |  |  |  |  |    |  |  |  |  |  |  |  |                                                                                                                                                                                                                                                                                                                                                                                                                                                                                                                                                                                                                                                                                                                                                                                                                                                                                                                                                                                                                                                                                                                                                                                                                                                                                                                                                                                                                                                                                                                                                                                                                                                                                                                                                                                                                                                                                                                                                                                                                                                                                                                                                                                                                                                                                                                                                                                                                                                                                                                                                                                                                                                                                                                                                                                                                                  |  |             |     |              |     |           |        |               |   |                          |                          |                          |                          |                          |                          |                          |   |                          |                          |                          |                          |                          |                          |                          |   |                          |                          |                          |                          |                          |                          |                          |   |                          |                          |                          |                          |                          |                          |                          |   |                          |                          |                          |                          |                          |                          |                          |   |                          |                          |                          |                          |                          |                          |                          |   |                          |                          |                          |                          |                          |                          |                          |   |                          |                          |                          |                          |                          |                          |                          |   |                          |                          |                          |                          |                          |                          |                          |    |                          |                          |                          |                          |                          |                          |                          |
| 10                                                                                                                                                                                                                                                                                                                                                                                                                                                                                                                                                                                                                                                                                                                                                                                                                                                                                                                          | <input type="checkbox"/>                                                                                                                                                                                                                                                                                                                                                                                                                                                                                                                                                                                                                                                                                                                                                                                                                                                                                                                                                                                                                                                                  | <input type="checkbox"/> | <input type="checkbox"/>                                                                              | <input type="checkbox"/> | <input type="checkbox"/> | <input type="checkbox"/> | <input type="checkbox"/> |                 |               |           |   |  |  |  |  |  |  |   |  |   |  |  |  |  |  |   |  |  |                                                                                                                                                                                                                                                                                                                                                                                                                                                                                                                                                                                                                                                                                                                                                        |  |             |     |        |                |                  |               |           |   |                          |                          |                          |                          |                          |                          |                          |   |                          |                          |                          |                          |                          |                          |                          |  |  |  |  |   |  |  |  |  |  |  |  |   |  |  |  |  |  |  |  |   |  |  |  |  |  |  |  |    |  |  |  |  |  |  |  |                                                                                                                                                                                                                                                                                                                                                                                                                                                                                                                                                                                                                                                                                                                                                                                                                                                                                                                                                                                                                                                                                                                                                                                                                                                                                                                                                                                                                                                                                                                                                                                                                                                                                                                                                                                                                                                                                                                                                                                                                                                                                                                                                                                                                                                                                                                                                                                                                                                                                                                                                                                                                                                                                                                                                                                                                                  |  |             |     |              |     |           |        |               |   |                          |                          |                          |                          |                          |                          |                          |   |                          |                          |                          |                          |                          |                          |                          |   |                          |                          |                          |                          |                          |                          |                          |   |                          |                          |                          |                          |                          |                          |                          |   |                          |                          |                          |                          |                          |                          |                          |   |                          |                          |                          |                          |                          |                          |                          |   |                          |                          |                          |                          |                          |                          |                          |   |                          |                          |                          |                          |                          |                          |                          |   |                          |                          |                          |                          |                          |                          |                          |    |                          |                          |                          |                          |                          |                          |                          |
| <p>F10 How many children, including those who have died, do you have?</p>                                                                                                                                                                                                                                                                                                                                                                                                                                                                                                                                                                                                                                                                                                                                                                                                                                                   | <p>_____ ; among them, _____ boy(s)</p>                                                                                                                                                                                                                                                                                                                                                                                                                                                                                                                                                                                                                                                                                                                                                                                                                                                                                                                                                                                                                                                   | <input type="radio"/>    | <input type="checkbox"/> <input type="checkbox"/> , <input type="checkbox"/> <input type="checkbox"/> |                          |                          |                          |                          |                 |               |           |   |  |  |  |  |  |  |   |  |   |  |  |  |  |  |   |  |  |                                                                                                                                                                                                                                                                                                                                                                                                                                                                                                                                                                                                                                                                                                                                                        |  |             |     |        |                |                  |               |           |   |                          |                          |                          |                          |                          |                          |                          |   |                          |                          |                          |                          |                          |                          |                          |  |  |  |  |   |  |  |  |  |  |  |  |   |  |  |  |  |  |  |  |   |  |  |  |  |  |  |  |    |  |  |  |  |  |  |  |                                                                                                                                                                                                                                                                                                                                                                                                                                                                                                                                                                                                                                                                                                                                                                                                                                                                                                                                                                                                                                                                                                                                                                                                                                                                                                                                                                                                                                                                                                                                                                                                                                                                                                                                                                                                                                                                                                                                                                                                                                                                                                                                                                                                                                                                                                                                                                                                                                                                                                                                                                                                                                                                                                                                                                                                                                  |  |             |     |              |     |           |        |               |   |                          |                          |                          |                          |                          |                          |                          |   |                          |                          |                          |                          |                          |                          |                          |   |                          |                          |                          |                          |                          |                          |                          |   |                          |                          |                          |                          |                          |                          |                          |   |                          |                          |                          |                          |                          |                          |                          |   |                          |                          |                          |                          |                          |                          |                          |   |                          |                          |                          |                          |                          |                          |                          |   |                          |                          |                          |                          |                          |                          |                          |   |                          |                          |                          |                          |                          |                          |                          |    |                          |                          |                          |                          |                          |                          |                          |
| <p>F10.1 Your age when gave the first birth</p>                                                                                                                                                                                                                                                                                                                                                                                                                                                                                                                                                                                                                                                                                                                                                                                                                                                                             | <p>_____</p>                                                                                                                                                                                                                                                                                                                                                                                                                                                                                                                                                                                                                                                                                                                                                                                                                                                                                                                                                                                                                                                                              | <input type="radio"/>    | <input type="checkbox"/> <input type="checkbox"/>                                                     |                          |                          |                          |                          |                 |               |           |   |  |  |  |  |  |  |   |  |   |  |  |  |  |  |   |  |  |                                                                                                                                                                                                                                                                                                                                                                                                                                                                                                                                                                                                                                                                                                                                                        |  |             |     |        |                |                  |               |           |   |                          |                          |                          |                          |                          |                          |                          |   |                          |                          |                          |                          |                          |                          |                          |  |  |  |  |   |  |  |  |  |  |  |  |   |  |  |  |  |  |  |  |   |  |  |  |  |  |  |  |    |  |  |  |  |  |  |  |                                                                                                                                                                                                                                                                                                                                                                                                                                                                                                                                                                                                                                                                                                                                                                                                                                                                                                                                                                                                                                                                                                                                                                                                                                                                                                                                                                                                                                                                                                                                                                                                                                                                                                                                                                                                                                                                                                                                                                                                                                                                                                                                                                                                                                                                                                                                                                                                                                                                                                                                                                                                                                                                                                                                                                                                                                  |  |             |     |              |     |           |        |               |   |                          |                          |                          |                          |                          |                          |                          |   |                          |                          |                          |                          |                          |                          |                          |   |                          |                          |                          |                          |                          |                          |                          |   |                          |                          |                          |                          |                          |                          |                          |   |                          |                          |                          |                          |                          |                          |                          |   |                          |                          |                          |                          |                          |                          |                          |   |                          |                          |                          |                          |                          |                          |                          |   |                          |                          |                          |                          |                          |                          |                          |   |                          |                          |                          |                          |                          |                          |                          |    |                          |                          |                          |                          |                          |                          |                          |
| <p>F10.2 Your age when gave the last birth</p>                                                                                                                                                                                                                                                                                                                                                                                                                                                                                                                                                                                                                                                                                                                                                                                                                                                                              | <p>_____</p>                                                                                                                                                                                                                                                                                                                                                                                                                                                                                                                                                                                                                                                                                                                                                                                                                                                                                                                                                                                                                                                                              | <input type="radio"/>    | <input type="checkbox"/> <input type="checkbox"/>                                                     |                          |                          |                          |                          |                 |               |           |   |  |  |  |  |  |  |   |  |   |  |  |  |  |  |   |  |  |                                                                                                                                                                                                                                                                                                                                                                                                                                                                                                                                                                                                                                                                                                                                                        |  |             |     |        |                |                  |               |           |   |                          |                          |                          |                          |                          |                          |                          |   |                          |                          |                          |                          |                          |                          |                          |  |  |  |  |   |  |  |  |  |  |  |  |   |  |  |  |  |  |  |  |   |  |  |  |  |  |  |  |    |  |  |  |  |  |  |  |                                                                                                                                                                                                                                                                                                                                                                                                                                                                                                                                                                                                                                                                                                                                                                                                                                                                                                                                                                                                                                                                                                                                                                                                                                                                                                                                                                                                                                                                                                                                                                                                                                                                                                                                                                                                                                                                                                                                                                                                                                                                                                                                                                                                                                                                                                                                                                                                                                                                                                                                                                                                                                                                                                                                                                                                                                  |  |             |     |              |     |           |        |               |   |                          |                          |                          |                          |                          |                          |                          |   |                          |                          |                          |                          |                          |                          |                          |   |                          |                          |                          |                          |                          |                          |                          |   |                          |                          |                          |                          |                          |                          |                          |   |                          |                          |                          |                          |                          |                          |                          |   |                          |                          |                          |                          |                          |                          |                          |   |                          |                          |                          |                          |                          |                          |                          |   |                          |                          |                          |                          |                          |                          |                          |   |                          |                          |                          |                          |                          |                          |                          |    |                          |                          |                          |                          |                          |                          |                          |
| <p>F10.3 Please tell me about all your children who live with you, live elsewhere or have died, by birth order.</p> <p><b>Biological child:</b> 1 yes 2 no<br/> <b>Sex:</b> 1 male 2 female<br/> <b>Alive or not:</b> 1 alive 2 dead<br/> <b>Age at present:</b><br/> <i>If alive, fill in the age at present. If dead, how</i></p>                                                                                                                                                                                                                                                                                                                                                                                                                                                                                                                                                                                         | <table border="1"> <thead> <tr> <th></th> <th>birth order</th> <th>biological?</th> <th>sex</th> <th>alive?</th> <th>age at present</th> <th>frequent visits</th> <th>communication</th> <th>residence</th> </tr> </thead> <tbody> <tr><td>1</td><td></td><td></td><td></td><td></td><td></td><td></td><td></td><td></td></tr> <tr><td>2</td><td></td><td></td><td></td><td></td><td></td><td></td><td></td><td></td></tr> </tbody> </table>                                                                                                                                                                                                                                                                                                                                                                                                                                                                                                                                                                                                                                              |                          | birth order                                                                                           | biological?              | sex                      | alive?                   | age at present           | frequent visits | communication | residence | 1 |  |  |  |  |  |  |   |  | 2 |  |  |  |  |  |   |  |  | <table border="1"> <thead> <tr> <th></th> <th>biological?</th> <th>sex</th> <th>alive?</th> <th>age at present</th> <th>frequent visits?</th> <th>communication</th> <th>residence</th> </tr> </thead> <tbody> <tr><td>1</td><td><input type="checkbox"/></td><td><input type="checkbox"/></td><td><input type="checkbox"/></td><td><input type="checkbox"/></td><td><input type="checkbox"/></td><td><input type="checkbox"/></td><td><input type="checkbox"/></td></tr> <tr><td>2</td><td><input type="checkbox"/></td><td><input type="checkbox"/></td><td><input type="checkbox"/></td><td><input type="checkbox"/></td><td><input type="checkbox"/></td><td><input type="checkbox"/></td><td><input type="checkbox"/></td></tr> </tbody> </table> |  | biological? | sex | alive? | age at present | frequent visits? | communication | residence | 1 | <input type="checkbox"/> | <input type="checkbox"/> | <input type="checkbox"/> | <input type="checkbox"/> | <input type="checkbox"/> | <input type="checkbox"/> | <input type="checkbox"/> | 2 | <input type="checkbox"/> | <input type="checkbox"/> | <input type="checkbox"/> | <input type="checkbox"/> | <input type="checkbox"/> | <input type="checkbox"/> | <input type="checkbox"/> |  |  |  |  |   |  |  |  |  |  |  |  |   |  |  |  |  |  |  |  |   |  |  |  |  |  |  |  |    |  |  |  |  |  |  |  |                                                                                                                                                                                                                                                                                                                                                                                                                                                                                                                                                                                                                                                                                                                                                                                                                                                                                                                                                                                                                                                                                                                                                                                                                                                                                                                                                                                                                                                                                                                                                                                                                                                                                                                                                                                                                                                                                                                                                                                                                                                                                                                                                                                                                                                                                                                                                                                                                                                                                                                                                                                                                                                                                                                                                                                                                                  |  |             |     |              |     |           |        |               |   |                          |                          |                          |                          |                          |                          |                          |   |                          |                          |                          |                          |                          |                          |                          |   |                          |                          |                          |                          |                          |                          |                          |   |                          |                          |                          |                          |                          |                          |                          |   |                          |                          |                          |                          |                          |                          |                          |   |                          |                          |                          |                          |                          |                          |                          |   |                          |                          |                          |                          |                          |                          |                          |   |                          |                          |                          |                          |                          |                          |                          |   |                          |                          |                          |                          |                          |                          |                          |    |                          |                          |                          |                          |                          |                          |                          |
|                                                                                                                                                                                                                                                                                                                                                                                                                                                                                                                                                                                                                                                                                                                                                                                                                                                                                                                             | birth order                                                                                                                                                                                                                                                                                                                                                                                                                                                                                                                                                                                                                                                                                                                                                                                                                                                                                                                                                                                                                                                                               | biological?              | sex                                                                                                   | alive?                   | age at present           | frequent visits          | communication            | residence       |               |           |   |  |  |  |  |  |  |   |  |   |  |  |  |  |  |   |  |  |                                                                                                                                                                                                                                                                                                                                                                                                                                                                                                                                                                                                                                                                                                                                                        |  |             |     |        |                |                  |               |           |   |                          |                          |                          |                          |                          |                          |                          |   |                          |                          |                          |                          |                          |                          |                          |  |  |  |  |   |  |  |  |  |  |  |  |   |  |  |  |  |  |  |  |   |  |  |  |  |  |  |  |    |  |  |  |  |  |  |  |                                                                                                                                                                                                                                                                                                                                                                                                                                                                                                                                                                                                                                                                                                                                                                                                                                                                                                                                                                                                                                                                                                                                                                                                                                                                                                                                                                                                                                                                                                                                                                                                                                                                                                                                                                                                                                                                                                                                                                                                                                                                                                                                                                                                                                                                                                                                                                                                                                                                                                                                                                                                                                                                                                                                                                                                                                  |  |             |     |              |     |           |        |               |   |                          |                          |                          |                          |                          |                          |                          |   |                          |                          |                          |                          |                          |                          |                          |   |                          |                          |                          |                          |                          |                          |                          |   |                          |                          |                          |                          |                          |                          |                          |   |                          |                          |                          |                          |                          |                          |                          |   |                          |                          |                          |                          |                          |                          |                          |   |                          |                          |                          |                          |                          |                          |                          |   |                          |                          |                          |                          |                          |                          |                          |   |                          |                          |                          |                          |                          |                          |                          |    |                          |                          |                          |                          |                          |                          |                          |
| 1                                                                                                                                                                                                                                                                                                                                                                                                                                                                                                                                                                                                                                                                                                                                                                                                                                                                                                                           |                                                                                                                                                                                                                                                                                                                                                                                                                                                                                                                                                                                                                                                                                                                                                                                                                                                                                                                                                                                                                                                                                           |                          |                                                                                                       |                          |                          |                          |                          |                 |               |           |   |  |  |  |  |  |  |   |  |   |  |  |  |  |  |   |  |  |                                                                                                                                                                                                                                                                                                                                                                                                                                                                                                                                                                                                                                                                                                                                                        |  |             |     |        |                |                  |               |           |   |                          |                          |                          |                          |                          |                          |                          |   |                          |                          |                          |                          |                          |                          |                          |  |  |  |  |   |  |  |  |  |  |  |  |   |  |  |  |  |  |  |  |   |  |  |  |  |  |  |  |    |  |  |  |  |  |  |  |                                                                                                                                                                                                                                                                                                                                                                                                                                                                                                                                                                                                                                                                                                                                                                                                                                                                                                                                                                                                                                                                                                                                                                                                                                                                                                                                                                                                                                                                                                                                                                                                                                                                                                                                                                                                                                                                                                                                                                                                                                                                                                                                                                                                                                                                                                                                                                                                                                                                                                                                                                                                                                                                                                                                                                                                                                  |  |             |     |              |     |           |        |               |   |                          |                          |                          |                          |                          |                          |                          |   |                          |                          |                          |                          |                          |                          |                          |   |                          |                          |                          |                          |                          |                          |                          |   |                          |                          |                          |                          |                          |                          |                          |   |                          |                          |                          |                          |                          |                          |                          |   |                          |                          |                          |                          |                          |                          |                          |   |                          |                          |                          |                          |                          |                          |                          |   |                          |                          |                          |                          |                          |                          |                          |   |                          |                          |                          |                          |                          |                          |                          |    |                          |                          |                          |                          |                          |                          |                          |
| 2                                                                                                                                                                                                                                                                                                                                                                                                                                                                                                                                                                                                                                                                                                                                                                                                                                                                                                                           |                                                                                                                                                                                                                                                                                                                                                                                                                                                                                                                                                                                                                                                                                                                                                                                                                                                                                                                                                                                                                                                                                           |                          |                                                                                                       |                          |                          |                          |                          |                 |               |           |   |  |  |  |  |  |  |   |  |   |  |  |  |  |  |   |  |  |                                                                                                                                                                                                                                                                                                                                                                                                                                                                                                                                                                                                                                                                                                                                                        |  |             |     |        |                |                  |               |           |   |                          |                          |                          |                          |                          |                          |                          |   |                          |                          |                          |                          |                          |                          |                          |  |  |  |  |   |  |  |  |  |  |  |  |   |  |  |  |  |  |  |  |   |  |  |  |  |  |  |  |    |  |  |  |  |  |  |  |                                                                                                                                                                                                                                                                                                                                                                                                                                                                                                                                                                                                                                                                                                                                                                                                                                                                                                                                                                                                                                                                                                                                                                                                                                                                                                                                                                                                                                                                                                                                                                                                                                                                                                                                                                                                                                                                                                                                                                                                                                                                                                                                                                                                                                                                                                                                                                                                                                                                                                                                                                                                                                                                                                                                                                                                                                  |  |             |     |              |     |           |        |               |   |                          |                          |                          |                          |                          |                          |                          |   |                          |                          |                          |                          |                          |                          |                          |   |                          |                          |                          |                          |                          |                          |                          |   |                          |                          |                          |                          |                          |                          |                          |   |                          |                          |                          |                          |                          |                          |                          |   |                          |                          |                          |                          |                          |                          |                          |   |                          |                          |                          |                          |                          |                          |                          |   |                          |                          |                          |                          |                          |                          |                          |   |                          |                          |                          |                          |                          |                          |                          |    |                          |                          |                          |                          |                          |                          |                          |
|                                                                                                                                                                                                                                                                                                                                                                                                                                                                                                                                                                                                                                                                                                                                                                                                                                                                                                                             | biological?                                                                                                                                                                                                                                                                                                                                                                                                                                                                                                                                                                                                                                                                                                                                                                                                                                                                                                                                                                                                                                                                               | sex                      | alive?                                                                                                | age at present           | frequent visits?         | communication            | residence                |                 |               |           |   |  |  |  |  |  |  |   |  |   |  |  |  |  |  |   |  |  |                                                                                                                                                                                                                                                                                                                                                                                                                                                                                                                                                                                                                                                                                                                                                        |  |             |     |        |                |                  |               |           |   |                          |                          |                          |                          |                          |                          |                          |   |                          |                          |                          |                          |                          |                          |                          |  |  |  |  |   |  |  |  |  |  |  |  |   |  |  |  |  |  |  |  |   |  |  |  |  |  |  |  |    |  |  |  |  |  |  |  |                                                                                                                                                                                                                                                                                                                                                                                                                                                                                                                                                                                                                                                                                                                                                                                                                                                                                                                                                                                                                                                                                                                                                                                                                                                                                                                                                                                                                                                                                                                                                                                                                                                                                                                                                                                                                                                                                                                                                                                                                                                                                                                                                                                                                                                                                                                                                                                                                                                                                                                                                                                                                                                                                                                                                                                                                                  |  |             |     |              |     |           |        |               |   |                          |                          |                          |                          |                          |                          |                          |   |                          |                          |                          |                          |                          |                          |                          |   |                          |                          |                          |                          |                          |                          |                          |   |                          |                          |                          |                          |                          |                          |                          |   |                          |                          |                          |                          |                          |                          |                          |   |                          |                          |                          |                          |                          |                          |                          |   |                          |                          |                          |                          |                          |                          |                          |   |                          |                          |                          |                          |                          |                          |                          |   |                          |                          |                          |                          |                          |                          |                          |    |                          |                          |                          |                          |                          |                          |                          |
| 1                                                                                                                                                                                                                                                                                                                                                                                                                                                                                                                                                                                                                                                                                                                                                                                                                                                                                                                           | <input type="checkbox"/>                                                                                                                                                                                                                                                                                                                                                                                                                                                                                                                                                                                                                                                                                                                                                                                                                                                                                                                                                                                                                                                                  | <input type="checkbox"/> | <input type="checkbox"/>                                                                              | <input type="checkbox"/> | <input type="checkbox"/> | <input type="checkbox"/> | <input type="checkbox"/> |                 |               |           |   |  |  |  |  |  |  |   |  |   |  |  |  |  |  |   |  |  |                                                                                                                                                                                                                                                                                                                                                                                                                                                                                                                                                                                                                                                                                                                                                        |  |             |     |        |                |                  |               |           |   |                          |                          |                          |                          |                          |                          |                          |   |                          |                          |                          |                          |                          |                          |                          |  |  |  |  |   |  |  |  |  |  |  |  |   |  |  |  |  |  |  |  |   |  |  |  |  |  |  |  |    |  |  |  |  |  |  |  |                                                                                                                                                                                                                                                                                                                                                                                                                                                                                                                                                                                                                                                                                                                                                                                                                                                                                                                                                                                                                                                                                                                                                                                                                                                                                                                                                                                                                                                                                                                                                                                                                                                                                                                                                                                                                                                                                                                                                                                                                                                                                                                                                                                                                                                                                                                                                                                                                                                                                                                                                                                                                                                                                                                                                                                                                                  |  |             |     |              |     |           |        |               |   |                          |                          |                          |                          |                          |                          |                          |   |                          |                          |                          |                          |                          |                          |                          |   |                          |                          |                          |                          |                          |                          |                          |   |                          |                          |                          |                          |                          |                          |                          |   |                          |                          |                          |                          |                          |                          |                          |   |                          |                          |                          |                          |                          |                          |                          |   |                          |                          |                          |                          |                          |                          |                          |   |                          |                          |                          |                          |                          |                          |                          |   |                          |                          |                          |                          |                          |                          |                          |    |                          |                          |                          |                          |                          |                          |                          |
| 2                                                                                                                                                                                                                                                                                                                                                                                                                                                                                                                                                                                                                                                                                                                                                                                                                                                                                                                           | <input type="checkbox"/>                                                                                                                                                                                                                                                                                                                                                                                                                                                                                                                                                                                                                                                                                                                                                                                                                                                                                                                                                                                                                                                                  | <input type="checkbox"/> | <input type="checkbox"/>                                                                              | <input type="checkbox"/> | <input type="checkbox"/> | <input type="checkbox"/> | <input type="checkbox"/> |                 |               |           |   |  |  |  |  |  |  |   |  |   |  |  |  |  |  |   |  |  |                                                                                                                                                                                                                                                                                                                                                                                                                                                                                                                                                                                                                                                                                                                                                        |  |             |     |        |                |                  |               |           |   |                          |                          |                          |                          |                          |                          |                          |   |                          |                          |                          |                          |                          |                          |                          |  |  |  |  |   |  |  |  |  |  |  |  |   |  |  |  |  |  |  |  |   |  |  |  |  |  |  |  |    |  |  |  |  |  |  |  |                                                                                                                                                                                                                                                                                                                                                                                                                                                                                                                                                                                                                                                                                                                                                                                                                                                                                                                                                                                                                                                                                                                                                                                                                                                                                                                                                                                                                                                                                                                                                                                                                                                                                                                                                                                                                                                                                                                                                                                                                                                                                                                                                                                                                                                                                                                                                                                                                                                                                                                                                                                                                                                                                                                                                                                                                                  |  |             |     |              |     |           |        |               |   |                          |                          |                          |                          |                          |                          |                          |   |                          |                          |                          |                          |                          |                          |                          |   |                          |                          |                          |                          |                          |                          |                          |   |                          |                          |                          |                          |                          |                          |                          |   |                          |                          |                          |                          |                          |                          |                          |   |                          |                          |                          |                          |                          |                          |                          |   |                          |                          |                          |                          |                          |                          |                          |   |                          |                          |                          |                          |                          |                          |                          |   |                          |                          |                          |                          |                          |                          |                          |    |                          |                          |                          |                          |                          |                          |                          |

|                                                                                                                                                                                                                                                                                                                                                                                                                                                                                                                                                                                                                                                                                      |                                                                                                                                                                                          |                                                                                                                                                                                                           |               |  |  |  |  |  |                                                                                                     |                                                                                                                                                       |                                                                                                                                                       |                                                                                                                                                       |                                                                                                     |                                                   |                          |                          |                          |                          |                          |                          |
|--------------------------------------------------------------------------------------------------------------------------------------------------------------------------------------------------------------------------------------------------------------------------------------------------------------------------------------------------------------------------------------------------------------------------------------------------------------------------------------------------------------------------------------------------------------------------------------------------------------------------------------------------------------------------------------|------------------------------------------------------------------------------------------------------------------------------------------------------------------------------------------|-----------------------------------------------------------------------------------------------------------------------------------------------------------------------------------------------------------|---------------|--|--|--|--|--|-----------------------------------------------------------------------------------------------------|-------------------------------------------------------------------------------------------------------------------------------------------------------|-------------------------------------------------------------------------------------------------------------------------------------------------------|-------------------------------------------------------------------------------------------------------------------------------------------------------|-----------------------------------------------------------------------------------------------------|---------------------------------------------------|--------------------------|--------------------------|--------------------------|--------------------------|--------------------------|--------------------------|
| <p><i>old would she/he be today?</i></p> <p><b>Frequent visits?</b> 1 yes 2 no</p> <p><b>Frequent communication?</b> 1 yes 2 no</p> <p><b>Residence:</b></p> <p>0 co-residence with the interviewee</p> <p>1 in the same village/neighborhood</p> <p>2 in the same township/district</p> <p>3 in the same county/city</p> <p>4 in the county/city nearby</p> <p>5 elsewhere</p> <p>8 unknown</p> <p><i>(If alive, fill in the place where she/he lives at present. If dead, fill in the place where she/he lived before her/his death.)</i></p> <p><i>(If the elder can't remember the exact age of children, the interviewer should help her/him recall an approximate one)</i></p> | 3                                                                                                                                                                                        |                                                                                                                                                                                                           |               |  |  |  |  |  |                                                                                                     | <input type="checkbox"/>                                                                                                                              | <input type="checkbox"/>                                                                                                                              | <input type="checkbox"/>                                                                                                                              | <input type="checkbox"/>                                                                            | <input type="checkbox"/>                          | <input type="checkbox"/> | <input type="checkbox"/> | <input type="checkbox"/> | <input type="checkbox"/> | <input type="checkbox"/> |                          |
|                                                                                                                                                                                                                                                                                                                                                                                                                                                                                                                                                                                                                                                                                      | 4                                                                                                                                                                                        |                                                                                                                                                                                                           |               |  |  |  |  |  |                                                                                                     | <input type="checkbox"/>                                                                                                                              | <input type="checkbox"/>                                                                                                                              | <input type="checkbox"/>                                                                                                                              | <input type="checkbox"/>                                                                            | <input type="checkbox"/>                          | <input type="checkbox"/> | <input type="checkbox"/> | <input type="checkbox"/> | <input type="checkbox"/> | <input type="checkbox"/> |                          |
|                                                                                                                                                                                                                                                                                                                                                                                                                                                                                                                                                                                                                                                                                      | 5                                                                                                                                                                                        |                                                                                                                                                                                                           |               |  |  |  |  |  |                                                                                                     | <input type="checkbox"/>                                                                                                                              | <input type="checkbox"/>                                                                                                                              | <input type="checkbox"/>                                                                                                                              | <input type="checkbox"/>                                                                            | <input type="checkbox"/>                          | <input type="checkbox"/> | <input type="checkbox"/> | <input type="checkbox"/> | <input type="checkbox"/> | <input type="checkbox"/> |                          |
|                                                                                                                                                                                                                                                                                                                                                                                                                                                                                                                                                                                                                                                                                      | 6                                                                                                                                                                                        |                                                                                                                                                                                                           |               |  |  |  |  |  |                                                                                                     | <input type="checkbox"/>                                                                                                                              | <input type="checkbox"/>                                                                                                                              | <input type="checkbox"/>                                                                                                                              | <input type="checkbox"/>                                                                            | <input type="checkbox"/>                          | <input type="checkbox"/> | <input type="checkbox"/> | <input type="checkbox"/> | <input type="checkbox"/> | <input type="checkbox"/> |                          |
|                                                                                                                                                                                                                                                                                                                                                                                                                                                                                                                                                                                                                                                                                      | 7                                                                                                                                                                                        |                                                                                                                                                                                                           |               |  |  |  |  |  |                                                                                                     | <input type="checkbox"/>                                                                                                                              | <input type="checkbox"/>                                                                                                                              | <input type="checkbox"/>                                                                                                                              | <input type="checkbox"/>                                                                            | <input type="checkbox"/>                          | <input type="checkbox"/> | <input type="checkbox"/> | <input type="checkbox"/> | <input type="checkbox"/> | <input type="checkbox"/> |                          |
|                                                                                                                                                                                                                                                                                                                                                                                                                                                                                                                                                                                                                                                                                      | 8                                                                                                                                                                                        |                                                                                                                                                                                                           |               |  |  |  |  |  |                                                                                                     | <input type="checkbox"/>                                                                                                                              | <input type="checkbox"/>                                                                                                                              | <input type="checkbox"/>                                                                                                                              | <input type="checkbox"/>                                                                            | <input type="checkbox"/>                          | <input type="checkbox"/> | <input type="checkbox"/> | <input type="checkbox"/> | <input type="checkbox"/> | <input type="checkbox"/> | <input type="checkbox"/> |
|                                                                                                                                                                                                                                                                                                                                                                                                                                                                                                                                                                                                                                                                                      | 9                                                                                                                                                                                        |                                                                                                                                                                                                           |               |  |  |  |  |  |                                                                                                     | <input type="checkbox"/>                                                                                                                              | <input type="checkbox"/>                                                                                                                              | <input type="checkbox"/>                                                                                                                              | <input type="checkbox"/>                                                                            | <input type="checkbox"/>                          | <input type="checkbox"/> | <input type="checkbox"/> | <input type="checkbox"/> | <input type="checkbox"/> | <input type="checkbox"/> | <input type="checkbox"/> |
|                                                                                                                                                                                                                                                                                                                                                                                                                                                                                                                                                                                                                                                                                      | 10                                                                                                                                                                                       |                                                                                                                                                                                                           |               |  |  |  |  |  |                                                                                                     | <input type="checkbox"/>                                                                                                                              | <input type="checkbox"/>                                                                                                                              | <input type="checkbox"/>                                                                                                                              | <input type="checkbox"/>                                                                            | <input type="checkbox"/>                          | <input type="checkbox"/> | <input type="checkbox"/> | <input type="checkbox"/> | <input type="checkbox"/> | <input type="checkbox"/> | <input type="checkbox"/> |
|                                                                                                                                                                                                                                                                                                                                                                                                                                                                                                                                                                                                                                                                                      | 11                                                                                                                                                                                       |                                                                                                                                                                                                           |               |  |  |  |  |  |                                                                                                     | <input type="checkbox"/>                                                                                                                              | <input type="checkbox"/>                                                                                                                              | <input type="checkbox"/>                                                                                                                              | <input type="checkbox"/>                                                                            | <input type="checkbox"/>                          | <input type="checkbox"/> | <input type="checkbox"/> | <input type="checkbox"/> | <input type="checkbox"/> | <input type="checkbox"/> | <input type="checkbox"/> |
|                                                                                                                                                                                                                                                                                                                                                                                                                                                                                                                                                                                                                                                                                      | 12                                                                                                                                                                                       |                                                                                                                                                                                                           |               |  |  |  |  |  |                                                                                                     | <input type="checkbox"/>                                                                                                                              | <input type="checkbox"/>                                                                                                                              | <input type="checkbox"/>                                                                                                                              | <input type="checkbox"/>                                                                            | <input type="checkbox"/>                          | <input type="checkbox"/> | <input type="checkbox"/> | <input type="checkbox"/> | <input type="checkbox"/> | <input type="checkbox"/> | <input type="checkbox"/> |
|                                                                                                                                                                                                                                                                                                                                                                                                                                                                                                                                                                                                                                                                                      | 13                                                                                                                                                                                       |                                                                                                                                                                                                           |               |  |  |  |  |  |                                                                                                     | <input type="checkbox"/>                                                                                                                              | <input type="checkbox"/>                                                                                                                              | <input type="checkbox"/>                                                                                                                              | <input type="checkbox"/>                                                                            | <input type="checkbox"/>                          | <input type="checkbox"/> | <input type="checkbox"/> | <input type="checkbox"/> | <input type="checkbox"/> | <input type="checkbox"/> | <input type="checkbox"/> |
|                                                                                                                                                                                                                                                                                                                                                                                                                                                                                                                                                                                                                                                                                      | F11.1 To whom do you usually talk most frequently in daily life?<br>(Choose three)<br>(to be answered by interviewee only)                                                               | 0 spouse 1 son 2 daughter<br>3 daughter-in-law 4 son-in-law<br>5 grandchildren and their spouses<br>6 other relatives 7 friends/neighbors<br>8 social workers 9 housekeeper<br>10 nobody 11 internet chat |               |  |  |  |  |  |                                                                                                     | First<br><input type="checkbox"/> <input type="checkbox"/>                                                                                            | Second<br><input type="checkbox"/> <input type="checkbox"/>                                                                                           | Third<br><input type="checkbox"/> <input type="checkbox"/>                                                                                            |                                                                                                     |                                                   |                          |                          |                          |                          |                          |                          |
|                                                                                                                                                                                                                                                                                                                                                                                                                                                                                                                                                                                                                                                                                      | F11.2 To whom do you talk first when you need to tell something of your thoughts?<br>(Choose two)<br>(to be answered by interviewee only)                                                | 0 spouse 1 son 2 daughter<br>3 daughter-in-law 4 son-in-law<br>5 grandchildren and their spouses<br>6 other relatives 7 friends/neighbors<br>8 social workers 9 housekeeper<br>10 nobody                  |               |  |  |  |  |  |                                                                                                     | First<br><input type="checkbox"/> <input type="checkbox"/>                                                                                            | Second<br><input type="checkbox"/> <input type="checkbox"/>                                                                                           |                                                                                                                                                       |                                                                                                     |                                                   |                          |                          |                          |                          |                          |                          |
| F11.3 Who do you ask first for help when you have problems/difficulties?<br>(Choose two)<br>(to be answered by interviewee only)                                                                                                                                                                                                                                                                                                                                                                                                                                                                                                                                                     | 0 spouse 1 son 2 daughter<br>3 daughter-in-law 4 son-in-law<br>5 grandchildren and their spouses<br>6 other relatives 7 friends/neighbors<br>8 social workers 9 housekeeper<br>10 nobody |                                                                                                                                                                                                           |               |  |  |  |  |  | First<br><input type="checkbox"/> <input type="checkbox"/>                                          | Second<br><input type="checkbox"/> <input type="checkbox"/>                                                                                           |                                                                                                                                                       |                                                                                                                                                       |                                                                                                     |                                                   |                          |                          |                          |                          |                          |                          |
| F12 How much money (including cash and value of materials) did you get last year from your children and their spouses both living and not living with you? <i>(if more than 100,000, please code 99998)</i>                                                                                                                                                                                                                                                                                                                                                                                                                                                                          | sons                                                                                                                                                                                     | daughters                                                                                                                                                                                                 | grandchildren |  |  |  |  |  | ○                                                                                                   | sons                                                                                                                                                  | daughters                                                                                                                                             | grandchildren                                                                                                                                         |                                                                                                     |                                                   |                          |                          |                          |                          |                          |                          |
|                                                                                                                                                                                                                                                                                                                                                                                                                                                                                                                                                                                                                                                                                      | Yuan                                                                                                                                                                                     | Yuan                                                                                                                                                                                                      | Yuan          |  |  |  |  |  |                                                                                                     | <input type="checkbox"/> <input type="checkbox"/> <input type="checkbox"/> <input type="checkbox"/>                                                   | <input type="checkbox"/> <input type="checkbox"/> <input type="checkbox"/> <input type="checkbox"/> <input type="checkbox"/> <input type="checkbox"/> | <input type="checkbox"/> <input type="checkbox"/> <input type="checkbox"/> <input type="checkbox"/> <input type="checkbox"/> <input type="checkbox"/> | <input type="checkbox"/> <input type="checkbox"/> <input type="checkbox"/> <input type="checkbox"/> | <input type="checkbox"/> <input type="checkbox"/> | <input type="checkbox"/> | <input type="checkbox"/> | <input type="checkbox"/> | <input type="checkbox"/> | <input type="checkbox"/> | <input type="checkbox"/> |
| F13 How much money (including cash and value of materials) did you give last year to your children and their spouses both living and not living with you? <i>(if more than 100,000, please code 99998)</i>                                                                                                                                                                                                                                                                                                                                                                                                                                                                           | sons                                                                                                                                                                                     | daughters                                                                                                                                                                                                 | grandchildren |  |  |  |  |  | ○                                                                                                   | sons                                                                                                                                                  | daughters                                                                                                                                             | grandchildren                                                                                                                                         |                                                                                                     |                                                   |                          |                          |                          |                          |                          |                          |
|                                                                                                                                                                                                                                                                                                                                                                                                                                                                                                                                                                                                                                                                                      | Yuan                                                                                                                                                                                     | Yuan                                                                                                                                                                                                      | Yuan          |  |  |  |  |  | <input type="checkbox"/> <input type="checkbox"/> <input type="checkbox"/> <input type="checkbox"/> | <input type="checkbox"/> <input type="checkbox"/> <input type="checkbox"/> <input type="checkbox"/> <input type="checkbox"/> <input type="checkbox"/> | <input type="checkbox"/> <input type="checkbox"/> <input type="checkbox"/> <input type="checkbox"/> <input type="checkbox"/> <input type="checkbox"/> | <input type="checkbox"/> <input type="checkbox"/> <input type="checkbox"/> <input type="checkbox"/>                                                   | <input type="checkbox"/> <input type="checkbox"/>                                                   | <input type="checkbox"/>                          | <input type="checkbox"/> | <input type="checkbox"/> | <input type="checkbox"/> | <input type="checkbox"/> | <input type="checkbox"/> |                          |

|                                                                                                         |                                                                                                                                                                                                                                                                   |                                                            |                                                                                                                                                                                                                                                                                                              |
|---------------------------------------------------------------------------------------------------------|-------------------------------------------------------------------------------------------------------------------------------------------------------------------------------------------------------------------------------------------------------------------|------------------------------------------------------------|--------------------------------------------------------------------------------------------------------------------------------------------------------------------------------------------------------------------------------------------------------------------------------------------------------------|
| <p>F14. What kind of social services are available in your community?<br/>1 Yes 2 No</p>                | <p>1 personal daily care services<br/>2 home visits<br/>3 psychological consulting<br/>4 daily shopping<br/>5 social and recreation activities<br/>6 legal aid<br/>7 health education<br/>8 neighboring relations<br/>9 others(please specify) _____</p>          | <p style="text-align: center;">○</p>                       | <p style="text-align: right;"> <input type="checkbox"/><br/> <input type="checkbox"/> </p> |
| <p>F15. What kind of social services do you expect to be provided by your community?<br/>1 Yes 2 No</p> | <p>1 personal daily care services<br/>2 home visits<br/>3 psychological consulting<br/>4 daily shopping<br/>5 social and recreation activities<br/>6 legal aid<br/>7 health education<br/>8 neighboring relations<br/>9 others(please specify) _____</p>          | <p style="text-align: center;">○</p>                       | <p style="text-align: right;"> <input type="checkbox"/><br/> <input type="checkbox"/> </p> |
| <p>F16. Which living arrangement do you prefer?<br/>(to be answered by interviewee only)</p>            | <p>1 living alone (or with spouse), no matter how far children live<br/>2 living alone (or with spouse), but it is better that children live nearby<br/>3 coresidence with children<br/>4 institutions (elderly center, elderly home, etc.)<br/>5 do not know</p> | <p style="text-align: right;"><input type="checkbox"/></p> |                                                                                                                                                                                                                                                                                                              |

| <b>G. OBJECTIVE EXAMINATION AND ILLNESSES</b><br><b>ATTENTION: SECTION I</b>                                                                        |                                                                                                                     |                                      | Code                                                                                |
|-----------------------------------------------------------------------------------------------------------------------------------------------------|---------------------------------------------------------------------------------------------------------------------|--------------------------------------|-------------------------------------------------------------------------------------|
| <p>G1 Can the interviewee see a break in the circle on the cardboard sheet when lit by a flashlight and distinguish where the break is located?</p> | <p>1 can see and distinguish<br/>2 can see only<br/>3 cannot see 4 blind</p>                                        |                                      | <p style="text-align: right;"><input type="checkbox"/></p>                          |
| <p>G2.1 How many natural teeth does the interviewee have? (excluding false teeth)</p>                                                               | <p>_____</p>                                                                                                        | <p style="text-align: center;">○</p> | <p style="text-align: right;"><input type="checkbox"/> <input type="checkbox"/></p> |
| <p>G2.2 Does the interviewee have false teeth?</p>                                                                                                  | <p>1 yes 2 no</p>                                                                                                   | <p style="text-align: center;">○</p> | <p style="text-align: right;"><input type="checkbox"/></p>                          |
| <p><b>Oral Hygiene of Personal Care (PhenX code: 080900)</b></p>                                                                                    |                                                                                                                     |                                      |                                                                                     |
| <p>G2.3 How often do you brush your teeth?</p>                                                                                                      | <p>0 Do not<br/>1 Sporadically<br/>2 Once per day<br/>3 Twice per day<br/>4 Trice or more per day<br/>8 Unknown</p> | <p style="text-align: center;">○</p> | <p style="text-align: right;"><input type="checkbox"/></p>                          |
| <p><b>Toothache and Orofacial Pain (PhenX code: 081500)</b></p>                                                                                     |                                                                                                                     |                                      |                                                                                     |
| <p>G2.4 During the past 6 months, did you have a toothache more than once, when biting or chewing?</p>                                              | <p>1 Yes<br/>2 No— <i>If “No”, Skip to G2.5</i></p>                                                                 | <p style="text-align: center;">○</p> | <p style="text-align: right;"><input type="checkbox"/></p>                          |



|                                            |                                                                                                                                  |                                                         |                       |                                                                            |
|--------------------------------------------|----------------------------------------------------------------------------------------------------------------------------------|---------------------------------------------------------|-----------------------|----------------------------------------------------------------------------|
| G2.4.1                                     | On a scale of 1–10, where 1 is mild and 10 is severe, how would you rate this pain at its worst?                                 | _____                                                   | <input type="radio"/> | <input type="checkbox"/>                                                   |
| G2.5                                       | During the past 6 months, did you have pain in the jaw joint or in front of the ear or across your face or cheek more than once? | 1 Yes<br>2 No-- <i>Skip to G3</i>                       | <input type="radio"/> | <input type="checkbox"/>                                                   |
| G2.5.1                                     | On a scale of 1–10, where 1 is mild and 10 is severe, how would you rate this pain at its worst?                                 | _____                                                   | <input type="radio"/> | <input type="checkbox"/>                                                   |
| G3                                         | Can the interviewee use chopsticks to eat?                                                                                       | 1 yes 2 no                                              |                       | <input type="checkbox"/>                                                   |
| <b>Hand Dominance</b> (PhenX code: 020600) |                                                                                                                                  |                                                         |                       |                                                                            |
| G4                                         | Which hand do you normally use to eat?                                                                                           | 1 right-hand 2 left-hand                                | <input type="radio"/> | <input type="checkbox"/>                                                   |
| G4a                                        | Which hand do you normally use to write?                                                                                         | 1 right-hand 2 left-hand<br>3 Never write               | <input type="radio"/> | <input type="checkbox"/>                                                   |
| G4b                                        | Which hand do you normally use to clean your teeth?                                                                              | 1 right-hand 2 left-hand<br>3 Never clean teeth         | <input type="radio"/> | <input type="checkbox"/>                                                   |
| G5.1                                       | Did you ever fall down to ground in the past year?                                                                               | 1 Yes 2 No -- <i>Skip to G6</i>                         | <input type="radio"/> | <input type="checkbox"/>                                                   |
| G5.2                                       | If yes, how many times did you fall down in the past year?                                                                       | _____times ( <i>if don't remember, please code 88</i> ) | <input type="radio"/> | <input type="checkbox"/> <input type="checkbox"/>                          |
| G5.3                                       | Was it serious enough that needed therapy in hospital?                                                                           | 1 Yes 2 No 3 Don't remember                             |                       | <input type="checkbox"/>                                                   |
| G6.                                        | Blood pressure(at least one minute between the two measurement)                                                                  | First measurement<br>_____mm mercury                    |                       | <input type="checkbox"/> <input type="checkbox"/> <input type="checkbox"/> |
| G6.1.1                                     | Systolic                                                                                                                         | _____mm mercury                                         |                       | <input type="checkbox"/> <input type="checkbox"/> <input type="checkbox"/> |
| G6.1.2                                     | Diastolic                                                                                                                        | _____mm mercury                                         |                       | <input type="checkbox"/> <input type="checkbox"/> <input type="checkbox"/> |
| G6.1.1                                     | Systolic                                                                                                                         | _____mm mercury                                         |                       | <input type="checkbox"/> <input type="checkbox"/> <input type="checkbox"/> |
| G6.1.2                                     | Diastolic                                                                                                                        | _____mm mercury                                         |                       | <input type="checkbox"/> <input type="checkbox"/> <input type="checkbox"/> |
| G6                                         | Rhythm of heart                                                                                                                  | 1 regular 2 irregular                                   |                       | <input type="checkbox"/>                                                   |
| G7                                         | Heart rate                                                                                                                       | _____beats/min                                          |                       | <input type="checkbox"/> <input type="checkbox"/> <input type="checkbox"/> |
| G8                                         | Upper extremities - can interviewee put                                                                                          | 1 right 2 left                                          |                       | <input type="checkbox"/>                                                   |
| G8.1                                       | Hand behind neck                                                                                                                 | 3 both 4 neither                                        |                       | <input type="checkbox"/>                                                   |
| G8.2                                       | Hand behind lower back                                                                                                           | 1 right 2 left<br>3 both 4 neither                      |                       | <input type="checkbox"/>                                                   |
| G8.3                                       | Raise arms upright                                                                                                               | 1 right 2 left<br>3 both 4 neither                      |                       | <input type="checkbox"/>                                                   |
| G9                                         | Can the interviewee stand up from sitting in a chair?                                                                            | 1 yes, without using hands<br>2 yes, using hands 3 no   |                       | <input type="checkbox"/>                                                   |
| G10.1                                      | Weight                                                                                                                           | _____ kg 999 unable to weight                           |                       | <input type="checkbox"/> <input type="checkbox"/> <input type="checkbox"/> |

|                                                                                                                                                                                                                                                                                                                                                                                                                                                                                                                                                                                                                 |                              |  |                                                                            |
|-----------------------------------------------------------------------------------------------------------------------------------------------------------------------------------------------------------------------------------------------------------------------------------------------------------------------------------------------------------------------------------------------------------------------------------------------------------------------------------------------------------------------------------------------------------------------------------------------------------------|------------------------------|--|----------------------------------------------------------------------------|
| G10.1.1 Calf circumference                                                                                                                                                                                                                                                                                                                                                                                                                                                                                                                                                                                      | _____ cm                     |  | <input type="checkbox"/> <input type="checkbox"/>                          |
| G10.2 Is the interviewee hunchbacked?<br>(by observation of interviewer)                                                                                                                                                                                                                                                                                                                                                                                                                                                                                                                                        | 1 yes    2 no                |  | <input type="checkbox"/>                                                   |
| <b>Standing height (PhenX code 020703) or self-reported height (PhenX code 020704)</b>                                                                                                                                                                                                                                                                                                                                                                                                                                                                                                                          |                              |  |                                                                            |
| G10.2a Standing Height, measured directly                                                                                                                                                                                                                                                                                                                                                                                                                                                                                                                                                                       | _____ cm; 999 cannot measure |  | <input type="checkbox"/> <input type="checkbox"/> <input type="checkbox"/> |
| G10.2a.1<br>Length from Acromion – processus to styloideus ulnae                                                                                                                                                                                                                                                                                                                                                                                                                                                                                                                                                | _____ cm                     |  | <input type="checkbox"/> <input type="checkbox"/>                          |
| Height from Right knee to the floor                                                                                                                                                                                                                                                                                                                                                                                                                                                                                                                                                                             | _____ cm                     |  | <input type="checkbox"/> <input type="checkbox"/>                          |
| <p>How to indirectly measure height of the elderly(Figure 1 and Figure 2):<br/> Please see the following figure for illustration on positions of Acromion and processus styloideus ulnae.<br/> The method for measuring distance from right knee to the floor is as follows:<br/> Ask elder to take off right shoe;<br/> (1) Ask elder to put the sole of his or her right foot onto the ground and to make his or her right calf and right thigh into a 90 degree angle.<br/> (2) Put a plastic board or a thick paper on his or her right thigh levelly, and measure its height from ground with a ruler.</p> |                              |  |                                                                            |
| 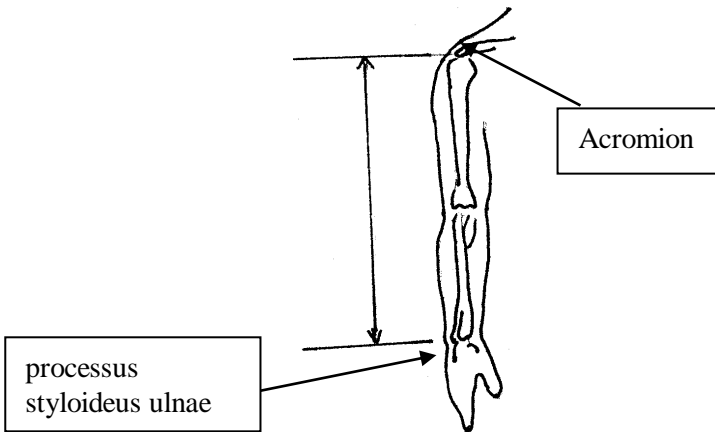                                                                                                                                                                                                                                                                                                                                                                                                                                           |                              |  |                                                                            |
| <b>Waist Circumference (Phenx code: 021600)</b>                                                                                                                                                                                                                                                                                                                                                                                                                                                                                                                                                                 |                              |  |                                                                            |
| G10.2c Waist Circumference                                                                                                                                                                                                                                                                                                                                                                                                                                                                                                                                                                                      | _____ cm                     |  | <input type="checkbox"/> <input type="checkbox"/> <input type="checkbox"/> |
| G10.2d Hip circumference                                                                                                                                                                                                                                                                                                                                                                                                                                                                                                                                                                                        | _____ cm                     |  | <input type="checkbox"/> <input type="checkbox"/> <input type="checkbox"/> |

**Follow the procedures below to obtain this measure**

The waist circumference measurement should be taken on bare skin.

1) Mark the measurement site: Stand on the participant’s right side. Palpate the hip area to locate the right ilium of the pelvis. You may ask the participant to locate his/her ilium before palpation. With the cosmetic pencil, draw a horizontal line just above the uppermost lateral border of the right ilium. Cross this mark at the midaxillary line, which extends from the armpit down the side of the torso. Exhibit 1 shows the anatomical location of the abdominal waist at the ilium. Repeat the same process on the participant's left side.

2) Take the measurement: Make sure the participant does not inhale while his/her waist circumference is being measured and that the tape is not twisted. Wrap the tape measure around the individual’s waist as you would a belt, making sure that the zero end of the measure is at the beginning of the circumference. Use a retractable, tension-controlled steel measuring tape. When measuring the waist, be sure to position the tape in a horizontal plane at the level of the measurement mark. A wall mirror is useful to view the tape to ensure the horizontal alignment of the tape. Another person positioned on the opposite side of the participant should check that the tape sits parallel to the floor and lies snug but does not compress the skin. If a mirror or other person is not available, check the horizontal alignment of the tape before taking the measurement. Always position the zero end of the tape below the section containing the measurement value. Exhibit 1 demonstrates the correct placement of the tape at the ilium. Take the measurement to the nearest 0.1 cm at the end of the participant’s normal expiration.

3) Remove the tape measure and record the result.

4) Repeat the measurement.

Note: Tools are available that include a retractable tape with an anchoring pin that fits into the handle. These tools also assist the participant to lightly cinch the tape. If the investigator uses these tools, the protocol should be altered slightly to comply with directions of the manufacturer. See protocol B for use of this tool when measuring a different waist circumference. Detailed videos illustrating this procedure can be found on the NHANES website at: [http://www.cdc.gov/nchs/products/elec\\_prods/subject/video.htm](http://www.cdc.gov/nchs/products/elec_prods/subject/video.htm)

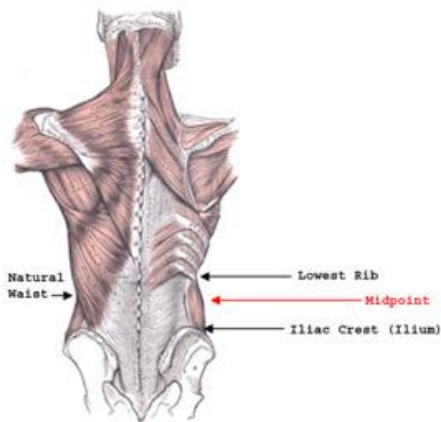

Exhibit 1: Location of Measurement Landmarks between the Lowest Rib and Iliac Crest (Ilium).

**Hearing loss** (PhenX code: 201500)

|                                                           |                           |                       |                          |
|-----------------------------------------------------------|---------------------------|-----------------------|--------------------------|
| G10.6 Do you have any difficulty with your hearing?       | 1 yes<br>2 no—skip to G11 | <input type="radio"/> | <input type="checkbox"/> |
| G10.6.1 In which ear(s) do you have a hearing difficulty? | 1 left 2 right 3 both     | <input type="radio"/> | <input type="checkbox"/> |

|                                                                                                                                                                   |                                                                                                                                                                                                                                                                      |                       |                                                                                                                                                         |
|-------------------------------------------------------------------------------------------------------------------------------------------------------------------|----------------------------------------------------------------------------------------------------------------------------------------------------------------------------------------------------------------------------------------------------------------------|-----------------------|---------------------------------------------------------------------------------------------------------------------------------------------------------|
| G10.6.2 At what age did you first notice a hearing difficulty?                                                                                                    | 1 I have had a hearing difficulty since I was born<br>2 My hearing difficulty developed during my childhood years (before the age of 15)<br>3 My hearing difficulty developed between the ages of 15 and 40<br>4 My hearing difficulty developed after the age of 40 | <input type="radio"/> | <input type="checkbox"/>                                                                                                                                |
| G10.6.3 How quickly did your hearing difficulty develop?                                                                                                          | 1 Suddenly (over a few days)<br>2 Over a few months<br>3 Over several years                                                                                                                                                                                          | <input type="radio"/> |                                                                                                                                                         |
| G11 Was the interviewee able to pick up a book from the floor?                                                                                                    | 1 yes, standing<br>2 yes, sitting                      3 no                                                                                                                                                                                                          |                       | <input type="checkbox"/>                                                                                                                                |
| G12 Was the interviewee able to turn around 360° without help?<br><i>If yes, please count the number of steps required to finish the turn.</i>                    | _____ steps ( <i>if no, fill in '88'</i> )                                                                                                                                                                                                                           |                       | <input type="checkbox"/> <input type="checkbox"/>                                                                                                       |
| G13.0 Have you felt not well in the past two weeks?                                                                                                               | 1 yes    2 no                                                                                                                                                                                                                                                        | <input type="radio"/> | <input type="checkbox"/>                                                                                                                                |
| G13 How many times have you suffered from a serious illness that required hospitalization or caused you to be bedridden at home in the past 2 years?              | _____ ( <i>if no illnesses, fill in '00' and skip to G14; if permanently bedridden, fill in '88'</i> )                                                                                                                                                               | <input type="radio"/> | <input type="checkbox"/> <input type="checkbox"/>                                                                                                       |
| G13.1 Name of disease suffered and bedridden days at the first occurrence (Ref. Code in G15)                                                                      | disease _____ days _____                                                                                                                                                                                                                                             | <input type="radio"/> | <input type="checkbox"/> <input type="checkbox"/> <input type="checkbox"/> , <input type="checkbox"/> <input type="checkbox"/> <input type="checkbox"/> |
| G13.2 Name of disease suffered and bedridden days at the second occurrence (Ref. Code in G15)                                                                     | disease _____ days _____                                                                                                                                                                                                                                             | <input type="radio"/> | <input type="checkbox"/> <input type="checkbox"/> <input type="checkbox"/> , <input type="checkbox"/> <input type="checkbox"/> <input type="checkbox"/> |
| G13.3 Name of disease suffered and bedridden days at the third occurrence. If more than three occurrences, please ask for the last occurrence. (Ref. Code in G15) | disease _____ days _____                                                                                                                                                                                                                                             | <input type="radio"/> | <input type="checkbox"/> <input type="checkbox"/> <input type="checkbox"/> , <input type="checkbox"/> <input type="checkbox"/> <input type="checkbox"/> |

| G14 Are you suffering from any of the following | Yes or no<br>1 yes<br>2 no<br>8 don't know | Diagnosed by hospital?<br>1 yes 2 no | Take medicine?<br>1 yes<br>2 no | Disability in daily life<br>1 rather serious<br>2 more or less<br>3 no | With disease or not?     | Diagnosed by hospital or not? | Take medicine?           | Disability               |
|-------------------------------------------------|--------------------------------------------|--------------------------------------|---------------------------------|------------------------------------------------------------------------|--------------------------|-------------------------------|--------------------------|--------------------------|
| 01 Hypertension                                 |                                            |                                      |                                 |                                                                        | <input type="checkbox"/> | <input type="checkbox"/>      | <input type="checkbox"/> | <input type="checkbox"/> |
| 02 Diabetes                                     |                                            |                                      |                                 |                                                                        | <input type="checkbox"/> | <input type="checkbox"/>      | <input type="checkbox"/> | <input type="checkbox"/> |

|                                             |  |  |  |  |                          |                          |                          |                          |
|---------------------------------------------|--|--|--|--|--------------------------|--------------------------|--------------------------|--------------------------|
| 03 Heart disease                            |  |  |  |  | <input type="checkbox"/> | <input type="checkbox"/> | <input type="checkbox"/> | <input type="checkbox"/> |
| 04 Stroke, cerebrovascular disease          |  |  |  |  | <input type="checkbox"/> | <input type="checkbox"/> | <input type="checkbox"/> | <input type="checkbox"/> |
| 05 Bronchitis, emphysema, asthma, pneumonia |  |  |  |  | <input type="checkbox"/> | <input type="checkbox"/> | <input type="checkbox"/> | <input type="checkbox"/> |
| 06 Pulmonary tuberculosis                   |  |  |  |  | <input type="checkbox"/> | <input type="checkbox"/> | <input type="checkbox"/> | <input type="checkbox"/> |
| 07 Cataracts                                |  |  |  |  | <input type="checkbox"/> | <input type="checkbox"/> | <input type="checkbox"/> | <input type="checkbox"/> |
| 08 Glaucoma                                 |  |  |  |  | <input type="checkbox"/> | <input type="checkbox"/> | <input type="checkbox"/> | <input type="checkbox"/> |
| 09 Cancer _____                             |  |  |  |  | <input type="checkbox"/> | <input type="checkbox"/> | <input type="checkbox"/> | <input type="checkbox"/> |
| 10 Prostate tumor                           |  |  |  |  | <input type="checkbox"/> | <input type="checkbox"/> | <input type="checkbox"/> | <input type="checkbox"/> |
| 11 Gastric or duodenal ulcer                |  |  |  |  | <input type="checkbox"/> | <input type="checkbox"/> | <input type="checkbox"/> | <input type="checkbox"/> |
| 12 Parkinson's disease                      |  |  |  |  | <input type="checkbox"/> | <input type="checkbox"/> | <input type="checkbox"/> | <input type="checkbox"/> |
| 13 Bedsore                                  |  |  |  |  | <input type="checkbox"/> | <input type="checkbox"/> | <input type="checkbox"/> | <input type="checkbox"/> |
| 14 Arthritis                                |  |  |  |  | <input type="checkbox"/> | <input type="checkbox"/> | <input type="checkbox"/> | <input type="checkbox"/> |
| 15 Dementia                                 |  |  |  |  | <input type="checkbox"/> | <input type="checkbox"/> | <input type="checkbox"/> | <input type="checkbox"/> |
| 16 Epilepsy                                 |  |  |  |  | <input type="checkbox"/> | <input type="checkbox"/> | <input type="checkbox"/> | <input type="checkbox"/> |
| 17 Cholecystitis, cholelith disease         |  |  |  |  | <input type="checkbox"/> | <input type="checkbox"/> | <input type="checkbox"/> | <input type="checkbox"/> |
| 18 Blood disease                            |  |  |  |  | <input type="checkbox"/> | <input type="checkbox"/> | <input type="checkbox"/> | <input type="checkbox"/> |
| 19 Rheumatism or rheumatoid disease         |  |  |  |  | <input type="checkbox"/> | <input type="checkbox"/> | <input type="checkbox"/> | <input type="checkbox"/> |
| 20 Chronic nephritis                        |  |  |  |  | <input type="checkbox"/> | <input type="checkbox"/> | <input type="checkbox"/> | <input type="checkbox"/> |
| 21 Galactophore disease                     |  |  |  |  | <input type="checkbox"/> | <input type="checkbox"/> | <input type="checkbox"/> | <input type="checkbox"/> |
| 22 Uterine tumor                            |  |  |  |  | <input type="checkbox"/> | <input type="checkbox"/> | <input type="checkbox"/> | <input type="checkbox"/> |
| 23 Hyperplasia of prostate                  |  |  |  |  | <input type="checkbox"/> | <input type="checkbox"/> | <input type="checkbox"/> | <input type="checkbox"/> |
| 24 Hepatitis                                |  |  |  |  | <input type="checkbox"/> | <input type="checkbox"/> | <input type="checkbox"/> | <input type="checkbox"/> |
| 25 Others, please specify:                  |  |  |  |  | <input type="checkbox"/> | <input type="checkbox"/> | <input type="checkbox"/> | <input type="checkbox"/> |

|                                             |                                                     |                                                   |
|---------------------------------------------|-----------------------------------------------------|---------------------------------------------------|
| <b>G. Physical Health—Section II</b>        |                                                     |                                                   |
| G15.1 Did you smoke in the past 24 hours?   | 1 Yes 2 No 9 not applicable (if not, skip to G16.1) | <input type="checkbox"/>                          |
| G15.2 How many hours since your last smoke? | _____                                               | <input type="checkbox"/> <input type="checkbox"/> |
| G16.1 Did you drink in the past 24 hours?   | 1 Yes 2 No 9 not applicable (if not, skip to G17)   | <input type="checkbox"/>                          |
| G17 Nutritional supplement                  |                                                     |                                                   |

|                                                                  |                           |                                                                                                                                                                                                                                                                                 |                                                          |                          |                          |                   |                          |
|------------------------------------------------------------------|---------------------------|---------------------------------------------------------------------------------------------------------------------------------------------------------------------------------------------------------------------------------------------------------------------------------|----------------------------------------------------------|--------------------------|--------------------------|-------------------|--------------------------|
| G17.1 Do you usually take nutritional supplement?                |                           | 1 Yes 2 No (skip to G17.3 if not)                                                                                                                                                                                                                                               |                                                          | <input type="checkbox"/> |                          |                   |                          |
| G17.2 If usually take nutritional supplement                     |                           |                                                                                                                                                                                                                                                                                 |                                                          |                          |                          |                   |                          |
|                                                                  | Take or not<br>1 yes 2 no | For how<br>many years                                                                                                                                                                                                                                                           | How often<br>1 infrequently<br>2 sometimes 3 often       |                          | Take or not              | How many<br>years | How often                |
| G17.2.1 protein                                                  |                           |                                                                                                                                                                                                                                                                                 |                                                          | <input type="radio"/>    | <input type="checkbox"/> | _____             | <input type="checkbox"/> |
| G17.2.2 calcium                                                  |                           |                                                                                                                                                                                                                                                                                 |                                                          | <input type="radio"/>    | <input type="checkbox"/> | _____             | <input type="checkbox"/> |
| G17.2.3 iron                                                     |                           |                                                                                                                                                                                                                                                                                 |                                                          | <input type="radio"/>    | <input type="checkbox"/> | _____             | <input type="checkbox"/> |
| G17.2.4 zinc                                                     |                           |                                                                                                                                                                                                                                                                                 |                                                          | <input type="radio"/>    | <input type="checkbox"/> | _____             | <input type="checkbox"/> |
| G17.2.5 multivitamin                                             |                           |                                                                                                                                                                                                                                                                                 |                                                          | <input type="radio"/>    | <input type="checkbox"/> | _____             | <input type="checkbox"/> |
| G17.2.6 vitamin A/D                                              |                           |                                                                                                                                                                                                                                                                                 |                                                          | <input type="radio"/>    | <input type="checkbox"/> | _____             | <input type="checkbox"/> |
| G17.2.7 DHA                                                      |                           |                                                                                                                                                                                                                                                                                 |                                                          | <input type="radio"/>    | <input type="checkbox"/> | _____             | <input type="checkbox"/> |
| G17.2.8 others                                                   |                           |                                                                                                                                                                                                                                                                                 |                                                          | <input type="radio"/>    | <input type="checkbox"/> | _____             | <input type="checkbox"/> |
| G17-3 have you taken a nutrient supplement in the past 24 hours? |                           |                                                                                                                                                                                                                                                                                 | 1 Yes 2 No<br>9 not applicable<br>(skip to G18.1 if not) | <input type="radio"/>    | <input type="checkbox"/> |                   |                          |
| G17.4 How many hours since you take supplement last time?        |                           |                                                                                                                                                                                                                                                                                 | _____                                                    | <input type="radio"/>    | _____                    |                   |                          |
| G17.5 Name of the supplement you take in the past 24 hours?      |                           |                                                                                                                                                                                                                                                                                 | _____                                                    | <input type="radio"/>    | _____                    |                   |                          |
| G18 Medicine                                                     |                           |                                                                                                                                                                                                                                                                                 |                                                          |                          |                          |                   |                          |
| G18.1 Did you take any medicine in the past 24 hours?            |                           | 1 Yes 2 No (skip to G19 if not)                                                                                                                                                                                                                                                 |                                                          | <input type="radio"/>    | <input type="checkbox"/> |                   |                          |
| G18.2 Which medicine you take in the past 24 hours?              |                           | 1 hypolipidemic drug<br>2 antihypertensive drug<br>3 oral hypoglycemic drug<br>4 insulin 5 analgesics<br>6 anticoagulants 7 sleeping pills<br>8 drugs for asthma 9 cough medicine<br>10 antibiotics 11 hormonal<br>12 thrombolytic agents<br>13 aspirins 14 diuretics 15 others |                                                          | <input type="radio"/>    | <input type="checkbox"/> |                   |                          |
| G18.3 How many hours since you take medicine last time?          |                           | _____                                                                                                                                                                                                                                                                           |                                                          | <input type="radio"/>    | _____                    |                   |                          |

| H. QUESTIONS FOR INTERVIEWER |                                                 |                                                                                                     | Code                     |
|------------------------------|-------------------------------------------------|-----------------------------------------------------------------------------------------------------|--------------------------|
| H1                           | Was the interviewee able to hear what you said? | 1 yes, without hearing aid<br>2 yes, but needs hearing aid<br>3 partly, despite hearing aid<br>4 no | <input type="checkbox"/> |

|                                                                                                                                                                                                                              |                                                                                                                                                                                                                                                                                                                                                                |                                                                                                                                                                                                                                                                                                                                                                                                                                                                   |
|------------------------------------------------------------------------------------------------------------------------------------------------------------------------------------------------------------------------------|----------------------------------------------------------------------------------------------------------------------------------------------------------------------------------------------------------------------------------------------------------------------------------------------------------------------------------------------------------------|-------------------------------------------------------------------------------------------------------------------------------------------------------------------------------------------------------------------------------------------------------------------------------------------------------------------------------------------------------------------------------------------------------------------------------------------------------------------|
| <p>H2.1 Was the interviewee able to participate in the physical check during the interview?</p>                                                                                                                              | <p>1 yes --- skip to H3<br/>2 no 3 partially able to</p>                                                                                                                                                                                                                                                                                                       | <p><input type="checkbox"/></p>                                                                                                                                                                                                                                                                                                                                                                                                                                   |
| <p>H2.2 If no or partially able, please give reason:</p>                                                                                                                                                                     | <p>1 visually impaired, but can hear<br/>2 hearing impaired, but can see<br/>3 visually and hearing impaired<br/>4 paralyzed<br/>5 did not wish to participate<br/>6 could not understand because of cognitive impairment<br/>7 not able to participate at the moment because of some temporary illness such as a cold<br/>8 other (please explain): _____</p> | <p><input type="checkbox"/></p>                                                                                                                                                                                                                                                                                                                                                                                                                                   |
| <p>H3 The interviewee was</p>                                                                                                                                                                                                | <p>1 surprisingly healthy (almost no obvious ailments)<br/>2 relatively healthy (only minor ailments)<br/>3 moderately ill (moderate degrees of major ailments or illnesses)<br/>4 very ill (major ailments or diseases, bedridden, etc.)</p>                                                                                                                  | <p><input type="checkbox"/></p>                                                                                                                                                                                                                                                                                                                                                                                                                                   |
| <p>H4 Date of birth printed on the individual ID Card</p> <p>(Note: Those oldest old who were not issued individual ID Card according to local regulations, please fill date of birth printed on the household booklet.)</p> | <p>_____year ____month</p>                                                                                                                                                                                                                                                                                                                                     | <p><input type="checkbox"/><input type="checkbox"/><input type="checkbox"/><input type="checkbox"/><input type="checkbox"/><input type="checkbox"/><input type="checkbox"/><input type="checkbox"/></p>                                                                                                                                                                                                                                                           |
| <p>H4.1 Was the date of birth printed on the Individual ID Card (or household booklet) the same as the self-reported age?</p>                                                                                                | <p>1 no 2 yes --- skip to H5<br/>3 no self-reporting --- skip to H5<br/>4 other (specify) _____</p>                                                                                                                                                                                                                                                            | <p><input type="checkbox"/></p>                                                                                                                                                                                                                                                                                                                                                                                                                                   |
| <p>H4.2 If not, which one do you consider correct?</p>                                                                                                                                                                       | <p>1 self-reported age<br/>2 Individual ID Card or household booklet<br/>3 not sure</p>                                                                                                                                                                                                                                                                        | <p><input type="checkbox"/></p>                                                                                                                                                                                                                                                                                                                                                                                                                                   |
| <p>H4.3 ID number printed on the individual ID Card (if ID card is not available for some oldest-old, please fill in "0")</p>                                                                                                | <p>_____</p>                                                                                                                                                                                                                                                                                                                                                   | <p><input type="checkbox"/><input type="checkbox"/><input type="checkbox"/><input type="checkbox"/><input type="checkbox"/><input type="checkbox"/><br/><input type="checkbox"/><input type="checkbox"/><input type="checkbox"/><input type="checkbox"/><input type="checkbox"/><input type="checkbox"/><br/><input type="checkbox"/><input type="checkbox"/><input type="checkbox"/><input type="checkbox"/><input type="checkbox"/><input type="checkbox"/></p> |

|                                                                                                                                                                                                                                                                                                                        |                                                                                                                                                                                                                                                                   |                                                                                   |
|------------------------------------------------------------------------------------------------------------------------------------------------------------------------------------------------------------------------------------------------------------------------------------------------------------------------|-------------------------------------------------------------------------------------------------------------------------------------------------------------------------------------------------------------------------------------------------------------------|-----------------------------------------------------------------------------------|
| <p>H5 Please write the evidence for confirming the interviewee's age-reporting:</p> <p><i>(Regardless of whether or not there is self-reporting, you should confirm the age of the interviewee. If there is not enough space to write down your confirmation, please use the last page of this questionnaire).</i></p> | <p>Age _____</p> <p>Evidence:<br/>_____</p>                                                                                                                                                                                                                       | <p><input type="checkbox"/> <input type="checkbox"/> <input type="checkbox"/></p> |
| <p>H6 Have you checked whether you have failed to ask a question?</p>                                                                                                                                                                                                                                                  | <p>1 yes 2 no</p>                                                                                                                                                                                                                                                 | <p><input type="checkbox"/></p>                                                   |
| <p>H7 Did anyone help the interviewee to answer any question?</p>                                                                                                                                                                                                                                                      | <p>1 yes 2 no (skip H7.1)</p>                                                                                                                                                                                                                                     | <p><input type="checkbox"/></p>                                                   |
| <p>H7.1 If yes, please check whether you have marked 'x' in the <input type="checkbox"/> of the third column for those questions answered by people other than the interviewee. Please indicate mainly who helped to answer those questions.</p>                                                                       | <p>1 spouse<br/>2 child or spouse of child<br/>3 grandchild or spouse of grandchild<br/>4 great grandchild or spouse of great grandchild<br/>5 sibling<br/>6 parent or parent-in-law<br/>7 caregiver or institutional staff<br/>8 other, please specify _____</p> | <p><input type="checkbox"/></p>                                                   |

|                             |  |
|-----------------------------|--|
| <b>SPECIAL OBSERVATIONS</b> |  |
|                             |  |



B Card

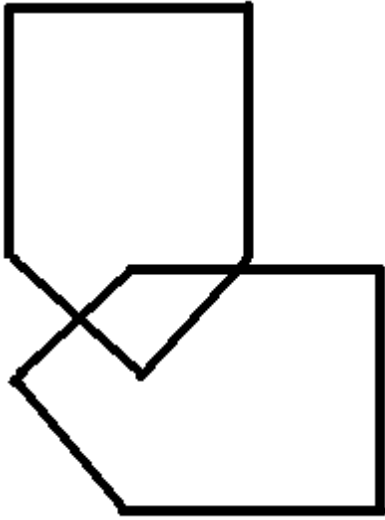

Please draw figure above here:
